# Supplementary material for: S-100 B Concentrations Are a Predictor of Decreased Survival in Patients with Major Trauma, Independently of Head Injury
Source: PubMed Central journal article supplement (PMC4816449; doi:10.1371/journal.pone.0152822), 2016-03-31
Supplement: pone.0152822.s001.pdf [file pone.0152822.s001.pdf]

| Alter Sex | Jahr Austrittsort  | GCS    |
|-----------|--------------------|--------|
| 55 M      | 2008               | 13-15  |
| 29 M      | 2008               | keines |
| 45 M      | 2008               | 13-15  |
| 16 F      | 2008               | 13-15  |
| 32 M      | 2008               | keines |
| 38 F      | 2008               | 13-15  |
| 38 M      | 2008 IMC           | 9-12   |
| 34 F      | 2008               | 13-15  |
| 63 M      | 2008 OP            | 13-15  |
| 20 M      | 2008               | 13-15  |
| 44 F      | 2008               | 13-15  |
| 45 F      | 2008 OP            | keines |
| 17 F      | 2008               | 13-15  |
| 54 M      | 2008               | 13-15  |
| 25 F      | 2008 OP            | 9-12   |
| 41 M      | 2008 Normalstation | 13-15  |
| 76 M      | 2008               | 13-15  |
| 23 F      | 2008 OP            | 13-15  |
| 52 M      | 2008 Normalstation | 9-12   |
| 23 M      | 2008 nach Hause    | 13-15  |
| 74 M      | 2008 OP            | 13-15  |
| 45 M      | 2008 Normalstation | 13-15  |
| 74 M      | 2008               | keines |
| 32 M      | 2008               | 13-15  |
| 81 M      | 2008               | 3-8    |
| 76 F      | 2008               |        |
| 68 M      | 2008               | 3-8    |
| 51 F      | 2008               | keines |
| 19 F      | 2008               | 13-15  |
| 79 F      | 2008 Normalstation | 13-15  |
| 16 M      | 2008               | 13-15  |
| 73 M      | 2008 Normalstatio  | 13-1   |
| 32 M      | 2008               | 13-1   |
| 18 M      | 2008               | 13-1   |
| 30 M      | 2008 Normalstatio  | kein   |
| 76 F      | 2008               | 13-1   |
| 49 M      | 2008               | 13-1   |
| 17 M      | 2008               | 3-     |
| 52 F      | 2008               | 13-1   |
| 54 F      | 2008               | 3-     |
| 16 M      | 2008               | kein   |
| 71 F      | 2008               | 13-1   |
| 21 M      | 2008 nach Hau      | 13-1   |
| 60 F      | 2008               | kein   |
| 45 M      | 2008               | kein   |

|      |                   |      |
|------|-------------------|------|
| 53 M | 2008              | 13-1 |
| 40 M | 2008              | 13-1 |
| 71 M | 2008              | 3-   |
| 49 M | 2008              | 13-1 |
| 44 M | 2008              | 13-1 |
| 30 M | 2008              | 13-1 |
| 28 M | 2008              | 13-1 |
| 23 F | 2008              | 3-   |
| 78 F | 2008              | 13-1 |
| 25 M | 2008              | 13-1 |
| 23 M | 2008              | 13-1 |
| 50 F | 2008              | 3-   |
| 33 M | 2008              | 13-1 |
| 49 F | 2008              | kein |
| 88 F | 2008              | kein |
| 34 F | 2008              | 13-1 |
| 79 M | 2008              | 13-1 |
| 90 M | 2008              | 13-1 |
| 39 M | 2008              | kein |
| 72 M | 2008              | 9-   |
| 66 M | 2008              | 13-1 |
| 65 M | 2008              |      |
| 89 M | 2008 Normalstatio | 13-1 |
| 86 F | 2008              | 13-1 |
| 88 M | 2008 Normalstatio | 13-1 |
| 22 F | 2008              | 13-1 |
| 26 M | 2008              | 13-1 |
| 31 M | 2008              | kein |
| 43 F | 2008              | 13-1 |
| 25 M | 2008              | 3-   |
| 63 M | 2008              | 13-1 |
| 21 F | 2008              | kein |
| 27 M | 2008              | 13-1 |
| 83 M | 2008              | 13-1 |
| 15 M | 2008              | 3-   |
| 60 M | 2008              | kein |
| 24 M | 2008              | 13-1 |
| 82 M | 2008              | 13-1 |
| 62 M | 2008              | 13-1 |
| 25 M | 2008              | 13-1 |
| 28 F | 2008              | 13-1 |
| 29 F | 2008              | 13-1 |
| 61 F | 2008              | kein |
| 54 M | 2008              | 13-1 |
| 19 M | 2008              | 3-   |
| 30 M | 2008              | 13-1 |

|      |                   |      |
|------|-------------------|------|
| 78 F | 2008              | 13-1 |
| 75 F | 2008              | 13-1 |
| 28 M | 2008              | 13-1 |
| 68 M | 2008              | 9-   |
| 51 M | 2008              | 13-1 |
| 20 F | 2008              | 13-1 |
| 76 F | 2008 Normalstatio | 13-1 |
| 83 M | 2008              | 13-1 |
| 50 F | 2008              | 13-1 |
| 71 M | 2008              |      |
| 54 M | 2008              | kein |
| 19 F | 2008              | 13-1 |
| 40 M | 2008              | 3-   |
| 57 F | 2008              | 13-1 |
| 61 M | 2008              | 13-1 |
| 20 M | 2008              | 13-1 |
| 83 M | 2008              | 3-   |
| 24 F | 2008              | 3-   |
| 46 F | 2008              | 13-1 |
| 38 M | 2008 Normalstatio | kein |
| 21 F | 2008              | kein |
| 32 M | 2008              | 13-1 |
| 27 M | 2008              | kein |
| 35 M | 2008              | 13-1 |
| 74 F | 2008              | kein |
| 29 M | 2008              | 13-1 |
| 52 M | 2008              | kein |
| 44 M | 2008              | kein |
| 49 M | 2008              | 13-1 |
| 25 M | 2008              | kein |
| 50 F | 2008              | kein |
| 17 F | 2008              | kein |
| 51 M | 2008              | kein |
| 18 F | 2008              | 13-1 |
| 18 M | 2008              | 13-1 |
| 61 M | 2008              | 13-1 |
| 50 M | 2008              | 3-   |
| 69 M | 2008              | 13-1 |
| 84 M | 2008              | 13-1 |
| 27 M | 2008              | kein |
| 32 F | 2008              |      |
| 22 F | 2008              | 13-1 |
| 49 M | 2008              | 13-1 |
| 40 F | 2008              | 13-1 |
| 83 M | 2008              |      |
| 55 M | 2008              | 3-   |

|      |         |      |
|------|---------|------|
| 32 M | 2008    | 13-1 |
| 53 M | 2008    | 3-   |
| 53 F | 2008    | 13-1 |
| 21 M | 2008    | 13-1 |
| 71 F | 2008    | 13-1 |
| 80 M | 2008    | kein |
| 75 M | 2008    | kein |
| 19 M | 2008    | 3-   |
| 31 M | 2008    | 13-1 |
| 44 M | 2008    | kein |
| 82 F | 2008    | kein |
| 61 M | 2008    | 13-1 |
| 72 M | 2008    | 3-   |
| 17 M | 2008    | 13-1 |
| 46 M | 2008    | 13-1 |
| 55 M | 2008    | 13-1 |
| 37 M | 2008    | 13-1 |
| 68 M | 2008    | kein |
| 63 M | 2008    | kein |
| 26 M | 2008    | kein |
| 52 M | 2008    | kein |
| 20 F | 2008    | 13-1 |
| 38 F | 2008    | 13-1 |
| 19 M | 2008    | kein |
| 22 M | 2008    | 3-   |
| 56 M | 2008    | 13-1 |
| 46 M | 2008    | 3-   |
| 18 M | 2008    | 13-1 |
| 58 M | 2008    | 13-1 |
| 26 M | 2008    | kein |
| 71 M | 2008    | kein |
| 61 M | 2008    | kein |
| 53 M | 2008    | 3-   |
| 19 F | 2008    | 13-1 |
| 45 F | 2008    | 13-1 |
| 37 M | 2008    | 13-1 |
| 26 F | 2008    | 13-1 |
| 44 M | 2008    | kein |
| 17 M | 2008    | kein |
| 48 M | 2008    | 13-1 |
| 47 M | 2008    | kein |
| 35 F | 2008    | 13-1 |
| 17 M | 2008 IM | 13-1 |
| 31 M | 2008    | kein |
| 43 F | 2008 IM | 13-1 |
| 49 F | 2008 IM | 13-1 |

|      |                   |      |
|------|-------------------|------|
| 45 F | 2008              | kein |
| 51 M | 2008              | 13-1 |
| 18 M | 2008              | 13-1 |
| 32 F | 2008              | 13-1 |
| 16 M | 2008              | 13-1 |
| 84 F | 2008              | 13-1 |
| 60 M | 2008              | kein |
| 27 M | 2008              | kein |
| 53 M | 2008              | 13-1 |
| 20 M | 2008              | 13-1 |
| 31 M | 2008              | 13-1 |
| 33 F | 2008              | kein |
| 80 F | 2008              | kein |
| 20 F | 2008              | kein |
| 24 M | 2008              | 13-1 |
| 74 F | 2008              | 13-1 |
| 47 F | 2008              | kein |
| 42 F | 2008              | kein |
| 66 M | 2008 IM           | 9-   |
| 23 M | 2008              | kein |
| 21 M | 2008              | 13-1 |
| 31 M | 2008              | 9-   |
| 25 M | 2008              | 13-1 |
| 35 M | 2008              |      |
| 74 M | 2008              | 13-1 |
| 54 M | 2008              | kein |
| 47 M | 2008              | kein |
| 47 M | 2008              | 13-1 |
| 71 F | 2008              | 13-1 |
| 69 M | 2008              | 13-1 |
| 83 M | 2008              | 13-1 |
| 69 M | 2008 IM           | kein |
| 61 M | 2008              | 9-   |
| 71 F | 2008              | 13-1 |
| 48 F | 2008              | 13-1 |
| 49 M | 2008 Normalstatio | kein |
| 25 M | 2008              | 13-1 |
| 67 M | 2008              | 13-1 |
| 37 M | 2008              | kein |
| 28 M | 2008              | kein |
| 59 M | 2008              | 13-1 |
| 53 M | 2008              | kein |
| 22 M | 2008              | 13-1 |
| 34 M | 2008              | 13-1 |
| 57 M | 2008              | kein |
| 42 M | 2008              | kein |

|      |               |      |
|------|---------------|------|
| 71 M | 2008          | kein |
| 20 M | 2008          | 3-   |
| 42 M | 2008          | kein |
| 28 M | 2008          | 13-1 |
| 16 M | 2008          | kein |
| 43 M | 2008          | 13-1 |
| 43 M | 2008          | 13-1 |
| 82 M | 2008          | 13-1 |
| 38 M | 2008          | 13-1 |
| 25 F | 2008          | 13-1 |
| 61 M | 2008 nach Hau | 13-1 |
| 30 M | 2008          | 13-1 |
| 51 M | 2008          | 13-1 |
| 64 M | 2008          | kein |
| 43 M | 2008          | kein |
| 26 F | 2008          | 3-   |
| 22 M | 2008 nach Hau | 13-1 |
| 38 M | 2008          | kein |
| 26 F | 2008          | 13-1 |
| 59 F | 2008          | 9-   |
| 41 M | 2008          | kein |
| 46 F | 2008          | 9-   |
| 16 M | 2008          | 13-1 |
| 89 F | 2008 nach Hau | kein |
| 46 M | 2008          | kein |
| 70 F | 2008          | 9-   |
| 75 M | 2008          | 13-1 |
| 68 M | 2008          | kein |
| 20 M | 2008          | kein |
| 47 F | 2008          | 13-1 |
| 64 M | 2008          | kein |
| 61 M | 2008          | 13-1 |
| 37 M | 2008          | kein |
| 35 F | 2008          |      |
| 78 M | 2008          |      |
| 39 M | 2008          | kein |
| 35 M | 2008          | kein |
| 17 M | 2008          | 13-1 |
| 54 M | 2008          | kein |
| 61 F | 2008          | kein |
| 68 M | 2008          | 13-1 |
| 58 M | 2008          | 9-   |
| 34 M | 2008          | 13-1 |
| 22 M | 2008          | 13-1 |
| 66 F | 2008          |      |
| 55 M | 2008          | kein |

|      |                   |      |
|------|-------------------|------|
| 48 M | 2008              | 3-   |
| 63 M | 2008              | 3-   |
| 33 M | 2008              | 13-1 |
| 78 M | 2008              | 13-1 |
| 33 M | 2008              | 13-1 |
| 16 F | 2008              | 3-   |
| 58 M | 2008              | 13-1 |
| 27 M | 2008              | 13-1 |
| 59 M | 2008              | 9-   |
| 31 M | 2008              | 13-1 |
| 34 M | 2008              | 13-1 |
| 26 F | 2008              | kein |
| 78 M | 2008              | kein |
| 75 M | 2008              | kein |
| 29 F | 2008              | kein |
| 31 M | 2008              | 13-1 |
| 34 M | 2008 nach Hau     | kein |
| 59 M | 2008              | 13-1 |
| 22 M | 2008              | 13-1 |
| 28 M | 2008              | kein |
| 39 F | 2008              | kein |
| 33 M | 2008              | 9-   |
| 61 M | 2008              | 13-1 |
| 61 M | 2008              | 9-   |
| 28 M | 2008              | 9-   |
| 33 M | 2008              | kein |
| 42 M | 2008 Normalstatio | 13-1 |
| 18 F | 2008              | 9-   |
| 51 F | 2008              | 13-1 |
| 16 F | 2008              | kein |
| 43 M | 2008              | 9-   |
| 36 M | 2008 Normalstatio | kein |
| 17 M | 2008              | 13-1 |
| 51 F | 2008              | 13-1 |
| 65 F | 2008              | 3-   |
| 26 F | 2008              | 13-1 |
| 40 M | 2008              | kein |
| 34 M | 2008              | 13-1 |
| 46 M | 2008              | 13-1 |
| 44 M | 2008              | kein |
| 34 M | 2008              | kein |
| 67 M | 2008 Normalstatio | kein |
| 19 M | 2008              | kein |
| 26 F | 2008              | 13-1 |
| 19 M | 2008              | 13-1 |
| 30 M | 2008              | kein |

|      |                   |      |
|------|-------------------|------|
| 23 F | 2008              | kein |
| 28 M | 2008              | 13-1 |
| 30 M | 2008              | kein |
| 42 M | 2008              | 9-   |
| 56 F | 2008 Normalstatio | kein |
| 43 M | 2008              | kein |
| 53 F | 2008 Normalstatio | 13-1 |
| 24 M | 2008              | 13-1 |
| 49 M | 2008              | 9-   |
| 56 M | 2008              | kein |
| 32 M | 2008 nach Hau     | kein |
| 57 M | 2008              | kein |
| 60 M | 2008              | 3-   |
| 40 M | 2008              | kein |
| 82 F | 2008              | kein |
| 17 M | 2008              | kein |
| 48 F | 2008              | 13-1 |
| 19 F | 2008              | 13-1 |
| 72 M | 2008 Normalstatio | 13-1 |
| 46 M | 2008              | 3-   |
| 49 M | 2008 Normalstatio | 13-1 |
| 44 M | 2008 Normalstatio | kein |
| 35 F | 2008              | 13-1 |
| 31 M | 2008              | 13-1 |
| 43 M | 2008              | 13-1 |
| 22 M | 2008              | kein |
| 22 M | 2008 Normalstatio | kein |
| 49 M | 2008 IM           | 13-1 |
| 76 M | 2008              | kein |
| 87 F | 2008 nach Hau     | kein |
| 77 M | 2008              | kein |
| 24 M | 2008              | 13-1 |
| 67 M | 2008              | kein |
| 25 F | 2008 Normalstatio | kein |
| 27 F | 2008              | 9-   |
| 54 M | 2008 IM           | kein |
| 75 F | 2008              | 13-1 |
| 60 M | 2008              | 13-1 |
| 35 M | 2008              | 13-1 |
| 23 M | 2008              | 3-   |
| 45 F | 2008              | 13-1 |
| 35 M | 2008              | 13-1 |
| 18 M | 2008              | kein |
| 26 F | 2008              | kein |
| 63 M | 2008              | 13-1 |
| 21 M | 2008              | kein |



|      |                   |      |
|------|-------------------|------|
| 23 M | 2008              | 13-1 |
| 66 F | 2008              | 13-1 |
| 46 F | 2008 IM           | 3-   |
| 17 M | 2008              | 13-1 |
| 77 F | 2008              | 13-1 |
| 47 M | 2008              | kein |
| 27 M | 2008              | kein |
| 38 M | 2008              | 3-   |
| 26 F | 2008              | kein |
| 47 M | 2008              | kein |
| 26 F | 2008              | kein |
| 52 M | 2008 nach Hau     | 13-1 |
| 17 M | 2008              | 13-1 |
| 19 M | 2008              | kein |
| 56 F | 2008              | 13-1 |
| 52 M | 2008              | 13-1 |
| 53 M | 2008              | 13-1 |
| 69 F | 2008              | 13-1 |
| 31 F | 2008              | 13-1 |
| 17 M | 2008              | 13-1 |
| 87 M | 2008              | 3-   |
| 63 M | 2008              | 13-1 |
| 53 M | 2008              | kein |
| 46 M | 2008              | 3-   |
| 28 F | 2008              | 3-   |
| 46 M | 2008 nach Hau     | 13-1 |
| 42 F | 2008              | 13-1 |
| 55 M | 2008 nach Hau     | 9-   |
| 74 F | 2008              | 3-   |
| 42 F | 2008              |      |
| 21 M | 2008              | kein |
| 30 M | 2008              | kein |
| 25 F | 2008              | 13-1 |
| 61 M | 2008              | 13-1 |
| 18 F | 2008              | 13-1 |
| 22 M | 2008 IM           | 9-   |
| 31 M | 2008              | 13-1 |
| 20 M | 2008              | 13-1 |
| 30 F | 2008              | 13-1 |
| 46 F | 2008              | kein |
| 91 M | 2008              | 13-1 |
| 29 M | 2008              | 13-1 |
| 22 M | 2008              | kein |
| 29 M | 2008 Normalstatio | 13-1 |
| 19 F | 2008              | kein |
| 20 M | 2008 nach Hau     | 13-1 |

|      |               |      |
|------|---------------|------|
| 21 M | 2008 IM       | 13-1 |
| 32 M | 2008          | 13-1 |
| 36 F | 2008          | kein |
| 44 F | 2008          | 9-   |
| 28 M | 2008 nach Hau | 13-1 |
| 22 M | 2008          | 13-1 |
| 17 F | 2008          | 13-1 |
| 41 M | 2008          | 13-1 |
| 19 M | 2008          | 13-1 |
| 23 M | 2008          | kein |
| 21 M | 2008          | 13-1 |
| 19 F | 2008 IM       | kein |
| 61 M | 2008          | 13-1 |
| 24 F | 2008          | 13-1 |
| 30 M | 2008          | kein |
| 32 F | 2008          | 13-1 |
| 21 M | 2008          | 13-1 |
| 20 F | 2008          | 13-1 |
| 21 M | 2008 nach Hau | 13-1 |
| 22 F | 2008 IM       | 13-1 |
| 25 M | 2008          | 3-   |
| 31 M | 2008          | 13-1 |
| 36 F | 2008          | kein |
| 67 F | 2008          | 13-1 |
| 40 F | 2008          | kein |
| 61 M | 2008          | 13-1 |
| 20 M | 2008          | kein |
| 42 M | 2008          | 13-1 |
| 33 M | 2008 nach Hau | kein |
| 75 M | 2008          | 13-1 |
| 64 M | 2008          | 13-1 |
| 83 F | 2008          | 13-1 |
| 25 M | 2008          | 3-   |
| 54 M | 2008          | 13-1 |
| 73 M | 2008          | 13-1 |
| 66 M | 2008          | 13-1 |
| 41 F | 2008          | 13-1 |
| 34 F | 2008          | 13-1 |
| 75 F | 2008          | 13-1 |
| 34 F | 2008 nach Hau | 13-1 |
| 40 M | 2008          | 3-   |
| 75 M | 2008          | 3-   |
| 72 F | 2008          | 13-1 |
| 40 M | 2008          | 13-1 |
| 36 M | 2008          | 13-1 |
| 56 M | 2008          | kein |

|      |               |      |
|------|---------------|------|
| 43 M | 2008          | 13-1 |
| 85 M | 2008          | 13-1 |
| 56 F | 2008          | 3-   |
| 79 F | 2008          | 13-1 |
| 41 M | 2008          | 13-1 |
| 22 M | 2008          | 13-1 |
| 68 F | 2008          | 13-1 |
| 32 M | 2008          | 13-1 |
| 20 M | 2008          | 13-1 |
| 20 M | 2008          | 3-   |
| 60 M | 2008          | 13-1 |
| 60 M | 2008          | kein |
| 17 M | 2008          | 13-1 |
| 58 M | 2008          | kein |
| 61 F | 2008          | 3-   |
| 97 F | 2008          | 13-1 |
| 63 F | 2008          | 13-1 |
| 57 M | 2008          | 3-   |
| 84 F | 2008          | 13-1 |
| 82 F | 2008          | 3-   |
| 20 M | 2008          | kein |
| 65 M | 2008          | 3-   |
| 34 F | 2008          | 13-1 |
| 72 M | 2008          | 13-1 |
| 30 M | 2008          | 3-   |
| 43 M | 2008          | 3-   |
| 24 F | 2008          | 13-1 |
| 52 M | 2008          | kein |
| 25 M | 2008          | 13-1 |
| 70 F | 2008          | 3-   |
| 46 M | 2008          | kein |
| 42 F | 2008          | 9-   |
| 74 F | 2008 nach Hau | kein |
| 26 M | 2008          | kein |
| 39 F | 2008          | 13-1 |
| 52 M | 2008          | 13-1 |
| 60 M | 2009          | 13-1 |
| 21 F | 2009          | 3-   |
| 75 M | 2009          | 9-   |
| 22 M | 2009          |      |
| 80 F | 2009          | 13-1 |
| 24 M | 2009          | 13-1 |
| 43 M | 2009          | 3-   |
| 41 M | 2009          | 13-1 |
| 52 F | 2009          | 13-1 |
| 57 F | 2009          | 13-1 |

|      |                   |      |
|------|-------------------|------|
| 82 M | 2009              | 13-1 |
| 17 F | 2009              | kein |
| 58 M | 2009              | 13-1 |
| 59 M | 2009 IM           | 13-1 |
| 22 F | 2009 nach Hau     | 13-1 |
| 33 F | 2009 nach Hau     | 13-1 |
| 47 M | 2009              | 3-   |
| 37 M | 2009              | 13-1 |
| 55 M | 2009              | 13-1 |
| 28 M | 2009              | 3-   |
| 62 M | 2009              | 3-   |
| 33 M | 2009              | 3-   |
| 22 F | 2009 nach Hau     | 13-1 |
| 53 M | 2009              | 13-1 |
| 60 F | 2009              | kein |
| 33 F | 2009              | 3-   |
| 21 M | 2009              | 9-   |
| 17 M | 2009              | 13-1 |
| 44 M | 2009              | 3-   |
| 22 F | 2009 nach Hau     | 13-1 |
| 29 M | 2009              | 3-   |
| 54 M | 2009              | 13-1 |
| 52 F | 2009              | kein |
| 73 M | 2009              | 13-1 |
| 28 M | 2009              | 13-1 |
| 55 M | 2009              | 9-   |
| 66 M | 2009              | 13-1 |
| 34 M | 2009              | kein |
| 36 F | 2009              | 13-1 |
| 18 M | 2009 Normalstatio | 13-1 |
| 43 M | 2009              | 3-   |
| 81 M | 2009              | 13-1 |
| 21 M | 2009 Normalstatio | 13-1 |
| 76 M | 2009              | 3-   |
| 53 F | 2009              | 13-1 |
| 52 F | 2009 Normalstatio | 13-1 |
| 39 M | 2009 Normalstatio | kein |
| 16 M | 2009              | kein |
| 79 M | 2009 Normalstatio | 13-1 |
| 23 M | 2009 Normalstatio | 13-1 |
| 57 F | 2009 Normalstatio | 13-1 |
| 22 M | 2009 Normalstatio | 13-1 |
| 27 M | 2009 Normalstatio | 13-1 |
| 55 M | 2009 Normalstatio | kein |
| 66 M | 2009              | kein |
| 49 M | 2009 Normalstatio | 9-   |

|      |                   |      |
|------|-------------------|------|
| 25 M | 2009              | kein |
| 48 M | 2009              | 3-   |
| 39 M | 2009              | 3-   |
| 19 F | 2009 Normalstatio | 13-1 |
| 83 F | 2009 Normalstatio | 13-1 |
| 97 M | 2009 Normalstatio | kein |
| 47 M | 2009 Normalstatio | kein |
| 16 M | 2009 nach Hau     | 9-   |
| 56 M | 2009              | 3-   |
| 74 F | 2009 Normalstatio | kein |
| 28 M | 2009 IM           | kein |
| 59 M | 2009 IM           | 13-1 |
| 24 M | 2009              | kein |
| 57 M | 2009 nach Hau     | kein |
| 36 M | 2009              | kein |
| 50 F | 2009 nach Hau     | 13-1 |
| 58 M | 2009 IM           | kein |
| 39 M | 2009              | kein |
| 48 M | 2009              | 13-1 |
| 37 M | 2009 Normalstatio | 13-1 |
| 17 M | 2009 nach Hau     | 13-1 |
| 47 M | 2009 Normalstatio | kein |
| 47 M | 2009 nach Hau     | 13-1 |
| 44 M | 2009              | 13-1 |
| 16 M | 2009 Normalstatio | kein |
| 68 M | 2009              | 13-1 |
| 35 M | 2009 nach Hau     | 3-   |
| 65 M | 2009              | kein |
| 55 M | 2009              | 13-1 |
| 25 F | 2009 IM           | kein |
| 24 M | 2009 Normalstatio | 13-1 |
| 51 M | 2009 Normalstatio | 13-1 |
| 21 M | 2009 Normalstatio | 13-1 |
| 57 M | 2009 Normalstatio | 13-1 |
| 52 M | 2009              | 13-1 |
| 67 M | 2009              | 13-1 |
| 21 M | 2009 Normalstatio | kein |
| 83 M | 2009              | 3-   |
| 61 F | 2009              | kein |
| 58 M | 2009              | 13-1 |
| 34 M | 2009 Normalstatio | kein |
| 37 M | 2009 Normalstatio | 13-1 |
| 23 M | 2009 nach Hau     | kein |
| 36 M | 2009 Normalstatio | kein |
| 35 M | 2009              | 13-1 |
| 16 M | 2009              | 13-1 |

|      |                   |      |
|------|-------------------|------|
| 47 M | 2009              | 13-1 |
| 55 F | 2009              | 3-   |
| 37 M | 2009              | 3-   |
| 35 M | 2009              | kein |
| 49 M | 2009              | 13-1 |
| 38 M | 2009 IM           | kein |
| 58 M | 2009 Normalstatio | 13-1 |
| 64 M | 2009 Normalstatio | kein |
| 75 F | 2009              | 9-   |
| 20 M | 2009              | 3-   |
| 78 M | 2009              | 13-1 |
| 21 M | 2009              | kein |
| 66 F | 2009              | 13-1 |
| 25 F | 2009 Normalstatio | 13-1 |
| 22 M | 2009              | kein |
| 45 M | 2009              | 13-1 |
| 19 F | 2009              | kein |
| 19 M | 2009 Normalstatio | 13-1 |
| 26 F | 2009              | kein |
| 25 M | 2009              | 13-1 |
| 61 M | 2009              | 13-1 |
| 22 M | 2009 Normalstatio | kein |
| 46 M | 2009 IM           | kein |
| 82 M | 2009              | 13-1 |
| 40 F | 2009 Normalstatio | 13-1 |
| 16 M | 2009 IM           | 13-1 |
| 45 F | 2009 Normalstatio | 13-1 |
| 38 F | 2009 IM           | 13-1 |
| 17 M | 2009 Normalstatio | 13-1 |
| 63 M | 2009              | kein |
| 24 M | 2009 Normalstatio | kein |
| 22 M | 2009              | 9-   |
| 16 F | 2009 Normalstatio | 13-1 |
| 76 M | 2009 IM           | 13-1 |
| 21 M | 2009              | kein |
| 23 M | 2009              | 13-1 |
| 17 M | 2009 Normalstatio | 13-1 |
| 25 M | 2009              | 13-1 |
| 51 M | 2009              | 13-1 |
| 19 M | 2009              | 9-   |
| 27 M | 2009              | kein |
| 30 M | 2009              | 3-   |
| 47 M | 2009              | 13-1 |
| 28 M | 2009 Normalstatio | kein |
| 20 M | 2009 Normalstatio | 13-1 |
| 50 F | 2009              | kein |

|      |                   |      |
|------|-------------------|------|
| 47 F | 2009 Normalstatio | 13-1 |
| 32 M | 2009              | 9-   |
| 25 M | 2009 nach Hau     | 13-1 |
| 54 M | 2009 IM           | 13-1 |
| 31 M | 2009 IM           | kein |
| 23 M | 2009              | 13-1 |
| 38 M | 2009 IM           | 13-1 |
| 52 M | 2009 Normalstatio | kein |
| 49 F | 2009 Normalstatio | kein |
| 58 M | 2009              | kein |
| 55 M | 2009              | 3-   |
| 48 F | 2009 Normalstatio | 13-1 |
| 63 M | 2009              | kein |
| 33 M | 2009 Normalstatio | 13-1 |
| 60 M | 2009              | kein |
| 26 M | 2009              | kein |
| 18 M | 2009              | 3-   |
| 52 M | 2009              | 13-1 |
| 16 F | 2009 Normalstatio | 13-1 |
| 23 M | 2009              | kein |
| 40 M | 2009              | kein |
| 53 M | 2009              | kein |
| 50 M | 2009              | kein |
| 27 M | 2009 Normalstatio | 13-1 |
| 33 M | 2009 nach Hau     | kein |
| 16 M | 2009              | kein |
| 32 M | 2009 nach Hau     | kein |
| 71 M | 2009              | 13-1 |
| 49 M | 2009 IM           | 13-1 |
| 19 M | 2009 IM           | 13-1 |
| 26 M | 2009 Normalstatio | kein |
| 32 F | 2009              | kein |
| 37 F | 2009 nach Hau     | 13-1 |
| 33 M | 2009 Normalstatio | kein |
| 16 M | 2009              | kein |
| 60 M | 2009              | 3-   |
| 62 M | 2009              | 9-   |
| 70 M | 2009              | kein |
| 50 M | 2009              | kein |
| 22 F | 2009              | 13-1 |
| 20 M | 2009 Normalstatio | 3-   |
| 53 F | 2009              | kein |
| 19 F | 2009 Normalstatio | kein |
| 45 F | 2009 Normalstatio | 13-1 |
| 39 M | 2009 IM           | 13-1 |
| 59 F | 2009 Normalstatio | 13-1 |

|      |                   |      |
|------|-------------------|------|
| 46 F | 2009 IM           | kein |
| 21 M | 2009 Normalstatio | 13-1 |
| 31 M | 2009              | 9-   |
| 64 M | 2009 Normalstatio | 13-1 |
| 84 M | 2009              | 13-1 |
| 49 M | 2009              | 13-1 |
| 40 M | 2009 nach Hau     | kein |
| 61 M | 2009 IM           | 13-1 |
| 87 F | 2009              | 13-1 |
| 84 F | 2009 IM           | 13-1 |
| 23 M | 2009              | 3-   |
| 53 M | 2009              | kein |
| 53 F | 2009              | 13-1 |
| 18 M | 2009              | 13-1 |
| 33 M | 2009              | kein |
| 21 M | 2009              | 13-1 |
| 26 M | 2009 Normalstatio | kein |
| 17 M | 2009              | 3-   |
| 51 M | 2009              | 13-1 |
| 65 M | 2009              | 13-1 |
| 24 M | 2009 IM           | 13-1 |
| 23 M | 2009              | kein |
| 56 F | 2009 Normalstatio | 13-1 |
| 47 M | 2009 Normalstatio | 13-1 |
| 76 M | 2009              | 13-1 |
| 37 M | 2009 IM           | kein |
| 70 M | 2009              | kein |
| 38 M | 2009              | kein |
| 33 M | 2009              | kein |
| 29 F | 2009 IM           | 13-1 |
| 18 F | 2009 Normalstatio | kein |
| 49 M | 2009              | kein |
| 22 M | 2009              | 9-   |
| 78 M | 2009 Normalstatio | 13-1 |
| 38 M | 2009 nach Hau     | kein |
| 64 M | 2009              | 13-1 |
| 90 M | 2009              | 13-1 |
| 51 M | 2009 Normalstatio | kein |
| 28 M | 2009 Normalstatio | 13-1 |
| 17 M | 2009 Normalstatio | 13-1 |
| 52 M | 2009              | kein |
| 38 M | 2009              | kein |
| 23 M | 2009 Normalstatio | 13-1 |
| 18 M | 2009              | 3-   |
| 18 F | 2009              | 3-   |
| 52 F | 2009 IM           | 13-1 |



|      |                   |      |
|------|-------------------|------|
| 18 M | 2009              | 9-   |
| 26 M | 2009 Normalstatio | 13-1 |
| 78 M | 2009              | 13-1 |
| 64 M | 2009              | 3-   |
| 47 M | 2009              | kein |
| 19 M | 2009 Normalstatio | 3-   |
| 35 F | 2009 Normalstatio | 13-1 |
| 69 M | 2009              | 13-1 |
| 44 M | 2009              | 13-1 |
| 48 M | 2009 Normalstatio | 13-1 |
| 52 M | 2009 Normalstatio | 13-1 |
| 45 M | 2009              | 13-1 |
| 24 M | 2009 nach Hau     | 13-1 |
| 16 M | 2009              | 3-   |
| 24 F | 2009 Normalstatio | kein |
| 38 F | 2009 nach Hau     | kein |
| 44 M | 2009              | 3-   |
| 49 M | 2009              |      |
| 47 F | 2009              | kein |
| 58 M | 2009 IM           | 13-1 |
| 43 M | 2009              | kein |
| 39 M | 2009              | 13-1 |
| 70 M | 2009              | kein |
| 46 M | 2009              | 3-   |
| 91 F | 2009 IM           | 13-1 |
| 59 F | 2009 IM           | 13-1 |
| 50 M | 2009              | 13-1 |
| 20 F | 2009              | kein |
| 80 M | 2009 Normalstatio | kein |
| 24 F | 2009              | 9-   |
| 21 M | 2009 IM           | kein |
| 18 M | 2009              | 13-1 |
| 55 M | 2009              | kein |
| 45 M | 2009              | kein |
| 66 M | 2009 IM           | kein |
| 25 M | 2009 Normalstatio | kein |
| 18 M | 2009              | kein |
| 60 M | 2009 nach Hau     | kein |
| 54 M | 2009 Normalstatio | kein |
| 41 M | 2009 Normalstatio | kein |
| 22 F | 2009 Normalstatio | kein |
| 34 M | 2009 Normalstatio | 13-1 |
| 39 M | 2009              | kein |
| 24 M | 2009              | 3-   |
| 48 M | 2009              | kein |
| 22 M | 2009              | 3-   |

|      |                   |      |
|------|-------------------|------|
| 25 M | 2009              | kein |
| 30 M | 2009              | kein |
| 91 M | 2009              | kein |
| 78 M | 2009              | kein |
| 71 F | 2009 nach Hau     | 13-1 |
| 38 M | 2009              | kein |
| 61 F | 2009 Normalstatio | kein |
| 66 F | 2009              | 3-   |
| 27 M | 2009              | 3-   |
| 64 F | 2009              | 3-   |
| 71 M | 2009 IM           | 9-   |
| 35 M | 2009 Normalstatio | 13-1 |
| 72 M | 2009              | 13-1 |
| 75 M | 2009              | 13-1 |
| 53 M | 2009 Normalstatio | 13-1 |
| 73 M | 2009              | 9-   |
| 24 M | 2009              | 13-1 |
| 21 M | 2009 IM           | 13-1 |
| 17 M | 2009              | 13-1 |
| 66 M | 2009 Normalstatio | 13-1 |
| 59 M | 2009 Normalstatio | 9-   |
| 36 F | 2009              | 13-1 |
| 46 F | 2009 nach Hau     | 9-   |
| 17 M | 2009              | 9-   |
| 40 M | 2009              | 3-   |
| 63 M | 2009 Normalstatio | kein |
| 47 M | 2009              | 13-1 |
| 57 M | 2009 Normalstatio | kein |
| 45 M | 2009 Normalstatio | 13-1 |
| 83 F | 2009              | 3-   |
| 42 M | 2009              | kein |
| 53 M | 2009              | 3-   |
| 66 M | 2009              | kein |
| 87 M | 2009 IM           | 13-1 |
| 77 M | 2009 Normalstatio | kein |
| 71 M | 2009              | kein |
| 68 M | 2009              | 9-   |
| 34 M | 2009 Normalstatio | 13-1 |
| 73 F | 2009 IM           | 13-1 |
| 51 M | 2009              | kein |
| 17 M | 2009              | 13-1 |
| 18 M | 2009              | 3-   |
| 54 M | 2009              | 3-   |
| 68 F | 2009              | 13-1 |
| 47 M | 2009              | 3-   |
| 31 M | 2009              | 13-1 |

|      |                   |      |
|------|-------------------|------|
| 46 M | 2009              | 3-   |
| 73 M | 2009              | 9-   |
| 64 F | 2009 Normalstatio | kein |
| 55 M | 2009              | kein |
| 85 F | 2009 IM           | 13-1 |
| 57 F | 2009 IM           | kein |
| 66 F | 2009              | 9-   |
| 28 M | 2009              | kein |
| 58 M | 2009              | 9-   |
| 53 M | 2009 IM           | 13-1 |
| 70 M | 2009              | 13-1 |
| 42 M | 2009 Normalstatio | 13-1 |
| 88 F | 2009              | 3-   |
| 35 M | 2009 Normalstatio | 13-1 |
| 31 M | 2009 nach Hau     | kein |
| 29 M | 2009              | kein |
| 45 M | 2009              | 13-1 |
| 77 M | 2009 Normalstatio | 13-1 |
| 53 M | 2009              | kein |
| 16 M | 2009              | 13-1 |
| 42 M | 2009              | 9-   |
| 58 M | 2009 IM           | 13-1 |
| 38 F | 2009 Normalstatio | 13-1 |
| 45 M | 2009 Normalstatio | 13-1 |
| 65 F | 2009              | 13-1 |
| 47 M | 2009 Normalstatio | 13-1 |
| 68 M | 2009              |      |
| 24 F | 2009              | 3-   |
| 65 M | 2009              | 13-1 |
| 37 M | 2009              | 3-   |
| 48 M | 2009              | 13-1 |
| 48 F | 2009 Normalstatio | kein |
| 33 M | 2009              | 3-   |
| 53 M | 2009              | 9-   |
| 17 M | 2009              | 13-1 |
| 65 M | 2009              | 3-   |
| 75 M | 2009              | 3-   |
| 23 M | 2009              | 13-1 |
| 47 M | 2009              | 3-   |
| 67 M | 2009              | 13-1 |
| 83 F | 2009 Normalstatio | 13-1 |
| 26 M | 2009 Normalstatio | 13-1 |
| 33 M | 2009 nach Hau     | 13-1 |
| 18 M | 2009              | 13-1 |
| 43 M | 2009 Normalstatio | kein |
| 23 M | 2009              | 13-1 |

|      |                   |      |
|------|-------------------|------|
| 55 M | 2009              | 13-1 |
| 64 M | 2009              | 3-   |
| 52 M | 2009 IM           | 13-1 |
| 51 F | 2009 Normalstatio | kein |
| 41 M | 2009 nach Hau     | 13-1 |
| 80 F | 2009              | 13-1 |
| 56 M | 2009 Normalstatio | 13-1 |
| 42 M | 2009              | 13-1 |
| 35 M | 2009              | 13-1 |
| 29 M | 2009 Normalstatio | kein |
| 31 M | 2009              | 3-   |
| 47 M | 2009              | kein |
| 88 M | 2009              | kein |
| 57 M | 2009 IM           | 9-   |
| 28 M | 2009              | kein |
| 70 M | 2009              | 9-   |
| 18 M | 2009              | 3-   |
| 40 M | 2009              | 9-   |
| 37 M | 2009 Normalstatio | kein |
| 15 M | 2009 IM           | kein |
| 59 M | 2009              | 9-   |
| 44 F | 2009 Normalstatio | kein |
| 16 F | 2009 Normalstatio | 13-1 |
| 26 M | 2009              | 13-1 |
| 77 M | 2009              | 13-1 |
| 24 M | 2009 Normalstatio | kein |
| 64 M | 2009              | kein |
| 33 M | 2009              | 13-1 |
| 66 M | 2009              | kein |
| 48 F | 2009 Normalstatio | 3-   |
| 25 F | 2009              | 3-   |
| 48 M | 2009              | kein |
| 51 M | 2009              | 9-   |
| 31 F | 2009              | 3-   |
| 47 M | 2009              | kein |
| 80 F | 2009              | 9-   |
| 54 M | 2009              | 9-   |
| 83 M | 2009 IM           | 13-1 |
| 34 F | 2009 Normalstatio | 13-1 |
| 24 M | 2009              | 13-1 |
| 70 F | 2009              | 13-1 |
| 59 M | 2009 Normalstatio | 13-1 |
| 15 M | 2009              | 3-   |
| 44 M | 2009 Normalstatio | 13-1 |
| 82 F | 2009 nach Hau     | kein |
| 61 F | 2009 IM           | 13-1 |

|      |                   |      |
|------|-------------------|------|
| 69 M | 2009              | 13-1 |
| 24 M | 2009              | 3-   |
| 33 M | 2009              | 9-   |
| 17 M | 2009              | 13-1 |
| 19 M | 2009 IM           | kein |
| 58 F | 2009              | kein |
| 19 M | 2009              | kein |
| 45 M | 2009 IM           | 9-   |
| 33 F | 2009 Normalstatio | 13-1 |
| 33 M | 2009              | 3-   |
| 66 M | 2009 Normalstatio | kein |
| 56 M | 2009              | 3-   |
| 20 M | 2009              | 13-1 |
| 28 F | 2009 Normalstatio | 13-1 |
| 37 M | 2009 nach Hau     | 13-1 |
| 19 M | 2009 Normalstatio | 13-1 |
| 48 F | 2009 nach Hau     | 13-1 |
| 56 F | 2009 nach Hau     | kein |
| 37 M | 2009              | kein |
| 28 M | 2009 Normalstatio | 13-1 |
| 73 M | 2009              | kein |
| 59 M | 2009              | 3-   |
| 16 M | 2009 IM           | 13-1 |
| 49 M | 2009              | kein |
| 56 F | 2009              | kein |
| 26 F | 2009 Normalstatio | kein |
| 29 M | 2009              | kein |
| 67 M | 2009              | kein |
| 44 M | 2009              | kein |
| 59 M | 2009              | kein |
| 44 M | 2009              | kein |
| 30 F | 2009              | 13-1 |
| 18 M | 2009 Normalstatio | 13-1 |
| 26 M | 2009              | 13-1 |
| 23 M | 2009              | 13-1 |
| 45 M | 2009 nach Hau     | kein |
| 66 M | 2009              | 13-1 |
| 79 M | 2009 IM           | 13-1 |
| 29 M | 2009 Normalstatio | 13-1 |
| 81 F | 2009 IM           | 13-1 |
| 18 F | 2009 nach Hau     | kein |
| 31 M | 2009              | kein |
| 33 M | 2009              | kein |
| 62 M | 2009 Normalstatio | 13-1 |
| 73 F | 2009 IM           | 13-1 |
| 67 M | 2009              | kein |

|      |                   |      |
|------|-------------------|------|
| 60 M | 2009              | 3-   |
| 61 M | 2009              | 3-   |
| 73 M | 2009              | kein |
| 21 F | 2009 nach Hau     | 13-1 |
| 55 M | 2009              | 13-1 |
| 51 F | 2009 IM           | 13-1 |
| 28 M | 2009 Normalstatio | 13-1 |
| 53 F | 2009 IM           | 13-1 |
| 50 M | 2009              | 13-1 |
| 60 M | 2009 Normalstatio | kein |
| 38 M | 2009              | 13-1 |
| 19 F | 2009 Normalstatio | kein |
| 85 M | 2009              | kein |
| 54 F | 2009              | 13-1 |
| 28 M | 2009 Normalstatio | 13-1 |
| 61 F | 2009              | kein |
| 70 M | 2009 nach Hau     | 13-1 |
| 82 F | 2009              | kein |
| 43 M | 2009              | 13-1 |
| 22 M | 2009              | 13-1 |
| 16 M | 2009              | 13-1 |
| 66 M | 2009              | kein |
| 34 M | 2009 Normalstatio | 13-1 |
| 61 M | 2009              | kein |
| 43 M | 2009 Normalstatio | kein |
| 48 M | 2009              | kein |
| 50 M | 2009 Normalstatio | 13-1 |
| 42 M | 2009              | kein |
| 62 F | 2009 Normalstatio | kein |
| 28 F | 2009 Normalstatio | 13-1 |
| 17 M | 2009              | kein |
| 64 M | 2009 Normalstatio | kein |
| 24 M | 2009              | 3-   |
| 17 F | 2009 Normalstatio | 13-1 |
| 69 M | 2009              | 13-1 |
| 45 M | 2009 Normalstatio | 13-1 |
| 77 M | 2009 IM           | kein |
| 79 F | 2009 IM           | 13-1 |
| 25 M | 2009              | 13-1 |
| 72 M | 2009              | 13-1 |
| 46 M | 2009              | kein |
| 41 F | 2009 Normalstatio | 13-1 |
| 79 F | 2009 Normalstatio | 13-1 |
| 24 M | 2009              | 3-   |
| 85 F | 2009              | kein |
| 66 M | 2009 Normalstatio | 13-1 |

|      |                   |      |
|------|-------------------|------|
| 60 M | 2009              | 13-1 |
| 18 F | 2009 nach Hau     | kein |
| 45 M | 2009 Normalstatio | 13-1 |
| 19 M | 2009 Normalstatio | 9-   |
| 62 F | 2009 Normalstatio | kein |
| 81 F | 2009              | 3-   |
| 67 M | 2009              | 13-1 |
| 89 M | 2009 Normalstatio | 9-   |
| 23 F | 2009 nach Hau     | 13-1 |
| 61 M | 2009 Normalstatio | kein |
| 17 F | 2009 Normalstatio | 13-1 |
| 37 M | 2009              | kein |
| 59 M | 2009              | kein |
| 78 M | 2009 IM           | 9-   |
| 38 M | 2009              | 3-   |
| 39 M | 2009 Normalstatio | 13-1 |
| 83 M | 2009 Normalstatio | kein |
| 83 F | 2009              | kein |
| 84 F | 2009 Normalstatio | 13-1 |
| 52 F | 2009              | 9-   |
| 56 F | 2009 Normalstatio | kein |
| 53 M | 2009              | 3-   |
| 29 M | 2009 IM           | 13-1 |
| 25 M | 2009              | kein |
| 31 F | 2009 Normalstatio | kein |
| 40 M | 2009 Normalstatio | 13-1 |
| 92 M | 2009 Normalstatio | 13-1 |
| 19 M | 2009 Normalstatio | 9-   |
| 82 M | 2009              | 3-   |
| 27 M | 2009              | 13-1 |
| 69 M | 2009              | 3-   |
| 19 M | 2009              | kein |
| 16 M | 2009 Normalstatio | kein |
| 34 M | 2009 nach Hau     | 13-1 |
| 32 M | 2009 nach Hau     | 13-1 |
| 40 M | 2009              | 13-1 |
| 64 F | 2009 Normalstatio | 13-1 |
| 19 M | 2009              | 3-   |
| 48 M | 2009 nach Hau     | kein |
| 96 M | 2009 Normalstatio | 13-1 |
| 30 M | 2009              | kein |
| 32 M | 2009 Normalstatio | kein |
| 44 F | 2009 IM           | 3-   |
| 48 F | 2009 Normalstatio | 13-1 |
| 21 F | 2009 nach Hau     | kein |
| 17 M | 2009 nach Hau     | 13-1 |

|      |                   |      |
|------|-------------------|------|
| 88 F | 2009 IM           | 13-1 |
| 16 M | 2009 Normalstatio | kein |
| 30 M | 2009              | 3-   |
| 19 M | 2009 Normalstatio | 13-1 |
| 18 M | 2009              | 3-   |
| 28 M | 2009 Normalstatio | 13-1 |
| 49 M | 2009              | 13-1 |
| 36 M | 2009 Normalstatio | kein |
| 32 F | 2009              | 9-   |
| 19 F | 2009              | 3-   |
| 21 M | 2009              | 13-1 |
| 41 F | 2009 Normalstatio | 13-1 |
| 62 M | 2009              | 3-   |
| 53 F | 2009              | kein |
| 11 M | 2009 Normalstatio | 3-   |
| 17 M | 2009              | 3-   |
| 34 F | 2009              | 9-   |
| 26 M | 2009              | kein |
| 76 M | 2010 Normalstatio | 13-1 |
| 39 M | 2010 IM           | kein |
| 41 F | 2010              | kein |
| 48 M | 2010 IM           | 9-   |
| 43 F | 2010              | 13-1 |
| 71 M | 2010 Normalstatio | kein |
| 27 M | 2010 Normalstatio | kein |
| 29 F | 2010 Normalstatio | kein |
| 10 F | 2010 Normalstatio | kein |
| 31 F | 2010 nach Hau     | 3-   |
| 71 M | 2010              | 3-   |
| 60 M | 2010 Normalstatio | kein |
| 41 M | 2010 Normalstatio | 13-1 |
| 59 F | 2010 Normalstatio | kein |
| 26 M | 2010              | 13-1 |
| 33 M | 2010              | 9-   |
| 38 M | 2010 nach Hau     | 13-1 |
| 16 M | 2010              | 9-   |
| 86 F | 2010 nach Hau     | 13-1 |
| 51 M | 2010              | 13-1 |
| 68 M | 2010              | 13-1 |
| 22 M | 2010 Normalstatio | 13-1 |
| 66 M | 2010              | 13-1 |
| 62 F | 2010 Normalstatio | kein |
| 21 F | 2010              | 3-   |
| 41 M | 2010              | kein |
| 16 M | 2010              | 13-1 |
| 28 M | 2010 Normalstatio | 13-1 |



|      |                   |      |
|------|-------------------|------|
| 27 M | 2010              | 9-   |
| 33 M | 2010              | kein |
| 30 M | 2010              | kein |
| 16 M | 2010              | 3-   |
| 64 M | 2010              | 9-   |
| 24 M | 2010 nach Hau     | 13-1 |
| 43 F | 2010 Normalstatio | 13-1 |
| 67 M | 2010 IM           | 13-1 |
| 23 M | 2010 nach Hau     | kein |
| 53 F | 2010              | 13-1 |
| 27 F | 2010              | 13-1 |
| 41 M | 2010 IM           | 13-1 |
| 19 M | 2010 Normalstatio | 13-1 |
| 85 F | 2010 Normalstatio | 9-   |
| 39 M | 2010 Normalstatio | kein |
| 38 M | 2010              | 3-   |
| 42 M | 2010              | kein |
| 28 M | 2010 Normalstatio | 13-1 |
| 32 M | 2010 IM           | kein |
| 16 M | 2010 Normalstatio | 13-1 |
| 17 M | 2010              | 13-1 |
| 87 M | 2010              | 13-1 |
| 51 M | 2010              | 13-1 |
| 66 M | 2010 Normalstatio | 13-1 |
| 20 F | 2010 nach Hau     | 13-1 |
| 32 M | 2010 Normalstatio | 13-1 |
| 16 F | 2010 IM           | 13-1 |
| 33 F | 2010              | 3-   |
| 30 M | 2010 Normalstatio | kein |
| 72 M | 2010              | 3-   |
| 32 F | 2010 Normalstatio | 3-   |
| 36 M | 2010              | 3-   |
| 16 M | 2010              | 3-   |
| 61 M | 2010              | 13-1 |
| 36 M | 2010 IM           | kein |
| 31 M | 2010              | kein |
| 34 M | 2010              | 13-1 |
| 25 M | 2010 Normalstatio | 13-1 |
| 34 M | 2010 Normalstatio | 13-1 |
| 18 M | 2010              | kein |
| 37 F | 2010 IM           | 13-1 |
| 63 F | 2010              | kein |
| 37 F | 2010 Normalstatio | 13-1 |
| 28 F | 2010              | 13-1 |
| 54 M | 2010 Normalstatio | kein |
| 50 M | 2010              | 13-1 |

|      |                   |      |
|------|-------------------|------|
| 39 M | 2010              | 13-1 |
| 67 F | 2010 Normalstatio | 13-1 |
| 72 M | 2010              | 13-1 |
| 25 M | 2010 Normalstatio | 13-1 |
| 60 M | 2010              | 3-   |
| 36 M | 2010              | 9-   |
| 52 F | 2010              | 9-   |
| 61 F | 2010 Normalstatio | 13-1 |
| 85 M | 2010 nach Hau     | kein |
| 81 F | 2010 IM           | kein |
| 18 M | 2010 IM           | 13-1 |
| 69 M | 2010 nach Hau     | 13-1 |
| 50 M | 2010 Normalstatio | 13-1 |
| 47 M | 2010              | 13-1 |
| 44 M | 2010 nach Hau     | kein |
| 16 F | 2010 nach Hau     | kein |
| 42 M | 2010 nach Hau     | 13-1 |
| 66 M | 2010              | 3-   |
| 35 M | 2010 IM           | 13-1 |
| 57 M | 2010 Normalstatio | 13-1 |
| 73 F | 2010              | 13-1 |
| 39 M | 2010              | kein |
| 44 F | 2010 Normalstatio | kein |
| 21 M | 2010 nach Hau     | 13-1 |
| 83 M | 2010 IM           | 3-   |
| 42 M | 2010              | kein |
| 27 M | 2010              | kein |
| 56 M | 2010              | kein |
| 36 F | 2010              | 3-   |
| 40 M | 2010              | kein |
| 17 M | 2010              | 13-1 |
| 23 M | 2010 Normalstatio | kein |
| 22 M | 2010              | 13-1 |
| 18 M | 2010              | kein |
| 53 M | 2010 Normalstatio | 13-1 |
| 52 F | 2010              | 13-1 |
| 38 M | 2010              | 9-   |
| 51 M | 2010              | 13-1 |
| 21 M | 2010              | kein |
| 48 M | 2010              | 13-1 |
| 45 M | 2010 nach Hau     | kein |
| 55 F | 2010              | 3-   |
| 37 F | 2010 Normalstatio | 13-1 |
| 35 F | 2010 nach Hau     | 13-1 |
| 57 M | 2010              | 13-1 |
| 51 M | 2010              | kein |

|      |                   |      |
|------|-------------------|------|
| 25 M | 2010 Normalstatio | 13-1 |
| 67 M | 2010              | 13-1 |
| 58 F | 2010 nach Hau     | kein |
| 27 F | 2010              | kein |
| 57 M | 2010              | 13-1 |
| 53 M | 2010 Normalstatio | kein |
| 66 M | 2010 nach Hau     | 3-   |
| 61 F | 2010              | 3-   |
| 45 M | 2010              | 3-   |
| 31 M | 2010 nach Hau     | 13-1 |
| 66 F | 2010              | 3-   |
| 59 M | 2010 Normalstatio | 13-1 |
| 65 M | 2010              | 13-1 |
| 65 M | 2010              | 13-1 |
| 51 M | 2010 Normalstatio | 13-1 |
| 35 M | 2010 Normalstatio | 13-1 |
| 83 F | 2010              | kein |
| 32 M | 2010 Normalstatio | 13-1 |
| 60 M | 2010              | 13-1 |
| 46 F | 2010              | kein |
| 48 M | 2010              | kein |
| 37 F | 2010              | 13-1 |
| 74 M | 2010 Normalstatio | kein |
| 19 M | 2010              | 3-   |
| 44 M | 2010 Normalstatio | kein |
| 65 M | 2010              | kein |
| 70 F | 2010              | kein |
| 45 M | 2010              | kein |
| 56 F | 2010 Normalstatio | 13-1 |
| 63 F | 2010 IM           | 13-1 |
| 63 M | 2010 Normalstatio | 13-1 |
| 68 M | 2010              | 3-   |
| 43 F | 2010 nach Hau     | kein |
| 43 M | 2010              | kein |
| 22 M | 2010              | kein |
| 50 M | 2010 Normalstatio | 13-1 |
| 46 M | 2010              | 3-   |
| 42 M | 2010              | kein |
| 82 F | 2010 Normalstatio | 13-1 |
| 57 M | 2010 Normalstatio | 13-1 |
| 56 M | 2010              | 3-   |
| 26 M | 2010 Normalstatio | kein |
| 49 M | 2010              | 9-   |
| 53 M | 2010              | 3-   |
| 50 M | 2010              | kein |
| 38 M | 2010 IM           | 3-   |

|      |                   |      |
|------|-------------------|------|
| 52 M | 2010 Normalstatio | kein |
| 41 F | 2010 Normalstatio | 9-   |
| 69 M | 2010              | 3-   |
| 40 M | 2010              | 13-1 |
| 42 M | 2010              | 9-   |
| 43 M | 2010 Normalstatio | 3-   |
| 45 M | 2010              | 9-   |
| 23 M | 2010              | 13-1 |
| 33 F | 2010 Normalstatio | 13-1 |
| 26 M | 2010              | kein |
| 75 F | 2010              |      |
| 59 M | 2010              | kein |
| 22 F | 2010 Normalstatio | kein |
| 43 F | 2010 nach Hau     | 13-1 |
| 26 F | 2010 IM           | 13-1 |
| 38 M | 2010              | 9-   |
| 22 F | 2010              | 3-   |
| 55 M | 2010 Normalstatio | 13-1 |
| 28 F | 2010 IM           | 13-1 |
| 20 F | 2010 Normalstatio | 13-1 |
| 41 M | 2010 Normalstatio | 13-1 |
| 21 F | 2010              | 13-1 |
| 29 M | 2010              | kein |
| 42 M | 2010 Normalstatio | kein |
| 30 F | 2010 Normalstatio | 13-1 |
| 21 M | 2010              | kein |
| 55 M | 2010 nach Hau     | kein |
| 59 M | 2010 IM           | kein |
| 54 F | 2010 Normalstatio | 13-1 |
| 32 M | 2010              | kein |
| 40 M | 2010              | kein |
| 45 M | 2010              | kein |
| 41 M | 2010              | kein |
| 37 M | 2010 nach Hau     | kein |
| 32 M | 2010 Normalstatio | 13-1 |
| 33 M | 2010              | 13-1 |
| 23 M | 2010              | kein |
| 50 M | 2010              | kein |
| 33 M | 2010              | 13-1 |
| 70 F | 2010 IM           | 13-1 |
| 24 M | 2010              | 3-   |
| 55 M | 2010              | 9-   |
| 73 M | 2010 Normalstatio | 13-1 |
| 61 M | 2010 IM           | 13-1 |
| 29 M | 2010              | 13-1 |
| 57 M | 2010              | 13-1 |

|      |                   |      |
|------|-------------------|------|
| 81 F | 2010              | kein |
| 38 F | 2010 nach Hau     | kein |
| 24 F | 2010 nach Hau     | kein |
| 55 F | 2010              | 13-1 |
| 62 M | 2010              | kein |
| 36 M | 2010 nach Hau     | kein |
| 68 M | 2010              | 3-   |
| 75 M | 2010              | 9-   |
| 44 M | 2010 IM           | 13-1 |
| 78 M | 2010              | 3-   |
| 46 M | 2010 Normalstatio | kein |
| 22 M | 2010              | 13-1 |
| 45 F | 2010              | 13-1 |
| 42 F | 2010 Normalstatio | 13-1 |
| 83 M | 2010              | 9-   |
| 47 M | 2010 Normalstatio | 13-1 |
| 92 F | 2010              | 3-   |
| 61 M | 2010              | 3-   |
| 44 M | 2010              | 13-1 |
| 64 M | 2010 Normalstatio | 13-1 |
| 64 M | 2010              | 13-1 |
| 86 M | 2010              | 13-1 |
| 46 F | 2010 Normalstatio | 13-1 |
| 34 M | 2010              | kein |
| 56 M | 2010 IM           | 13-1 |
| 54 M | 2010 Normalstatio | 13-1 |
| 50 M | 2010 Normalstatio | 13-1 |
| 51 M | 2010 Normalstatio | kein |
| 18 M | 2010              | 13-1 |
| 44 M | 2010 Normalstatio | kein |
| 61 M | 2010              | 13-1 |
| 22 M | 2010              | kein |
| 41 M | 2010              | kein |
| 29 M | 2010              | 9-   |
| 30 F | 2010 IM           | 13-1 |
| 62 F | 2010 nach Hau     | kein |
| 46 F | 2010              | 13-1 |
| 21 M | 2010              | 13-1 |
| 26 M | 2010              | kein |
| 43 M | 2010 Normalstatio | kein |
| 25 F | 2010              | 3-   |
| 22 M | 2010 Normalstatio | 13-1 |
| 16 M | 2010              | 13-1 |
| 46 F | 2010 Normalstatio | kein |
| 72 M | 2010              | 13-1 |
| 32 F | 2010              | 13-1 |

|      |                   |      |
|------|-------------------|------|
| 37 M | 2010              | 13-1 |
| 37 M | 2010              | kein |
| 46 M | 2010              | 3-   |
| 79 M | 2010              | 13-1 |
| 28 F | 2010 nach Hau     | kein |
| 32 F | 2010              | 13-1 |
| 55 F | 2010              | kein |
| 31 F | 2010              | kein |
| 40 M | 2010              | 13-1 |
| 46 M | 2010 Normalstatio | kein |
| 48 M | 2010              | 13-1 |
| 22 M | 2010              | 3-   |
| 70 F | 2010              | 9-   |
| 21 F | 2010 Normalstatio | 13-1 |
| 66 M | 2010              | 13-1 |
| 52 M | 2010              | kein |
| 73 M | 2010              | kein |
| 26 M | 2010 Normalstatio | 13-1 |
| 29 M | 2010 nach Hau     | 13-1 |
| 27 M | 2010 IM           | kein |
| 36 M | 2010              | 13-1 |
| 29 M | 2010              | 9-   |
| 19 M | 2010              | 9-   |
| 44 F | 2010              | kein |
| 79 M | 2010 Normalstatio | 13-1 |
| 32 M | 2010              | 3-   |
| 63 M | 2010              | 13-1 |
| 31 M | 2010 nach Hau     | kein |
| 59 M | 2010              | 9-   |
| 77 M | 2010              | 3-   |
| 43 M | 2011              | 13-1 |
| 67 M | 2011              | 3-   |
| 64 F | 2011              | 13-1 |
| 85 M | 2011              | 3-   |

Befund\_Schädel\_Rx

bland

bland

bland

bland

Subduralhämatom

Subduralhämatom

bland

bland

bland

bland

bland

bland

bland

Kombination SDH+EDH

bland

bland

bland

bland

bland

Intrazerebrale Blutung

bland

bland

bland

Kombination SDH+EDH

bland

bland

Fort I und II

bland

blan

blan

blan

blan

blan

blan

Subduralhämato

Schödelbasisfraktu

blan

blan

Subarachnoidalblutun

blan

blan

blan

Epiduralhämatom + Felsenbeinfraktu

Subarachnoidalblutung + multiple Fraktur

blan

Kombination EDH+SA

blan

blan

Fraktur Os nasal

blan

blan

blan

blan

blan

blan

blan

Subarachnoidalblutun

blan

Nasenbeinfrakt

Subarachnoidalblutun

Subarachnoidalblutun

Intrazerebrale Blutu

Subarachnoidalblutung, intrazerebrale Blutung, Felsenbeinfrakt

blan

blan

blan

blan

SAB + EDH + SD

blan

Mandibulafrakt

blan

Subduralhämatom + Fraktu

blan

blan

Subarachnoidalblutun

blan

blan

blan

blan

Subarachnoidalblutun

Subduralhämatom + Frakture

blan



blan

blan

blan

Subduralhämatom

blan

blan

blan

Subduralhämatom

blan

blan

blan

blan

Subduralhämatom

blan

Subduralhämatom

Kalottenfraktu

blan

Subduralhämatom + Kontusionsblutung

blan

blan

blan

blan

Blow-Out-Frakt

blan

blan

blan

blan

blan

blan

Epiduralhämatom + Frakture

blan

blan

blan

blan

Kombination SDH+ I

Subarachnoidalblutun

Epiduralhämato

blan

blan

blan

blan

blan

blan

blan

blan

blan

Intrazerebrale Blutu

blan

Kombination SDH+SA

blan

blan

blan

blan

Orbitawandfraktu

SDH + EDH + SAB + Fraktu

blan

blan

SDH + Fraktu

blan

blan

blan

blan

blan

blan

blan

blan

Epiduralhämato

blan

Fraktu

Fraktu

blan

Suturensprengu

blan

blan

blan

blan

Schädelbasisfraktu

blan

blan

blan

blan

blan

blan

Kombination EDH+IC

blan

Subduralhämato

blan

blan

blan

Subduralhämato

blan

blan

blan

blan

Epiduralhämatom + Schädelkalottenfrakt

blan

blan

blan

blan

blan

blan

Nasenbeinfrakt

blan

blan

Subarachnoidalblutun

blan

blan

Gesichtsfraktu

blan

blan

Subarachnoidalblutun

blan

blan

Subduralhämato

blan

blan

Kombination SDH+ I

Gesichtsfrakture

blan

blan

blan

Subarachnoidalblutun

Gesichtsfrakture

blan

blan

blan

blan

Fraktur Occipita

blan

blan

blan

blan

Kombination SDH+SA

blan

blan

blan

blan

blan

blan

blan

Kombination SDH+SA

Subduralhämatom

blan

blan

Kombination SDH+SA

Fraktu

blan

blan

blan

blan

blan

extracranielle Blutu

Epiduralhämatom

Epiduralhämatom

blan

blan

blan

Kombination EDH+SA

Subarachnoidalblutun

Kombination SDH+SA

blan

Epiduralhämatom

blan

blan

blan

blan

Epiduralhämatom

blan

Kontusionsblutung + Kalottenfraktu

blan

blan

blan

Fraktu

blan

blan

blan

blan

Subduralhämatom

blan

blan

blan

blan

blan

blan

blan

blan

Nasenbeinfrakt

blan

Fraktu

blan

Kombination SDH+SAB+ I

blan

blan

blan

Kalottenfraktu

blan

Nasenbeinfrakt

Kombination SDH+EDH + ICB + SA

blan

Kalottenfraktu

blan

Kombination EDH+SA

blan

Kombination SDH+SA

Epiduralhämato

Fraktu

blan

blan

Kombination SAB+ICB + Frak

Fraktu

Kombination SDH+SA

blan

blan

Alveolarkammfraktu

Gesichtsfrakt

blan

Kombination SAB+IC

blan

blan

blan

blan

blan

blan

blan

blan

blan

Kombination SDH+SA

Kombination SDH+SA

blan

blan

blan

Fraktu

Kombination SDH+SA

blan

Fraktu

Intrazerebrale Blutu

blan

blan

blan

Kombination SDH+SA

blan

blan

blan

Epiduralhämato

Unterkieferfrakt

blan

blan

blan

Intrazerebrale Blutu

blan

Mandibularfraktu

blan

Epiduralhämatom  
blan  
blan  
multiple Fraktur

Fraktur  
blan  
Intrazerebrale Blutung  
blan  
blan

Kombination SDH+SA  
blan  
blan  
Fraktur  
blan  
Fraktur  
blan  
Intrazerebrale Blutung  
Subarachnoidalblutung  
blan  
blan  
blan

Kombination SDH+SA  
blan  
Nasenbeinfraktur  
blan  
Subarachnoidalblutung  
Epiduralhämatom  
blan  
Intrazerebrale Blutung  
Fraktur  
Subarachnoidalblutung  
Kombination SDH+SA

Fraktur  
blan  
blan  
Epiduralhämatom  
Kombination SDH+SA  
blan  
blan  
blan  
blan



Fraktu

Kombination SDH+SA

Kontusionsblutun

blan

blan

Kontusionsblutun

blan

blan

blan

blan

Le Fort I und

blan

blan

blan

Intrazerebrale Blutu

blan

Subduralhämato

Kombination SDH+SA

Subduralhämato

Kontusionsblutun

blan

Kombination SDH+SAB+IC

blan

blan

Kombination SDH+SA

blan

blan

blan

Kombination SDH+SA

Kombination SDH+SA

blan

Kombination SDH+ I

blan

Fraktu

blan

blan

blan

blan

Kombination SAB+IC

blan

Fraktu

Epiduralhämato

blan

Sinus maxillaris Frakt

multiple Fraktur

Kombination SAB+IC

Subduralhämatom

blan

blan

Kombination SDH+SAB + IC

blan

Subduralhämatom

Kombination SDH+ I

Subduralhämatom

Kombination SDH+SA

blan

Epiduralhämatom

blan

Subduralhämatom

blan

Subduralhämatom

blan

Subduralhämatom

Kombination EDH+SA

blan

blan

blan

blan

blan

Subarachnoidalblutung

blan

blan

blan

blan

Kombination SAB+IC

blan

Kombination SDH+ I

Kombination SDH+ I

blan

Subduralhämatom

blan

blan

blan

Fraktu

blan

Intrazerebrale Blutu

blan

blan

blan

blan

blan

blan

Subarachnoidalblutun

blan

Subduralhämatom

blan

Kombination SDH+SA

blan

blan

blan

blan

Intrazerebrale Blutu

blan

Epiduralhämato

Kombination SDH+SA

Subarachnoidalblutun

blan

Intrazerebrale Blutu

blan

blan

blan

Kombination SDH+SA

blan

Intrazerebrale Blutu

blan

blan

blan

blan

blan

blan

blan

blan

Subduralhämato

blan

Subduralhämato

blan

Kombination SDH+EDH + IC

blan

blan

blan

blan

blan

Intrazerebrale Blutu

blan

Kombination EDH+IC

Kombination SDH+SA

blan

Kombination SDH+EDH+ICB+SA

blan

blan

Subarachnoidalblutun

blan

Subduralhämato

blan

Kombination EDH+SA

blan

blan

blan

blan

blan

blan

blan

Intrazerebrale Blutu

Epiduralhämato

blan

blan

blan

blan

Intrazerebrale Blutu

blan

blan

blan

blan

blan

blan

Kombination SDH+ED

blan

blan

Subduralhämato

blan

blan

blan

blan

blan

blan

blan

Kombination SDH+SA

Intrazerebrale Blutu

blan

Kombination SDH+SAB+IC

blan

blan

Kombination SDH+ I

blan

Kombination EDH+SA

blan

blan

blan

blan

blan

blan

blan

Kombination SAB+IC

blan

blan

blan

blan

blan

blan

blan

Kombination SDH+SA

Kombination SDH+SA

blan

Kombination EDH+SAB+IC

blan

Subduralhämato

blan

blan

blan

blan

blan

blan

blan

blan

blan

Kombination SDH+SA

Kombination SAB+IC

blan

blan

Kombination SAB+IC

blan

blan

blan

Subarachnoidalblutun

blan

blan

Subduralhämato

blan

blan

blan

Epiduralhämato

blan

blan

blan

blan

Kombination SAB+IC

blan

Intrazerebrale Blutu

blan

Kombination SDH+SAB+IC

blan

blan

Kombination SDH+EDH+SA

blan

Kombination SDH+SAB+IC

blan

blan

blan

Kombination SDH+ I

Kombination SAB+IC

Kombination SDH+SA

blan



Epiduralhämato

blan

blan

blan

Subduralhämato

blan

blan

Intrazerebrale Blutu

blan

blan

blan

Kombination SDH+EDH+SAB+IC

blan

blan

blan

blan

blan

blan

blan

Subarachnoidalblutun

blan

Kombination SDH+ED

Kombination SDH+ED

blan

Subarachnoidalblutun

blan

blan

Kombination SAB+IC

blan

Subduralhämato

blan

blan

Subduralhämato

Kombination SAB+IC

blan

blan

blan

blan

blan

blan

blan

blan

blan

Intrazerebrale Blutu  
Kombination EDH+SAB+IC  
Intrazerebrale Blutu  
blan  
blan  
blan  
blan  
blan  
Hirnöð  
blan  
Intrazerebrale Blutu  
blan  
blan  
Subarachnoidalblutun  
blan  
Subduralhämato  
Kombination EDH+IC  
Subduralhämato  
blan  
Kombination SDH+ I  
blan  
Intrazerebrale Blutu  
blan  
blan  
Subarachnoidalblutun  
Kombination SAB+IC  
Subarachnoidalblutun  
blan  
blan  
Intrazerebrale Blutu  
blan  
Subarachnoidalblutun  
blan  
blan  
Kombination EDH+SA

blan

blan

blan

blan

blan

blan

blan

Subarachnoidalblutun

blan

Subarachnoidalblutun

blan

blan

blan

blan

blan

blan

blan

blan

blan

Intrazerebrale Blutu

blan

Intrazerebrale Blutu

Intrazerebrale Blutu

blan

Intrazerebrale Blutu

blan

blan

blan

Kombination SDH+SAB+IC

blan

Kombination SAB+IC

blan

blan

blan

Intrazerebrale Blutu

Subarachnoidalblutun

blan

blan

blan

blan

Subduralhämato

blan

blan

Subduralhämato

blan

blan

blan

blan

Intrazerebrale Blutu

blan

Kombination SDH+EDH+SA

blan

Kombination SDH+ I

blan

blan

blan

blan

blan

blan

Kombination SDH+SA

blan

blan

blan

blan

blan

Kombination SDH+SA

Kombination SDH+ I

blan

blan

Kombination SAB+ICB+ED

blan

Kombination SDH+SA

Epiduralhämato

Kombination SAB+IC

blan

blan

blan

blan

blan

Kombination SAB+IC

Intrazerebrale Blutu

blan

blan

blan

Kombination SDH+ I

blan

Kombination EDH+IC

Subarachnoidalblutun

blan

blan

blan

blan

blan

Kombination SDH+SAB+IC

blan

Kombination SDH+SA

blan

blan

blan

blan

blan

Kombination SAB+IC

blan

blan

blan

blan

blan

blan

blan

blan

Subduralhämato

blan

Subduralhämato

blan

blan

Intrazerebrale Blutu

blan

blan

blan

blan

blan

Subarachnoidalblutun

blan

blan

blan

Intrazerebrale Blutu

Kombination SDH+SAB+IC

blan

blan

blan

Subarachnoidalblutun

blan

blan

blan

Kombination SDH+SAB+IC

blan

blan

blan

Kombination SDH+EDH+SA

Kombination SDH+ED

blan

Kombination SDH+EDH+SA

blan

blan

blan

blan

blan

blan

Intrazerebrale Blutu

blan

Subarachnoidalblutun

blan

Kombination SDH+ I

blan

blan

Epiduralhämato

Intrazerebrale Blutu

blan

Kombination SAB+IC

blan

Subduralhämato

blan

Subduralhämato

Kombination EDH+SA

blan

Subduralhämatom

blan

Kombination SDH+SA

Kombination SDH+ED

blan

Kombination SDH+SA

blan

Intrazerebrale Blutung

blan

blan

blan

Epiduralhämatom

blan

blan

blan

Kombination SDH+SA

blan

blan

Kombination SAB+IC

blan



blan

Kombination SDH+SA

blan

blan

Subduralhämatō

blan

blan

Subduralhämatō

blan

Kombination SDH+ I

blan

blan

blan

blan

blan

blan

blan

Kombination SDH+ I

blan

Kombination SDH+SA

blan

Epiduralhämatō

blan

blan

blan

blan

Kombination SDH+ED

blan

Intrazerebrale Blutu

blan

blan

blan

Kombination SDH+ED

Kombination SDH+ED

blan

Kombination EDH+IC

blan

Intrazerebrale Blutu

Subarachnoidalblutun

blan

Kombination SDH+ED

Kombination SDH+SA

Kombination SDH+EDH+SA

blan

blan

blan

blan

blan

blan

Kombination SDH+SAB+IC

Subarachnoidalblutun

Intrazerebrale Blutu

blan

Kombination SAB+IC

blan

blan

blan

blan

Intrazerebrale Blutu

blan

blan

blan

blan

blan

blan

Kombination SDH+ I

Kombination SAB+IC

blan

Kombination SDH+SAB+IC

blan

blan

blan

blan

blan

blan

Kombination SDH+SAB+IC

Epiduralhämato

Subduralhämato

blan

blan

Kombination SAB+IC

blan

blan

Subduralhämato

blan

Subarachnoidalblutun

blan

blan

blan

Subarachnoidalblutun

blan

blan

Kombination SAB+IC

blan

blan

blan

Kombination EDH+IC

blan

blan

Kombination SAB+IC

blan

Subduralhämato

blan

Kombination SDH+EDH+SAB+IC

blan

blan

blan

Kombination SDH+SA

blan

blan

blan

blan

blan

Kombination SDH+ I

blan

blan

Kombination SAB+IC

blan

Kombination SDH+ I

blan

blan

Kombination SDH+ I

Epiduralhämato

blan

Kombination SDH+SA

Kombination SDH+SAB+IC

blan

blan

blan

Subduralhämato

| Komplikationen_Schaedel | abdominal_injuries | flesh_wound | SHT | AIS_Head |
|-------------------------|--------------------|-------------|-----|----------|
| keine                   | nein               | nein        | 1   | 1        |
|                         | nein               | ja          | 2   |          |
| keine                   | nein               | ja          | 1   | 1        |
| keine                   | nein               | nein        | 2   |          |
| keine                   | nein               | nein        | 2   |          |
| keine                   | nein               | nein        | 1   | 1        |
| keine                   | nein               | ja          | 1   | 1        |
| keine                   | nein               | nein        | 2   |          |
| keine                   | nein               | ja          | 1   | 1        |
| keine                   | nein               | ja          | 2   |          |
| keine                   | nein               | ja          | 1   | 1        |
| keine                   | nein               | nein        | 2   |          |
| keine                   | nein               | nein        | 2   |          |
| keine                   | nein               | ja          | 2   |          |
| Mittellinienverlagerung | nein               | ja          | 1   | 1        |
| keine                   | nein               | ja          | 1   | 1        |
| keine                   | nein               | ja          | 1   | 1        |
| keine                   | nein               | nein        | 2   |          |
| keine                   | nein               | ja          | 1   | 1        |
| keine                   | nein               | nein        | 2   |          |
| keine                   | nein               | ja          | 1   | 1        |
| keine                   | nein               | ja          | 1   | 1        |
| keine                   | nein               | nein        | 2   |          |
| keine                   | nein               | nein        | 2   |          |
| Mittellinienverlagerung | nein               | ja          | 1   | 1        |
|                         |                    |             | 2   |          |
| keine                   | nein               | ja          | 1   | 1        |
| keine                   | nein               | nein        | 2   |          |
| keine                   | nein               | nein        | 2   |          |
| keine                   | nein               | nein        | 1   | 1        |
| keine                   | nein               | ja          | 1   | 1        |
| kein                    | ne                 |             | 2   |          |
| kein                    | ne                 |             | 2   |          |
| kein                    | ne                 | ne          | 2   |          |
| kein                    | ne                 | ne          | 2   |          |
| kein                    | ne                 |             | 2   |          |
| kein                    | ne                 | ne          | 2   |          |
| Mittellinienverlagerun  | ne                 |             | 1   | 1        |
| kein                    | ne                 | ne          | 1   | 1        |
| kein                    | ne                 |             | 2   |          |
| kein                    | ne                 | ne          | 1   | 1        |
| kein                    | ne                 | ne          | 1   | 1        |
| kein                    | ne                 |             | 1   | 1        |
| kein                    | ne                 | ne          | 2   |          |
|                         | ne                 | ne          | 2   |          |

|                        |    |    |   |   |
|------------------------|----|----|---|---|
| kein                   | ne | ne | 2 |   |
| kein                   | ne | ne | 1 | 1 |
| kein                   | ne |    | 1 | 1 |
| kein                   | ne |    | 2 |   |
| kein                   | ne | ne | 1 | 1 |
| kein                   | ne | ne | 2 |   |
| kein                   | ne |    | 1 | 1 |
| kein                   | ne |    | 2 |   |
| kein                   | ne |    | 2 |   |
| kein                   | ne |    | 1 | 1 |
| kein                   |    |    | 1 | 1 |
| kein                   | ne |    | 1 | 1 |
| kein                   | ne | ne | 2 |   |
|                        | ne |    | 1 | 1 |
| kein                   | ne |    | 2 |   |
| kein                   | ne | ne | 1 | 1 |
| kein                   | ne |    | 2 |   |
|                        | ne | ne | 2 |   |
| kein                   | ne |    | 2 |   |
| kein                   | ne | ne | 1 | 1 |
|                        |    |    | 2 |   |
| kein                   | ne |    | 1 | 1 |
| kein                   | ne | ne | 1 | 1 |
| kein                   | ne | ne | 1 | 1 |
| kein                   | ne | ne | 2 |   |
| kein                   | ne | ne | 2 |   |
|                        | ne |    | 2 |   |
| kein                   | ne | ne | 1 | 1 |
| kein                   | ne |    | 1 | 1 |
| kein                   | ne |    | 1 | 1 |
|                        | ne | ne | 2 |   |
| kein                   | ne | ne | 2 |   |
| kein                   | ne |    | 1 | 1 |
| Mittellinienverlagerun | ne |    | 1 | 1 |
| kein                   | ne |    | 1 | 1 |
| kein                   | ne |    | 2 |   |
| kein                   | ne |    | 1 | 1 |
| kein                   | ne | ne | 2 |   |
| kein                   | ne |    | 1 | 1 |
| kein                   | ne | ne | 2 |   |
| kein                   | ne | ne | 2 |   |
|                        | ne | ne | 2 |   |
|                        |    |    | 1 | 1 |
| kein                   | ne |    | 1 | 1 |
| kein                   | ne |    | 2 |   |

|                        |    |    |   |   |
|------------------------|----|----|---|---|
| kein                   | ne |    | 1 | 1 |
| kein                   | ne | ne | 2 |   |
| kein                   | ne | ne | 2 |   |
| kein                   | ne |    | 1 | 1 |
| kein                   | ne |    | 1 | 1 |
| kein                   | ne | ne | 2 |   |
| kein                   | ne |    | 2 |   |
| Mittellinienverlagerun | ne |    | 1 | 1 |
| kein                   | ne |    | 1 | 1 |
|                        |    |    | 2 |   |
|                        | ne |    | 2 |   |
| kein                   | ne | ne | 2 |   |
| kein                   | ne |    | 1 | 1 |
| kein                   | ne |    | 2 |   |
| Mittellinienverlagerun | ne |    | 1 | 1 |
| kein                   | ne | ne | 2 |   |
| Mittellinienverlagerun | ne | ne | 1 | 1 |
| kein                   | ne |    | 1 | 1 |
| kein                   |    |    | 2 |   |
| kein                   | ne |    | 1 | 1 |
|                        | ne | ne | 2 |   |
| kein                   | ne |    | 2 |   |
| kein                   | ne |    | 2 |   |
| kein                   | ne | ne | 2 |   |
| kein                   | ne | ne | 2 |   |
| kein                   | ne | ne | 2 |   |
| kein                   | ne | ne | 2 |   |
| kein                   | ne | ne | 2 |   |
| kein                   | ne | ne | 1 | 1 |
| kein                   | ne | ne | 1 | 1 |
| kein                   | ne |    | 2 |   |
| kein                   | ne | ne | 2 |   |
|                        |    | ne | 2 |   |
| kein                   | ne |    | 2 |   |
| kein                   | ne |    | 1 | 1 |
| kein                   | ne |    | 1 | 1 |
| kein                   | ne |    | 1 | 1 |
| kein                   | ne |    | 1 | 1 |
| kein                   | ne |    | 2 |   |
|                        | ne | ne | 2 |   |
|                        |    |    | 2 |   |
| kein                   | ne |    | 1 | 1 |
| kein                   | ne |    | 1 | 1 |
| kein                   | ne | ne | 2 |   |
|                        |    |    | 2 |   |
| kein                   | ne |    | 2 |   |

|                        |    |    |   |   |
|------------------------|----|----|---|---|
| kein                   | ne | ne | 2 |   |
|                        |    |    | 1 | 1 |
| kein                   | ne |    | 2 |   |
| kein                   | ne | ne | 2 |   |
| kein                   | ne | ne | 1 | 1 |
|                        | ne | ne | 2 |   |
|                        |    |    | 2 |   |
| kein                   |    |    | 1 | 1 |
| kein                   | ne |    | 2 |   |
| kein                   | ne |    | 2 |   |
| kein                   | ne | ne | 2 |   |
| kein                   | ne | ne | 2 |   |
| kein                   | ne |    | 2 |   |
| kein                   | ne |    | 2 |   |
| kein                   | ne | ne | 1 | 1 |
| kein                   | ne | ne | 1 | 1 |
| kein                   |    |    | 2 |   |
| kein                   | ne |    | 1 | 1 |
| kein                   | ne |    | 2 |   |
| Mittellinienverlagerun | ne | ne | 1 | 1 |
| kein                   | ne |    | 2 |   |
| kein                   | ne |    | 1 | 1 |
| kein                   | ne |    | 1 | 1 |
| kein                   | ne | ne | 2 |   |
| kein                   | ne |    | 2 |   |
| kein                   | ne |    | 1 | 1 |
| kein                   | ne |    | 2 |   |
| kein                   | ne | ne | 2 |   |
| kein                   | ne |    | 1 | 1 |
| kein                   | ne | ne | 2 |   |
| kein                   | ne | ne | 2 |   |
| kein                   | ne |    | 2 |   |
| kein                   | ne |    | 2 |   |
| kein                   | ne |    | 2 |   |
| kein                   |    |    | 1 | 1 |
| kein                   | ne | ne | 2 |   |
| kein                   | ne | ne | 2 |   |
| kein                   | ne |    | 1 | 1 |



|      |    |    |   |   |
|------|----|----|---|---|
| kein | ne | ne | 2 |   |
| kein | ne | ne | 1 | 1 |
| kein |    |    | 1 | 1 |
| kein | ne |    | 1 | 1 |
| kein | ne | ne | 1 | 1 |
| kein | ne | ne | 2 |   |
| kein | ne |    | 2 |   |
| kein |    |    | 2 |   |
| kein | ne |    | 1 | 1 |
| kein | ne |    | 1 | 1 |
| kein | ne | ne | 2 |   |
|      | ne | ne | 2 |   |
| kein | ne |    | 2 |   |
| kein |    |    | 1 | 1 |
| kein | ne |    | 1 | 1 |
| kein | ne | ne | 2 |   |
|      | ne |    | 2 |   |
| kein | ne | ne | 2 |   |
| kein | ne |    | 1 | 1 |
|      | ne | ne | 2 |   |
| kein | ne | ne | 2 |   |
| kein | ne |    | 2 |   |
| kein | ne | ne | 2 |   |
|      | ne |    | 2 |   |
| kein | ne |    | 1 | 1 |
| kein | ne |    | 2 |   |
| kein | ne | ne | 2 |   |
| kein | ne |    | 1 | 1 |
| kein | ne |    | 2 |   |
| kein | ne | ne | 1 | 1 |
| kein | ne | ne | 2 |   |
| kein | ne |    | 2 |   |
| kein | ne |    | 1 | 1 |
| kein | ne |    | 1 | 1 |
| kein | ne | ne | 2 |   |
| kein | ne | ne | 2 |   |
| kein | ne |    | 1 | 1 |
| kein | ne |    | 2 |   |
| kein | ne |    | 1 | 1 |
| kein | ne |    | 1 | 1 |
| kein | ne | ne | 2 |   |
| kein | ne |    | 2 |   |

|                        |    |    |   |   |
|------------------------|----|----|---|---|
| kein                   | ne |    | 2 |   |
| kein                   | ne |    | 1 | 1 |
| kein                   | ne |    | 2 |   |
| kein                   | ne |    | 1 | 1 |
| kein                   | ne | ne | 2 |   |
| kein                   | ne |    | 2 |   |
| kein                   | ne |    | 1 | 1 |
| kein                   | ne |    | 2 |   |
| kein                   | ne |    | 1 | 1 |
| kein                   | ne | ne | 1 | 1 |
| kein                   | ne | ne | 2 |   |
| kein                   | ne |    | 1 | 1 |
| kein                   | ne | ne | 2 |   |
| kein                   | ne | ne | 2 |   |
| kein                   | ne |    | 1 | 1 |
| kein                   | ne | ne | 2 |   |
| kein                   | ne | ne | 2 |   |
|                        | ne |    | 2 |   |
| Mittellinienverlagerun | ne |    | 1 | 1 |
|                        | ne | ne | 2 |   |
| kein                   | ne |    | 1 | 1 |
| kein                   | ne |    | 1 | 1 |
| kein                   | ne |    | 2 |   |
| kein                   | ne | ne | 2 |   |
| kein                   | ne |    | 1 | 1 |
| kein                   | ne |    | 1 | 1 |
| kein                   |    |    | 2 |   |
| kein                   | ne |    | 2 |   |
| kein                   | ne |    | 1 | 1 |
|                        | ne |    | 2 |   |
|                        | ne |    | 1 | 1 |
| kein                   | ne | ne | 2 |   |
|                        | ne |    | 2 |   |
|                        |    | ne | 2 |   |
| kein                   | ne | ne | 2 |   |
|                        | ne |    | 2 |   |
| kein                   | ne |    | 1 | 1 |
| kein                   | ne |    | 2 |   |
| kein                   | ne |    | 2 |   |
| kein                   | ne |    | 1 | 1 |
| kein                   | ne |    | 1 | 1 |
| kein                   | ne |    | 1 | 1 |
| kein                   | ne |    | 2 |   |
|                        |    |    | 2 |   |
| kein                   |    |    | 2 |   |

|      |    |    |   |   |
|------|----|----|---|---|
| kein | ne |    | 1 | 1 |
| kein |    |    | 1 | 1 |
| kein | ne |    | 1 | 1 |
| kein | ne |    | 1 | 1 |
| kein | ne |    | 1 | 1 |
| kein | ne |    | 1 | 1 |
| kein | ne |    | 2 |   |
| kein | ne |    | 1 | 1 |
| kein | ne |    | 1 | 1 |
| kein | ne |    | 1 | 1 |
| kein |    |    | 1 | 1 |
| kein | ne | ne | 2 |   |
| kein |    |    | 1 | 1 |
| kein | ne | ne | 2 |   |
| kein | ne |    | 2 |   |
| kein | ne |    | 2 |   |
|      | ne | ne | 2 |   |
| kein |    |    | 1 | 1 |
| kein | ne |    | 1 | 1 |
| kein | ne |    | 2 |   |
| kein | ne |    | 2 |   |
| kein | ne |    | 2 |   |
| kein | ne | ne | 1 | 1 |
| kein | ne |    | 1 | 1 |
| kein |    |    | 1 | 1 |
|      | ne | ne | 2 |   |
| kein | ne |    | 1 | 1 |
| kein | ne | ne | 1 | 1 |
| kein | ne |    | 2 |   |
| kein | ne |    | 2 |   |
| kein | ne |    | 1 | 1 |
| kein | ne |    | 2 |   |
| kein | ne | ne | 1 | 1 |
| kein | ne | ne | 2 |   |
| kein | ne | ne | 1 | 1 |
| kein | ne | ne | 2 |   |
| kein |    |    | 2 |   |
| kein | ne |    | 2 |   |
| kein | ne |    | 1 | 1 |
| kein | ne |    | 1 | 1 |
| kein |    |    | 2 |   |
| kein |    |    | 2 |   |
| kein | ne |    | 2 |   |
| kein | ne |    | 1 | 1 |
| kein | ne |    | 1 | 1 |
| kein | ne |    | 2 |   |

|                        |    |    |   |   |
|------------------------|----|----|---|---|
| kein                   | ne |    | 2 |   |
| kein                   | ne |    | 2 |   |
| kein                   | ne | ne | 2 |   |
| kein                   | ne | ne | 2 |   |
| kein                   | ne | ne | 2 |   |
| kein                   | ne |    | 2 |   |
| kein                   | ne |    | 2 |   |
| kein                   | ne |    | 2 |   |
| kein                   | ne |    | 1 | 1 |
| kein                   |    |    | 2 |   |
|                        | ne |    | 2 |   |
|                        | ne | ne | 2 |   |
| Mittellinienverlagerun | ne |    | 1 | 1 |
| kein                   | ne | ne | 2 |   |
| kein                   |    | ne | 2 |   |
| kein                   | ne |    | 2 |   |
| kein                   | ne |    | 1 | 1 |
| kein                   | ne |    | 1 | 1 |
| kein                   | ne |    | 1 | 1 |
| kein                   | ne |    | 1 | 1 |
| kein                   | ne |    | 2 |   |
| kein                   | ne | ne | 1 | 1 |
| kein                   | ne | ne | 2 |   |
| kein                   | ne |    | 1 | 1 |
| kein                   | ne |    | 1 | 1 |
| kein                   | ne |    | 2 |   |
| kein                   | ne | ne | 2 |   |
| kein                   |    | ne | 2 |   |
| kein                   |    |    | 2 |   |
| kein                   | ne |    | 2 |   |
| kein                   | ne |    | 1 | 1 |
| kein                   | ne |    | 2 |   |
| kein                   | ne |    | 2 |   |
| kein                   | ne |    | 2 |   |
| Ventrikelleinbruc      | ne |    | 1 | 1 |
| kein                   | ne | ne | 1 | 1 |
| kein                   | ne |    | 1 | 1 |
| kein                   | ne |    | 1 | 1 |
| kein                   | ne |    | 1 | 1 |
| kein                   | ne | ne | 1 | 1 |
| kein                   | ne |    | 1 | 1 |
| kein                   | ne | ne | 1 | 1 |
| kein                   | ne | ne | 2 |   |
| kein                   | ne | ne | 2 |   |
| kein                   | ne |    | 2 |   |
| kein                   | ne | ne | 2 |   |

|                                               |    |    |   |   |
|-----------------------------------------------|----|----|---|---|
| kein                                          |    |    | 1 | 1 |
| kein                                          | ne | ne | 2 |   |
|                                               | ne |    | 1 | 1 |
| kein                                          | ne |    | 2 |   |
| kein                                          | ne | ne | 2 |   |
| kein                                          | ne | ne | 2 |   |
|                                               | ne |    | 2 |   |
|                                               | ne |    | 1 | 1 |
| kein                                          | ne |    | 1 | 1 |
| kein                                          | ne | ne | 1 | 1 |
| kein                                          | ne |    | 2 |   |
| kein                                          | ne |    | 2 |   |
| kein                                          | ne | ne | 2 |   |
| kein                                          | ne |    | 2 |   |
| kein                                          | ne | ne | 1 | 1 |
| kein                                          | ne | ne | 1 | 1 |
| kein                                          | ne | ne | 2 |   |
| kein                                          | ne |    | 2 |   |
| kein                                          | ne |    | 1 | 1 |
| kein                                          | ne |    | 1 | 1 |
| Mittellinienverlagerung+Ventrikel<br>einbruch | ne | ne | 1 | 1 |
| kein                                          | ne | ne | 2 |   |
|                                               | ne | ne | 2 |   |
| kein                                          | ne |    | 1 | 1 |
| kein                                          | ne |    | 1 | 1 |
| kein                                          | ne | ne | 2 |   |
| kein                                          | ne | ne | 2 |   |
| kein                                          | ne |    | 1 | 1 |
| Mittellinienverlagerung+Ventrikel<br>einbruch | ne |    | 1 | 1 |
|                                               | ne |    | 2 |   |
|                                               | ne |    | 2 |   |
|                                               | ne | ne | 2 |   |
| kein                                          | ne |    | 1 | 1 |
| kein                                          | ne |    | 2 |   |
| kein                                          | ne |    | 2 |   |
| kein                                          | ne | ne | 2 |   |
| kein                                          | ne |    | 2 |   |
| kein                                          | ne |    | 2 |   |
| kein                                          | ne | ne | 2 |   |
| kein                                          | ne |    | 1 | 1 |
| kein                                          | ne | ne | 2 |   |
|                                               | ne |    | 2 |   |
| kein                                          | ne | ne | 2 |   |
| kein                                          | ne |    | 1 | 1 |
| kein                                          | ne |    | 1 | 1 |

|                        |    |    |   |   |
|------------------------|----|----|---|---|
| kein                   | ne |    | 1 | 1 |
| kein                   | ne | ne | 1 | 1 |
| kein                   | ne |    | 2 |   |
| kein                   | ne |    | 1 | 1 |
| kein                   | ne |    | 1 | 1 |
| kein                   | ne |    | 1 | 1 |
| kein                   | ne |    | 1 | 1 |
| kein                   | ne |    | 1 | 1 |
| kein                   | ne |    | 1 | 1 |
| kein                   | ne |    | 2 |   |
|                        |    |    | 2 |   |
|                        |    | ne | 2 |   |
| Mittellinienverlagerun | ne | ne | 1 | 1 |
| kein                   | ne | ne | 2 |   |
| kein                   | ne |    | 2 |   |
| kein                   | ne |    | 1 | 1 |
| kein                   | ne |    | 1 | 1 |
| kein                   | ne |    | 1 | 1 |
| kein                   | ne | ne | 2 |   |
| kein                   |    |    | 1 | 1 |
| kein                   |    |    | 1 | 1 |
| kein                   | ne |    | 1 | 1 |
| kein                   | ne |    | 2 |   |
| kein                   | ne |    | 1 | 1 |
|                        | ne |    | 2 |   |
| kein                   | ne | ne | 1 | 1 |
| kein                   | ne |    | 1 | 1 |
| kein                   | ne |    | 1 | 1 |
| kein                   | ne | ne | 2 |   |
| kein                   | ne |    | 1 | 1 |
| kein                   | ne | ne | 1 | 1 |
| kein                   | ne |    | 1 | 1 |
| kein                   | ne |    | 1 | 1 |
| kein                   | ne | ne | 1 | 1 |
| kein                   | ne |    | 1 | 1 |
|                        | ne | ne | 2 |   |
| kein                   | ne |    | 2 |   |
| kein                   | ne |    | 1 | 1 |
| kein                   | ne | ne | 2 |   |
| Mittellinienverlagerun | ne |    | 1 | 1 |
| kein                   | ne |    | 1 | 1 |
| kein                   | ne |    | 1 | 1 |
| kein                   | ne |    | 2 |   |
| kein                   | ne |    | 1 | 1 |
| kein                   | ne |    | 2 |   |

|                                            |    |    |   |   |
|--------------------------------------------|----|----|---|---|
| kein                                       | ne |    | 1 | 1 |
| Ventrikel einbruch                         | ne |    | 1 | 1 |
| kein                                       | ne |    | 1 | 1 |
| kein                                       | ne |    | 1 | 1 |
| kein                                       |    |    | 1 | 1 |
| kein                                       | ne | ne | 1 | 1 |
| kein                                       | ne |    | 1 | 1 |
| kein                                       | ne | ne | 2 |   |
| kein                                       | ne |    | 2 |   |
| kein                                       | ne | ne | 1 | 1 |
| kein                                       | ne |    | 1 | 1 |
| kein                                       | ne |    | 2 |   |
| kein                                       | ne |    | 2 |   |
| kein                                       | ne |    | 2 |   |
| Ventrikel einbruch                         | ne | ne | 1 | 1 |
| kein                                       | ne |    | 1 | 1 |
| kein                                       | ne |    | 1 | 1 |
| Mittellinienverlagerun                     | ne |    | 1 | 1 |
| kein                                       | ne | ne | 1 | 1 |
| kein                                       | ne |    | 1 | 1 |
| kein                                       | ne | ne | 2 |   |
| kein                                       | ne |    | 1 | 1 |
| kein                                       | ne |    | 1 | 1 |
| kein                                       | ne | ne | 2 |   |
| Ventrikel einbruch                         | ne |    | 1 | 1 |
| kein                                       | ne |    | 1 | 1 |
| kein                                       | ne |    | 2 |   |
| kein                                       | ne |    | 2 |   |
| kein                                       | ne |    | 1 | 1 |
| Mittellinienverlagerung+Ventrikel einbruch | ne | ne | 1 | 1 |
| kein                                       |    |    | 1 | 1 |
| kein                                       | ne | ne | 1 | 1 |
|                                            | ne |    | 2 |   |
| kein                                       | ne |    | 2 |   |
| kein                                       | ne |    | 2 |   |
| kein                                       | ne |    | 1 | 1 |
| kein                                       | ne | ne | 2 |   |
| kein                                       | ne | ne | 2 |   |
| kein                                       | ne | ne | 2 |   |
|                                            |    |    | 2 |   |
| kein                                       | ne |    | 1 | 1 |
| kein                                       | ne | ne | 2 |   |
| kein                                       | ne |    | 1 | 1 |
| kein                                       | ne |    | 1 | 1 |
| kein                                       |    |    | 1 | 1 |
| kein                                       |    |    | 1 | 1 |

|                         |    |    |   |   |
|-------------------------|----|----|---|---|
| kein                    | ne |    | 1 | 1 |
|                         | ne |    | 2 |   |
| kein                    | ne |    | 1 | 1 |
| kein                    | ne |    | 1 | 1 |
| kein                    | ne |    | 2 |   |
| kein                    | ne |    | 1 | 1 |
| kein                    | ne |    | 2 |   |
| kein                    | ne |    | 2 |   |
| kein                    | ne |    | 1 | 1 |
| Ventrikel einbruch      |    | ne | 1 | 1 |
| Mittellinienverlagerung | ne |    | 1 | 1 |
| kein                    | ne |    | 1 | 1 |
| kein                    | ne | ne | 2 |   |
| kein                    | ne | ne | 1 | 1 |
| kein                    | ne |    | 2 |   |
| Ventrikel einbruch      |    |    | 1 | 1 |
| kein                    |    |    | 2 |   |
| kein                    |    | ne | 1 | 1 |
| kein                    | ne | ne | 2 |   |
| kein                    | ne | ne | 2 |   |
| kein                    |    | ne | 2 |   |
| kein                    | ne | ne | 2 |   |
| kein                    | ne |    | 2 |   |
| kein                    | ne |    | 1 | 1 |
| kein                    | ne |    | 2 |   |
| kein                    | ne |    | 2 |   |
| kein                    | ne |    | 1 | 1 |
| kein                    | ne | ne | 2 |   |
| kein                    | ne | ne | 2 |   |
| kein                    | ne |    | 2 |   |
| kein                    | ne |    | 1 | 1 |
| kein                    | ne |    | 1 | 1 |
| kein                    | ne | ne | 1 | 1 |
| Mittellinienverlagerung | ne | ne | 2 |   |
| kein                    | ne | ne | 1 | 1 |
| kein                    | ne | ne | 2 |   |
| kein                    | ne |    | 2 |   |
| kein                    | ne | ne | 2 |   |
| kein                    | ne |    | 2 |   |
| kein                    | ne | ne | 2 |   |
| kein                    | ne |    | 1 | 1 |
| kein                    | ne |    | 2 |   |
| kein                    | ne |    | 1 | 1 |
| kein                    | ne | ne | 2 |   |
| kein                    | ne |    | 2 |   |
| kein                    | ne | ne | 1 | 1 |



|                        |    |    |   |   |
|------------------------|----|----|---|---|
| kein                   | ne |    | 2 |   |
| Mittellinienverlagerun | ne | ne | 1 | 1 |
| Ventrikelinbruc        | ne |    | 1 | 1 |
| kein                   | ne | ne | 2 |   |
| kein                   | ne |    | 1 | 1 |
| kein                   | ne |    | 1 | 1 |
| kein                   | ne |    | 2 |   |
| kein                   | ne | ne | 2 |   |
| kein                   | ne | ne | 1 | 1 |
| kein                   | ne |    | 2 |   |
| kein                   | ne | ne | 2 |   |
| kein                   | ne |    | 1 | 1 |
| kein                   | ne |    | 2 |   |
| kein                   | ne |    | 2 |   |
| kein                   | ne | ne | 2 |   |
| kein                   | ne |    | 1 | 1 |
| kein                   | ne |    | 2 |   |
| kein                   | ne | ne | 2 |   |
| kein                   | ne | ne | 2 |   |
| kein                   | ne |    | 1 | 1 |
| kein                   | ne |    | 1 | 1 |
| kein                   | ne |    | 1 | 1 |
| kein                   | ne | ne | 2 |   |
| kein                   | ne | ne | 2 |   |
| kein                   | ne |    | 2 |   |
| kein                   | ne |    | 1 | 1 |
| kein                   | ne |    | 2 |   |
| kein                   | ne |    | 1 | 1 |
| kein                   | ne | ne | 1 | 1 |
| kein                   | ne |    | 2 |   |
| kein                   | ne |    | 1 | 1 |
| kein                   | ne |    | 1 | 1 |
| kein                   | ne | ne | 2 |   |
| Mittellinienverlagerun | ne |    | 1 | 1 |
| kein                   | ne | ne | 2 |   |
| kein                   | ne |    | 1 | 1 |
| kein                   |    | ne | 2 |   |
| kein                   | ne |    | 1 | 1 |
| kein                   | ne |    | 1 | 1 |
| kein                   | ne | ne | 2 |   |
| kein                   | ne |    | 1 | 1 |
| kein                   | ne |    | 1 | 1 |

|      |    |    |   |   |
|------|----|----|---|---|
| kein | ne |    | 1 | 1 |
| kein | ne |    | 1 | 1 |
| kein | ne |    | 1 | 1 |
| kein | ne | ne | 2 |   |
| kein | ne |    | 1 | 1 |
| kein | ne |    | 2 |   |
| kein | ne |    | 1 | 1 |
| kein | ne |    | 1 | 1 |
| kein | ne |    | 1 | 1 |
| kein |    | ne | 2 |   |
| kein | ne |    | 2 |   |
| kein | ne |    | 2 |   |
| kein | ne |    | 1 | 1 |
| kein | ne |    | 1 | 1 |
| kein |    |    | 2 |   |
| kein | ne |    | 1 | 1 |
| kein | ne | ne | 2 |   |
| kein | ne |    | 2 |   |
| kein | ne | ne | 2 |   |
| kein |    |    | 1 | 1 |
| kein | ne |    | 1 | 1 |
| kein | ne |    | 2 |   |
| kein | ne |    | 2 |   |
| kein | ne |    | 2 |   |
| kein | ne |    | 2 |   |
| kein | ne |    | 2 |   |
| kein | ne |    | 2 |   |
| kein | ne | ne | 2 |   |
| kein | ne |    | 2 |   |
| kein | ne | ne | 2 |   |
|      | ne |    | 1 | 1 |
| kein | ne |    | 2 |   |
| kein | ne | ne | 2 |   |
| kein | ne |    | 1 | 1 |
| kein | ne | ne | 2 |   |
| kein | ne |    | 1 | 1 |
| kein | ne |    | 1 | 1 |
| kein |    | ne | 2 |   |
| kein | ne |    | 1 | 1 |
| kein |    |    | 1 | 1 |
| kein | ne |    | 2 |   |
| kein |    |    | 1 | 1 |
| kein | ne |    | 1 | 1 |
| kein |    |    | 2 |   |
| kein | ne |    | 1 | 1 |
| kein | ne |    | 2 |   |

|                        |    |    |   |   |
|------------------------|----|----|---|---|
| kein                   | ne | ne | 1 | 1 |
| kein                   | ne |    | 1 | 1 |
| kein                   | ne |    | 1 | 1 |
| kein                   | ne |    | 1 | 1 |
| kein                   | ne |    | 2 |   |
| kein                   | ne | ne | 2 |   |
| kein                   | ne | ne | 2 |   |
| kein                   | ne | ne | 2 |   |
| kein                   | ne | ne | 2 |   |
| kein                   | ne |    | 2 |   |
| Mittellinienverlagerun | ne | ne | 1 | 1 |
| kein                   | ne |    | 2 |   |
| kein                   |    |    | 1 | 1 |
| kein                   | ne | ne | 1 | 1 |
| kein                   | ne |    | 2 |   |
| kein                   | ne | ne | 2 |   |
| kein                   |    |    | 1 | 1 |
| kein                   | ne |    | 1 | 1 |
| kein                   | ne |    | 2 |   |
| kein                   | ne | ne | 2 |   |
| kein                   | ne |    | 2 |   |
| kein                   | ne | ne | 2 |   |
| kein                   | ne |    | 2 |   |
| kein                   | ne | ne | 2 |   |
| kein                   | ne | ne | 2 |   |
| kein                   | ne |    | 1 | 1 |
| kein                   | ne |    | 1 | 1 |
| kein                   | ne |    | 1 | 1 |
| kein                   | ne |    | 2 |   |
| kein                   | ne | ne | 2 |   |
| kein                   | ne |    | 1 | 1 |
| kein                   | ne |    | 1 | 1 |
| kein                   | ne |    | 2 |   |
| kein                   | ne | ne | 2 |   |
| kein                   |    |    | 1 | 1 |
| kein                   |    |    | 1 | 1 |
| kein                   | ne |    | 2 |   |
|                        | ne |    | 2 |   |
| kein                   | ne | ne | 2 |   |
| kein                   | ne |    | 2 |   |
| kein                   | ne |    | 1 | 1 |

|                        |    |    |   |   |
|------------------------|----|----|---|---|
| kein                   | ne |    | 2 |   |
| kein                   | ne |    | 1 | 1 |
| kein                   | ne |    | 1 | 1 |
| kein                   | ne | ne | 2 |   |
| kein                   | ne | ne | 1 | 1 |
| kein                   | ne |    | 2 |   |
| kein                   | ne |    | 1 | 1 |
| kein                   | ne |    | 1 | 1 |
| kein                   | ne |    | 1 | 1 |
| kein                   | ne |    | 1 | 1 |
| kein                   | ne | ne | 2 |   |
| kein                   | ne |    | 1 | 1 |
| kein                   | ne |    | 1 | 1 |
| kein                   | ne |    | 2 |   |
| kein                   | ne | ne | 1 | 1 |
| kein                   | ne | ne | 2 |   |
| Ventrikelinbruc        |    |    | 1 | 1 |
| kein                   | ne |    | 2 |   |
| kein                   | ne |    | 1 | 1 |
|                        | ne | ne | 2 |   |
| kein                   | ne |    | 2 |   |
| kein                   | ne | ne | 1 | 1 |
| kein                   | ne | ne | 1 | 1 |
| kein                   | ne |    | 1 | 1 |
| kein                   | ne | ne | 2 |   |
|                        | ne |    | 2 |   |
| kein                   | ne |    | 1 | 1 |
| kein                   |    |    | 2 |   |
| kein                   | ne |    | 1 | 1 |
| kein                   | ne |    | 2 |   |
| kein                   | ne |    | 2 |   |
| Mittellinienverlagerun | ne |    | 1 | 1 |
| kein                   | ne | ne | 2 |   |
| kein                   | ne |    | 2 |   |
| kein                   | ne |    | 1 | 1 |
| kein                   | ne |    | 1 | 1 |
| kein                   | ne |    | 1 | 1 |
| kein                   | ne |    | 2 |   |
| kein                   | ne |    | 1 | 1 |
| kein                   | ne |    | 1 | 1 |
| kein                   | ne |    | 2 |   |
| kein                   | ne |    | 2 |   |
| kein                   |    |    | 1 | 1 |
| kein                   |    |    | 1 | 1 |
| kein                   | ne |    | 1 | 1 |

|                        |    |    |   |   |
|------------------------|----|----|---|---|
| kein                   | ne |    | 1 | 1 |
| kein                   | ne |    | 1 | 1 |
| kein                   | ne |    | 1 | 1 |
| Mittellinienverlagerun | ne |    | 1 | 1 |
| kein                   | ne | ne | 2 |   |
| kein                   | ne |    | 1 | 1 |
| kein                   | ne |    | 1 | 1 |
| kein                   | ne |    | 2 |   |
| kein                   |    |    | 1 | 1 |
| kein                   | ne |    | 1 | 1 |
| kein                   | ne | ne | 2 |   |
| kein                   |    |    | 1 | 1 |
| kein                   | ne |    | 2 |   |
| kein                   | ne | ne | 1 | 1 |
| kein                   | ne | ne | 2 |   |
| kein                   | ne | ne | 2 |   |
| kein                   | ne |    | 2 |   |
|                        | ne |    | 1 | 1 |
| kein                   | ne |    | 2 |   |
| kein                   | ne | ne | 2 |   |
| kein                   | ne |    | 2 |   |
| kein                   | ne | ne | 2 |   |
|                        | ne |    | 1 | 1 |
| kein                   |    |    | 1 | 1 |
| kein                   | ne |    | 1 | 1 |
| kein                   | ne |    | 1 | 1 |
| kein                   | ne |    | 2 |   |
| kein                   | ne |    | 2 |   |
| kein                   | ne |    | 2 |   |
| kein                   |    | ne | 2 |   |
| kein                   | ne |    | 1 | 1 |
| kein                   | ne | ne | 2 |   |
| kein                   | ne |    | 2 |   |
| kein                   | ne |    | 1 | 1 |
| kein                   | ne |    | 1 | 1 |
| kein                   | ne |    | 2 |   |
| kein                   | ne |    | 2 |   |
| kein                   |    |    | 2 |   |
|                        | ne | ne | 2 |   |
| kein                   | ne | ne | 2 |   |
| kein                   | ne |    | 1 | 1 |
| kein                   | ne |    | 2 |   |
| kein                   |    |    | 1 | 1 |
| kein                   |    |    | 2 |   |
| kein                   | ne |    | 1 | 1 |

|                        |    |    |   |   |
|------------------------|----|----|---|---|
| kein                   | ne |    | 1 | 1 |
| kein                   | ne |    | 1 | 1 |
| kein                   | ne |    | 2 |   |
| kein                   |    | ne | 2 |   |
| kein                   | ne |    | 1 | 1 |
| kein                   | ne | ne | 2 |   |
| kein                   | ne | ne | 2 |   |
| kein                   |    |    | 2 |   |
| Mittellinienverlagerun |    |    | 1 | 1 |
| Ventrikelleinbruc      | ne | ne | 1 | 1 |
| kein                   | ne | ne | 1 | 1 |
| kein                   | ne |    | 2 |   |
| kein                   | ne |    | 1 | 1 |
| kein                   |    |    | 1 | 1 |
| kein                   | ne |    | 2 |   |
| kein                   | ne |    | 1 | 1 |
| kein                   | ne |    | 2 |   |
| kein                   | ne | ne | 1 | 1 |
| kein                   | ne |    | 1 | 1 |
| kein                   | ne | ne | 2 |   |
| kein                   | ne | ne | 1 | 1 |
| kein                   | ne |    | 2 |   |
| kein                   | ne |    | 1 | 1 |
| kein                   | ne |    | 1 | 1 |
| kein                   | ne | ne | 1 | 1 |
| kein                   | ne |    | 1 | 1 |
| kein                   | ne |    | 2 |   |
| kein                   | ne |    | 2 |   |
| kein                   | ne | ne | 2 |   |
| kein                   |    |    | 1 | 1 |
| kein                   | ne |    | 2 |   |
| kein                   | ne | ne | 1 | 1 |
| kein                   | ne | ne | 2 |   |
| kein                   | ne |    | 1 | 1 |
| kein                   | ne | ne | 2 |   |
| kein                   | ne |    | 1 | 1 |
| kein                   | ne | ne | 2 |   |
| kein                   | ne |    | 1 | 1 |
| kein                   | ne |    | 2 |   |
| kein                   |    |    | 2 |   |
| Mittellinienverlagerun | ne | ne | 1 | 1 |
| kein                   | ne | ne | 1 | 1 |
| kein                   | ne |    | 1 | 1 |
| kein                   | ne |    | 2 |   |

|      |    |    |   |   |
|------|----|----|---|---|
| kein | ne |    | 1 | 1 |
| kein | ne |    | 1 | 1 |
| kein | ne |    | 2 |   |
| kein | ne |    | 2 |   |
| kein | ne | ne | 2 |   |
| kein |    |    | 1 | 1 |
|      | ne |    | 2 |   |
| kein | ne | ne | 2 |   |
| kein | ne |    | 1 | 1 |
| kein | ne |    | 2 |   |
| kein | ne |    | 1 | 1 |
| kein | ne |    | 1 | 1 |
| kein | ne |    | 1 | 1 |
|      | ne | ne | 2 |   |
| kein |    | ne | 2 |   |
| kein | ne | ne | 2 |   |
| kein | ne | ne | 2 |   |
| kein | ne |    | 2 |   |
| kein | ne |    | 1 | 1 |
| kein | ne |    | 1 | 1 |
| kein | ne | ne | 2 |   |
| kein | ne |    | 1 | 1 |
| kein | ne |    | 1 | 1 |
| kein | ne |    | 2 |   |
|      |    |    | 2 |   |
| kein |    |    | 1 | 1 |
| kein | ne |    | 1 | 1 |
| kein |    |    | 1 | 1 |
| kein | ne | ne | 1 | 1 |
| kein | ne | ne | 2 |   |
| kein |    |    | 1 | 1 |
| kein | ne |    | 1 | 1 |
| kein | ne |    | 2 |   |
| kein | ne |    | 1 | 1 |
| kein | ne |    | 1 | 1 |
| kein | ne |    | 1 | 1 |
| kein | ne |    | 1 | 1 |
| kein | ne |    | 1 | 1 |
| kein | ne |    | 1 | 1 |
| kein | ne | ne | 2 |   |
| kein | ne |    | 1 | 1 |
| kein | ne |    | 2 |   |
| kein | ne |    | 2 |   |

|                        |    |    |   |   |
|------------------------|----|----|---|---|
| kein                   | ne |    | 1 | 1 |
| kein                   | ne |    | 1 | 1 |
| kein                   |    |    | 1 | 1 |
| kein                   | ne | ne | 2 |   |
| Mittellinienverlagerun | ne |    | 1 | 1 |
| kein                   | ne |    | 1 | 1 |
| kein                   | ne | ne | 2 |   |
| kein                   |    |    | 1 | 1 |
| kein                   | ne |    | 2 |   |
| kein                   | ne | ne | 2 |   |
| kein                   | ne | ne | 1 | 1 |
| kein                   | ne |    | 2 |   |
| kein                   | ne |    | 2 |   |
| kein                   | ne |    | 1 | 1 |
| kein                   | ne |    | 2 |   |
| Mittellinienverlagerun | ne | ne | 1 | 1 |
| kein                   | ne |    | 1 | 1 |
| kein                   | ne |    | 1 | 1 |
| kein                   | ne |    | 2 |   |
| kein                   | ne |    | 1 | 1 |
| kein                   |    | ne | 1 | 1 |
| kein                   | ne |    | 2 |   |
| kein                   |    |    | 2 |   |
| kein                   | ne |    | 1 | 1 |
| kein                   | ne | ne | 2 |   |
| kein                   | ne | ne | 2 |   |
| kein                   | ne | ne | 2 |   |
| kein                   | ne | ne | 2 |   |
| kein                   | ne | ne | 2 |   |
| kein                   | ne |    | 1 | 1 |
| kein                   | ne |    | 2 |   |
| kein                   | ne |    | 1 | 1 |
| kein                   | ne |    | 1 | 1 |
| kein                   | ne |    | 1 | 1 |
| kein                   | ne |    | 2 |   |
| kein                   |    |    | 1 | 1 |
| kein                   |    |    | 1 | 1 |
| kein                   | ne |    | 2 |   |
| kein                   | ne |    | 1 | 1 |
| kein                   | ne |    | 1 | 1 |
| kein                   | ne |    | 1 | 1 |
| kein                   | ne | ne | 1 | 1 |
| kein                   | ne | ne | 2 |   |
| kein                   | ne | ne | 2 |   |
| kein                   | ne |    | 1 | 1 |



|      |    |    |   |   |
|------|----|----|---|---|
| kein | ne | ne | 2 |   |
| kein | ne |    | 1 | 1 |
| kein | ne |    | 1 | 1 |
| kein | ne |    | 1 | 1 |
| kein | ne | ne | 2 |   |
|      |    |    | 2 |   |
| kein | ne | ne | 2 |   |
| kein | ne |    | 2 |   |
|      |    |    | 2 |   |
| kein |    |    | 1 | 1 |
| kein | ne |    | 2 |   |
| kein | ne |    | 1 | 1 |
| kein |    |    | 1 | 1 |
| kein | ne |    | 2 |   |
| kein | ne |    | 1 | 1 |
| kein | ne | ne | 1 | 1 |
| kein | ne | ne | 2 |   |
| kein | ne |    | 1 | 1 |
| kein | ne |    | 2 |   |
| kein | ne |    | 1 | 1 |
| kein | ne |    | 2 |   |
| kein | ne | ne | 1 | 1 |
| kein | ne |    | 1 | 1 |
| kein | ne |    | 2 |   |
| kein | ne |    | 2 |   |
| kein | ne | ne | 2 |   |
| kein |    | ne | 2 |   |
| kein | ne | ne | 2 |   |
| kein | ne | ne | 2 |   |
| kein | ne |    | 2 |   |
| kein | ne |    | 2 |   |
| kein |    |    | 2 |   |
| kein | ne |    | 1 | 1 |
| kein | ne |    | 1 | 1 |
| kein | ne | ne | 2 |   |
| kein | ne |    | 2 |   |
| kein | ne | ne | 1 | 1 |
| kein | ne |    | 1 | 1 |
| kein | ne |    | 2 |   |
| kein | ne |    | 1 | 1 |
| kein | ne | ne | 2 |   |
|      | ne |    | 2 |   |
| kein | ne |    | 2 |   |
| kein | ne |    | 1 | 1 |
| kein |    |    | 1 | 1 |
| kein | ne | ne | 2 |   |

|                        |    |    |   |   |
|------------------------|----|----|---|---|
| kein                   | ne |    | 1 | 1 |
| kein                   |    |    | 1 | 1 |
| kein                   | ne |    | 2 |   |
| kein                   | ne | ne | 2 |   |
| Ventrikel einbruch     | ne | ne | 1 | 1 |
| kein                   | ne |    | 1 | 1 |
| kein                   | ne | ne | 2 |   |
| kein                   | ne |    | 1 | 1 |
| kein                   | ne |    | 2 |   |
| kein                   | ne |    | 2 |   |
| Mittellinienverlagerun | ne | ne | 1 | 1 |
| kein                   |    | ne | 2 |   |
| kein                   | ne | ne | 1 | 1 |
| kein                   | ne |    | 1 | 1 |
| kein                   | ne | ne | 1 | 1 |
| kein                   |    |    | 2 |   |
| kein                   | ne | ne | 2 |   |
| kein                   | ne |    | 2 |   |
| kein                   | ne | ne | 1 | 1 |
| kein                   | ne |    | 1 | 1 |
| kein                   | ne | ne | 1 | 1 |
| kein                   |    | ne | 2 |   |
| kein                   | ne |    | 1 | 1 |
| kein                   | ne |    | 1 | 1 |
| kein                   | ne |    | 2 |   |
| kein                   | ne |    | 2 |   |
| kein                   | ne | ne | 2 |   |
| kein                   | ne |    | 2 |   |
| kein                   | ne | ne | 2 |   |
| kein                   | ne |    | 2 |   |
| kein                   | ne | ne | 2 |   |
| kein                   | ne | ne | 1 | 1 |
| kein                   | ne | ne | 2 |   |
| kein                   | ne |    | 1 | 1 |
| kein                   | ne |    | 2 |   |
| kein                   | ne |    | 1 | 1 |
| kein                   | ne |    | 2 |   |
| kein                   | ne |    | 1 | 1 |
| kein                   | ne |    | 1 | 1 |
| kein                   | ne | ne | 2 |   |
| kein                   | ne |    | 1 | 1 |
| kein                   | ne | ne | 1 | 1 |
| kein                   | ne | ne | 1 | 1 |
| kein                   | ne |    | 2 |   |
| kein                   | ne |    | 1 | 1 |
| kein                   | ne | ne | 1 | 1 |
| kein                   | ne | ne | 1 | 1 |
| kein                   | ne |    | 2 |   |
| kein                   | ne |    | 1 | 1 |

|                        |    |    |   |   |
|------------------------|----|----|---|---|
| kein                   | ne | ne | 1 | 1 |
| kein                   | ne | ne | 2 |   |
| kein                   | ne | ne | 1 | 1 |
| kein                   | ne | ne | 1 | 1 |
| kein                   | ne | ne | 2 |   |
| kein                   | ne |    | 1 | 1 |
| Mittellinienverlagerun | ne | ne | 1 | 1 |
| kein                   | ne | ne | 1 | 1 |
| kein                   | ne | ne | 2 |   |
| kein                   | ne |    | 2 |   |
| kein                   | ne | ne | 2 |   |
| kein                   | ne |    | 2 |   |
| kein                   | ne |    | 1 | 1 |
| Ventrikelleinbruc      | ne | ne | 1 | 1 |
| kein                   | ne | ne | 2 |   |
| kein                   |    | ne | 2 |   |
|                        | ne | ne | 2 |   |
| kein                   | ne | ne | 2 |   |
| kein                   | ne | ne | 1 | 1 |
| kein                   | ne | ne | 2 |   |
| kein                   |    |    | 1 | 1 |
| Mittellinienverlagerun | ne | ne | 1 | 1 |
| kein                   | ne |    | 2 |   |
| kein                   | ne | ne | 2 |   |
| kein                   | ne |    | 1 | 1 |
| kein                   | ne |    | 1 | 1 |
| kein                   | ne |    | 2 |   |
| kein                   | ne | ne | 1 | 1 |
| kein                   |    |    | 2 |   |
| Ventrikelleinbruc      | ne |    | 1 | 1 |
| kein                   | ne |    | 1 | 1 |
|                        | ne |    | 2 |   |
| kein                   | ne | ne | 1 | 1 |
| kein                   | ne |    | 2 |   |
| kein                   | ne |    | 2 |   |
| kein                   | ne | ne | 1 | 1 |
| kein                   | ne | ne | 1 | 1 |
| kein                   | ne |    | 1 | 1 |
| kein                   | ne |    | 1 | 1 |
| kein                   | ne |    | 1 | 1 |
| kein                   | ne | ne | 2 |   |
| kein                   | ne |    | 1 | 1 |
| kein                   | ne |    | 1 | 1 |
| kein                   | ne | ne | 2 |   |
| kein                   | ne |    | 2 |   |

|                        |    |    |   |   |
|------------------------|----|----|---|---|
| kein                   | ne |    | 1 | 1 |
| kein                   | ne | ne | 2 |   |
| kein                   | ne |    | 1 | 1 |
| kein                   | ne |    | 1 | 1 |
|                        |    | ne | 1 | 1 |
| kein                   | ne | ne | 1 | 1 |
| kein                   | ne |    | 1 | 1 |
| kein                   | ne | ne | 2 |   |
| kein                   | ne |    | 1 | 1 |
| kein                   | ne |    | 1 | 1 |
| kein                   | ne | ne | 1 | 1 |
| kein                   | ne |    | 2 |   |
| kein                   |    |    | 2 |   |
| kein                   | ne | ne | 1 | 1 |
| kein                   | ne |    | 1 | 1 |
| kein                   | ne | ne | 1 | 1 |
| kein                   | ne | ne | 2 |   |
| kein                   | ne |    | 2 |   |
|                        | ne | ne | 2 |   |
| kein                   | ne |    | 1 | 1 |
| kein                   |    |    | 2 |   |
|                        | ne | ne | 2 |   |
|                        | ne |    | 1 | 1 |
| kein                   | ne | ne | 2 |   |
| kein                   | ne |    | 2 |   |
| kein                   | ne | ne | 2 |   |
| Mittellinienverlagerun | ne |    | 1 | 1 |
| kein                   | ne | ne | 2 |   |
| kein                   | ne |    | 2 |   |
| kein                   | ne |    | 1 | 1 |
| Mittellinienverlagerun | ne |    | 1 | 1 |
| kein                   | ne | ne | 1 | 1 |
| kein                   | ne | ne | 2 |   |
| kein                   | ne |    | 1 | 1 |
| kein                   | ne |    | 1 | 1 |
| kein                   |    | ne | 2 |   |
| kein                   | ne | ne | 1 | 1 |
| kein                   | ne |    | 1 | 1 |
| kein                   | ne | ne | 2 |   |
| kein                   | ne | ne | 2 |   |
| kein                   | ne | ne | 1 | 1 |
| kein                   | ne |    | 1 | 1 |
| kein                   |    |    | 1 | 1 |
| kein                   | ne | ne | 2 |   |

|                                          |    |    |   |   |
|------------------------------------------|----|----|---|---|
| kein                                     | ne |    | 1 | 1 |
| kein                                     | ne | ne | 2 |   |
| kein                                     | ne | ne | 2 |   |
| Mittellinienverlagerung+Ventrikelinbruch |    | ne | 1 | 1 |
| kein                                     | ne |    | 1 | 1 |
| kein                                     | ne |    | 1 | 1 |
| kein                                     | ne |    | 1 | 1 |
| kein                                     |    |    | 2 |   |
| kein                                     | ne | ne | 2 |   |
| kein                                     | ne | ne | 2 |   |
| kein                                     | ne |    | 2 |   |
| kein                                     | ne | ne | 1 | 1 |
| kein                                     | ne | ne | 2 |   |
| kein                                     | ne | ne | 2 |   |
| kein                                     | ne |    | 2 |   |
| kein                                     | ne |    | 1 | 1 |
| kein                                     |    |    | 2 |   |
| kein                                     | ne | ne | 2 |   |
| kein                                     | ne | ne | 2 |   |
| kein                                     | ne | ne | 2 |   |
| kein                                     | ne |    | 1 | 1 |
| kein                                     | ne |    | 1 | 1 |
| kein                                     | ne | ne | 2 |   |
| kein                                     | ne | ne | 2 |   |
| kein                                     | ne |    | 2 |   |
| kein                                     | ne |    | 2 |   |
| kein                                     |    |    | 1 | 1 |
| kein                                     | ne | ne | 2 |   |
| kein                                     | ne | ne | 2 |   |
| Mittellinienverlagerun                   | ne | ne | 2 |   |
| kein                                     | ne |    | 1 | 1 |
| Mittellinienverlagerun                   | ne |    | 1 | 1 |
| kein                                     | ne |    | 1 | 1 |
| kein                                     |    | ne | 2 |   |
| kein                                     |    |    | 1 | 1 |
| kein                                     | ne |    | 2 |   |
| kein                                     | ne |    | 1 | 1 |
| kein                                     | ne |    | 1 | 1 |
| kein                                     | ne |    | 2 |   |
| kein                                     | ne |    | 2 |   |
| kein                                     | ne |    | 2 |   |
| kein                                     | ne | ne | 2 |   |
| kein                                     | ne |    | 1 | 1 |
| kein                                     | ne |    | 2 |   |
| kein                                     | ne |    | 1 | 1 |
| kein                                     | ne |    | 2 |   |

|                        |    |    |   |   |
|------------------------|----|----|---|---|
| kein                   | ne |    | 1 | 1 |
| kein                   | ne | ne | 1 | 1 |
| kein                   | ne |    | 1 | 1 |
| kein                   |    | ne | 1 | 1 |
| Mittellinienverlagerun | ne | ne | 1 | 1 |
| kein                   | ne |    | 1 | 1 |
| kein                   | ne |    | 1 | 1 |
| kein                   | ne |    | 1 | 1 |
| kein                   | ne |    | 1 | 1 |
| kein                   | ne |    | 2 |   |
| kein                   | ne |    | 1 | 1 |
| kein                   | ne | ne | 2 |   |
| kein                   | ne |    | 2 |   |
| kein                   |    |    | 1 | 1 |
| kein                   | ne |    | 2 |   |
| kein                   | ne | ne | 2 |   |
| kein                   | ne | ne | 2 |   |
| kein                   | ne |    | 1 | 1 |
| kein                   | ne |    | 1 | 1 |
| kein                   | ne |    | 2 |   |
| kein                   | ne |    | 1 | 1 |
| kein                   | ne | ne | 2 |   |
| kein                   | ne |    | 2 |   |
| kein                   | ne | ne | 2 |   |
| kein                   | ne | ne | 2 |   |
| kein                   | ne |    | 1 | 1 |
| kein                   | ne | ne | 2 |   |
| kein                   | ne |    | 2 |   |
| kein                   | ne |    | 1 | 1 |
| kein                   | ne |    | 1 | 1 |
| kein                   | ne | ne | 2 |   |
| kein                   | ne |    | 2 |   |
| kein                   | ne |    | 1 | 1 |
|                        | ne |    | 2 |   |
| kein                   | ne |    | 1 | 1 |
| kein                   | ne |    | 1 | 1 |
| kein                   | ne | ne | 2 |   |
| kein                   | ne |    | 1 | 1 |
| kein                   | ne | ne | 2 |   |

|                        |    |    |   |   |
|------------------------|----|----|---|---|
| kein                   | ne |    | 1 | 1 |
| kein                   | ne |    | 1 | 1 |
| kein                   | ne | ne | 2 |   |
| kein                   | ne |    | 2 |   |
| kein                   | ne |    | 1 | 1 |
|                        | ne | ne | 2 |   |
| kein                   | ne |    | 1 | 1 |
| kein                   | ne | ne | 2 |   |
| Mittellinienverlagerun | ne |    | 1 | 1 |
| kein                   | ne | ne | 2 |   |
| Mittellinienverlagerun | ne | ne | 1 | 1 |
| kein                   | ne |    | 1 | 1 |
| kein                   | ne |    | 1 | 1 |
| kein                   | ne |    | 2 |   |
| kein                   | ne |    | 2 |   |
| kein                   | ne |    | 2 |   |
| kein                   |    |    | 2 |   |
| kein                   | ne |    | 1 | 1 |
| kein                   | ne |    | 1 | 1 |
| kein                   | ne | ne | 2 |   |
| kein                   | ne | ne | 2 |   |
| kein                   |    |    | 2 |   |
| kein                   | ne | ne | 2 |   |
| kein                   | ne |    | 1 | 1 |
| kein                   | ne | ne | 2 |   |
| kein                   | ne |    | 2 |   |
| kein                   | ne | ne | 2 |   |
| kein                   | ne | ne | 2 |   |
| kein                   | ne |    | 1 | 1 |
| Mittellinienverlagerun | ne |    | 1 | 1 |
| kein                   | ne |    | 1 | 1 |
| kein                   | ne | ne | 1 | 1 |
| kein                   | ne |    | 2 |   |
| kein                   | ne | ne | 2 |   |
| kein                   |    |    | 2 |   |
| kein                   | ne | ne | 2 |   |
| kein                   | ne |    | 1 | 1 |
| kein                   | ne | ne | 2 |   |
| kein                   | ne |    | 1 | 1 |
| kein                   | ne |    | 1 | 1 |
| kein                   | ne |    | 2 |   |
| kein                   | ne | ne | 1 | 1 |
| kein                   | ne |    | 1 | 1 |
| Mittellinienverlagerun |    |    | 1 | 1 |
| kein                   | ne |    | 2 |   |
| kein                   | ne |    | 2 |   |

|                                   |    |    |   |   |
|-----------------------------------|----|----|---|---|
| kein                              | ne | ne | 2 |   |
| kein                              | ne |    | 1 | 1 |
| kein                              |    |    | 1 | 1 |
| kein                              | ne |    | 1 | 1 |
| kein                              | ne |    | 1 | 1 |
| Mittellinienverlagerun            | ne |    | 1 | 1 |
| Mittellinienverlagerung+Ventrikel | ne |    | 1 | 1 |
| kein                              | ne |    | 1 | 1 |
| kein                              | ne |    | 1 | 1 |
| kein                              | ne | ne | 2 |   |
|                                   |    |    | 2 |   |
| kein                              |    |    | 2 |   |
| kein                              | ne | ne | 2 |   |
| kein                              | ne | ne | 2 |   |
| kein                              | ne |    | 1 | 1 |
| kein                              | ne |    | 1 | 1 |
| kein                              | ne | ne | 1 | 1 |
| kein                              | ne |    | 1 | 1 |
| kein                              | ne |    | 2 |   |
| kein                              | ne | ne | 2 |   |
| kein                              | ne |    | 2 |   |
| kein                              | ne |    | 1 | 1 |
| kein                              | ne |    | 1 | 1 |
| kein                              | ne | ne | 2 |   |
|                                   | ne | ne | 2 |   |
| kein                              | ne |    | 2 |   |
| kein                              | ne |    | 2 |   |
| kein                              | ne |    | 1 | 1 |
| kein                              | ne |    | 2 |   |
| kein                              | ne | ne | 2 |   |
| kein                              | ne | ne | 2 |   |
| kein                              | ne |    | 2 |   |
| kein                              | ne |    | 1 | 1 |
| kein                              | ne | ne | 1 | 1 |
| kein                              | ne |    | 1 | 1 |
| kein                              | ne | ne | 2 |   |
| kein                              | ne |    | 2 |   |
| kein                              | ne |    | 1 | 1 |
| Ventrikel                         | ne |    | 1 | 1 |
| kein                              | ne |    | 2 |   |
| kein                              | ne |    | 1 | 1 |
| kein                              | ne |    | 1 | 1 |
| kein                              | ne |    | 2 |   |
| kein                              | ne |    | 1 | 1 |



|                        |    |    |   |   |
|------------------------|----|----|---|---|
| kein                   | ne |    | 2 |   |
| kein                   | ne |    | 2 |   |
|                        | ne |    | 2 |   |
| kein                   | ne |    | 1 | 1 |
| kein                   |    |    | 2 |   |
| kein                   | ne |    | 2 |   |
| kein                   | ne |    | 1 | 1 |
| kein                   | ne | ne | 1 | 1 |
| kein                   | ne |    | 1 | 1 |
| Mittellinienverlagerun | ne | ne | 1 | 1 |
| kein                   | ne | ne | 2 |   |
| kein                   | ne |    | 2 |   |
| kein                   | ne |    | 2 |   |
| kein                   |    |    | 2 |   |
| kein                   | ne |    | 1 | 1 |
| kein                   | ne |    | 1 | 1 |
| kein                   | ne |    | 1 | 1 |
| Mittellinienverlagerun | ne |    | 1 | 1 |
| Mittellinienverlagerun | ne |    | 1 | 1 |
| kein                   | ne |    | 2 |   |
| kein                   |    |    | 1 | 1 |
| kein                   | ne |    | 1 | 1 |
| kein                   | ne |    | 1 | 1 |
| kein                   | ne | ne | 2 |   |
| kein                   | ne |    | 1 | 1 |
| kein                   |    |    | 1 | 1 |
| kein                   | ne |    | 1 | 1 |
| kein                   | ne | ne | 2 |   |
| kein                   | ne | ne | 2 |   |
| kein                   | ne |    | 2 |   |
| kein                   | ne |    | 1 | 1 |
| kein                   | ne |    | 2 |   |
| kein                   | ne | ne | 2 |   |
| kein                   | ne |    | 1 | 1 |
| kein                   | ne |    | 1 | 1 |
| kein                   | ne | ne | 2 |   |
| kein                   | ne |    | 2 |   |
| kein                   | ne | ne | 1 | 1 |
| kein                   | ne |    | 2 |   |
| kein                   |    |    | 2 |   |
|                        | ne |    | 1 | 1 |
| kein                   | ne |    | 1 | 1 |
| kein                   | ne |    | 2 |   |
| kein                   |    |    | 2 |   |
| kein                   | ne |    | 1 | 1 |
| kein                   |    |    | 2 |   |

|                        |    |    |   |   |
|------------------------|----|----|---|---|
| kein                   | ne |    | 2 |   |
| kein                   | ne | ne | 2 |   |
| kein                   | ne | ne | 1 | 1 |
| kein                   | ne |    | 2 |   |
| kein                   | ne | ne | 2 |   |
| kein                   | ne |    | 1 | 1 |
| kein                   | ne | ne | 2 |   |
| kein                   | ne | ne | 2 |   |
| Mittellinienverlagerun | ne |    | 1 | 1 |
| kein                   | ne |    | 2 |   |
| kein                   | ne |    | 2 |   |
| kein                   | ne |    | 1 | 1 |
| kein                   | ne |    | 2 |   |
| kein                   | ne |    | 1 | 1 |
| kein                   |    |    | 1 | 1 |
| kein                   | ne | ne | 2 |   |
| kein                   |    | ne | 2 |   |
| kein                   | ne | ne | 1 | 1 |
| kein                   |    |    | 1 | 1 |
| kein                   | ne | ne | 2 |   |
| kein                   | ne |    | 1 | 1 |
| kein                   | ne | ne | 2 |   |
| Mittellinienverlagerun | ne |    | 1 | 1 |
| kein                   | ne |    | 2 |   |
| kein                   | ne |    | 1 | 1 |
| kein                   |    | ne | 1 | 1 |
| kein                   | ne |    | 1 | 1 |
| kein                   | ne |    | 1 | 1 |
| kein                   | ne |    | 1 | 1 |
| Mittellinienverlagerun | ne |    | 1 | 1 |
| kein                   |    |    | 1 | 1 |
| kein                   | ne |    | 1 | 1 |
| kein                   | ne |    | 1 | 1 |
| Mittellinienverlagerun | ne |    | 1 | 1 |

| AIS_Score_Head | AIS_Face | AIS_Score_Face | AIS_Spine | AIS_Score_Spine | AIS_Thorax | AIS_Score_Thorax |
|----------------|----------|----------------|-----------|-----------------|------------|------------------|
| 1              |          |                | 1         | 2               |            |                  |
| 3              | 1        | 1              |           |                 |            |                  |
|                |          |                | 1         | 2               |            |                  |
| 1              | 1        | 1              |           |                 |            |                  |
| 3              | 1        | 1              |           |                 | 1          | 2                |
| 1              | 1        | 2              |           |                 |            |                  |
|                |          |                |           |                 | 1          | 1                |
| 1              | 1        | 1              |           |                 |            |                  |
|                |          |                | 1         | 2               |            |                  |
|                |          |                |           |                 | 1          | 1                |
| 4              |          |                |           |                 |            |                  |
| 1              | 1        | 2              |           |                 |            |                  |
| 1              | 1        | 1              |           |                 |            |                  |
|                | 1        | 1              |           |                 |            |                  |
| 3              | 1        | 2              |           |                 |            |                  |
|                | 1        | 2              |           |                 |            |                  |
| 5              |          |                |           |                 |            |                  |
| 3              | 1        | 2              |           |                 |            |                  |
|                |          |                | 1         | 1               |            |                  |
| 4              |          |                |           |                 |            |                  |
| 1              |          |                |           |                 | 1          | 3                |
| 3              | 1        | 2              |           |                 |            |                  |
| 3              |          |                |           |                 |            |                  |
|                | 1        | 3              |           |                 | 1          | 3                |
|                | 1        | 2              |           |                 |            |                  |
|                |          |                | 1         | 2               |            |                  |
| 4              | 1        | 2              |           |                 |            |                  |
| 3              |          |                |           |                 |            |                  |
|                | 1        | 1              |           |                 |            |                  |
| 1              |          |                | 1         | 2               |            |                  |
| 2              |          |                |           |                 |            |                  |
| 1              | 1        | 1              |           |                 |            |                  |

|   |   |   |   |   |   |   |   |   |
|---|---|---|---|---|---|---|---|---|
| 3 |   |   |   |   |   |   |   |   |
| 3 | 1 | 1 |   |   |   |   |   |   |
|   | 1 | 1 |   |   |   |   |   |   |
| 2 |   |   |   |   |   |   |   |   |
|   | 1 | 1 |   |   |   |   |   |   |
| 1 |   |   | 1 | 1 |   |   |   |   |
|   | 1 | 1 |   |   |   |   | 1 | 1 |
|   | 1 | 1 | 2 |   |   |   |   |   |
| 1 | 1 | 1 | 1 |   |   |   |   |   |
| 1 |   |   |   | 1 | 3 | 1 |   | 3 |
| 1 | 1 | 2 |   |   |   |   |   |   |
|   | 1 | 2 |   |   |   |   |   |   |
| 3 | 1 | 1 |   |   |   |   |   |   |
|   | 1 | 1 |   |   |   |   |   |   |
| 2 |   |   | 1 | 3 |   |   |   |   |
|   | 1 | 1 |   |   |   |   |   |   |
|   |   |   | 1 | 3 |   |   |   |   |
|   | 1 | 2 |   |   |   |   |   |   |
| 2 |   |   |   |   |   |   |   |   |
| 3 |   |   |   |   |   |   |   |   |
| 3 | 1 | 2 |   |   |   |   |   |   |
| 3 |   |   | 1 | 2 | 1 |   |   | 3 |
|   |   |   |   | 1 | 1 |   |   |   |
|   |   |   |   |   |   | 1 |   | 1 |
| 3 |   |   |   |   |   | 1 |   | 3 |
| 3 |   |   |   |   |   |   |   |   |
| 1 |   |   |   |   |   |   |   |   |
|   | 1 | 2 |   |   |   |   |   |   |
| 3 |   |   |   |   |   | 1 |   | 1 |
| 3 | 1 | 1 |   |   |   | 1 |   | 1 |
| 2 | 1 | 2 |   |   |   |   |   |   |
|   | 1 | 1 |   |   |   | 1 |   | 3 |
| 3 | 1 | 1 |   |   |   |   |   |   |
|   |   |   |   |   |   |   | 1 | 1 |
|   |   |   |   | 1 | 1 |   |   |   |
|   |   |   |   |   |   |   | 1 | 1 |
| 3 |   |   | 1 | 3 |   | 1 |   | 3 |
| 3 |   |   |   |   |   | 1 |   | 5 |

|   |   |   |  |   |  |   |  |   |   |
|---|---|---|--|---|--|---|--|---|---|
| 3 | 1 | 1 |  |   |  |   |  |   |   |
|   |   |   |  |   |  |   |  | 1 | 2 |
| 3 | 1 | 1 |  |   |  |   |  |   |   |
| 1 |   |   |  |   |  |   |  |   |   |
|   |   |   |  | 1 |  | 1 |  |   |   |
|   | 1 | 1 |  |   |  |   |  |   |   |
| 5 |   |   |  |   |  |   |  |   |   |
| 1 |   |   |  |   |  |   |  | 1 | 1 |
|   |   |   |  |   |  |   |  | 1 | 2 |
|   |   |   |  |   |  |   |  |   |   |
| 1 |   |   |  |   |  |   |  |   |   |
|   | 1 | 1 |  |   |  |   |  |   |   |
| 5 |   |   |  |   |  |   |  |   |   |
|   |   |   |  |   |  |   |  |   |   |
| 5 |   |   |  |   |  |   |  |   |   |
| 4 |   |   |  |   |  |   |  |   |   |
|   |   |   |  |   |  |   |  |   |   |
|   |   |   |  | 1 |  | 3 |  |   |   |
| 1 |   |   |  | 1 |  | 5 |  |   |   |
|   |   |   |  | 1 |  | 3 |  |   |   |
|   | 1 | 1 |  |   |  |   |  |   |   |
|   |   |   |  | 1 |  | 1 |  |   |   |
|   |   |   |  |   |  |   |  |   |   |
|   | 1 | 1 |  |   |  |   |  |   |   |
|   |   |   |  |   |  |   |  | 1 | 3 |
|   |   |   |  |   |  |   |  | 1 | 3 |
| 1 |   |   |  | 1 |  | 1 |  |   |   |
| 1 |   |   |  | 1 |  | 1 |  |   |   |
|   |   |   |  |   |  |   |  |   |   |
|   |   |   |  | 1 |  | 1 |  | 1 | 3 |
|   |   |   |  |   |  |   |  |   |   |
| 2 |   |   |  |   |  |   |  |   |   |
| 2 |   |   |  | 1 |  | 2 |  | 1 | 2 |
| 3 |   |   |  |   |  |   |  | 1 | 3 |
| 1 | 1 | 2 |  |   |  |   |  |   |   |
|   |   |   |  | 1 |  | 3 |  |   |   |
|   |   |   |  |   |  |   |  | 1 | 1 |
|   |   |   |  |   |  |   |  |   |   |
| 1 |   |   |  |   |  |   |  |   |   |
| 1 | 1 | 2 |  |   |  |   |  |   |   |
|   | 1 | 2 |  |   |  |   |  |   |   |
|   |   |   |  |   |  |   |  |   |   |
|   | 1 | 1 |  |   |  |   |  |   |   |

|   |   |   |   |  |   |   |   |
|---|---|---|---|--|---|---|---|
| 2 | 1 | 3 |   |  |   |   |   |
|   | 1 | 1 |   |  |   |   |   |
| 3 |   |   |   |  |   | 1 | 1 |
|   | 1 | 1 | 1 |  | 3 |   |   |
| 4 | 1 | 2 | 1 |  | 2 | 1 | 2 |
|   |   |   |   |  |   | 1 | 1 |
|   |   |   | 1 |  | 5 |   |   |
|   |   |   |   |  |   | 1 | 1 |
| 2 |   |   |   |  |   | 1 | 2 |
| 2 |   |   |   |  |   |   |   |
|   | 1 | 1 |   |  |   |   |   |
|   | 1 | 1 |   |  |   |   |   |
|   |   |   | 1 |  | 3 |   |   |
|   |   |   | 1 |  | 3 |   |   |
|   |   |   |   |  |   | 1 | 5 |
| 2 |   |   | 1 |  | 2 |   |   |
| 1 |   |   | 1 |  | 3 | 1 | 3 |
|   | 1 | 1 |   |  |   | 1 | 2 |
| 4 |   |   | 1 |  | 2 | 1 | 4 |
|   | 1 | 1 |   |  |   |   |   |
| 4 |   |   |   |  |   | 1 | 2 |
| 3 | 1 | 1 |   |  |   |   |   |
| 2 |   |   |   |  |   |   |   |
|   |   |   | 1 |  | 2 | 1 | 3 |
|   | 1 | 2 | 1 |  | 1 |   |   |
| 3 | 1 | 2 |   |  |   |   |   |
|   |   |   |   |  |   | 1 | 1 |
| 3 | 1 | 1 |   |  |   |   |   |
|   |   |   | 1 |  | 3 |   |   |
|   |   |   | 1 |  | 2 |   |   |
|   |   |   |   |  |   | 1 | 2 |
|   |   |   |   |  |   | 1 | 1 |
| 2 | 1 | 1 |   |  |   |   |   |
|   |   |   | 1 |  | 3 |   |   |
|   |   |   | 1 |  | 3 | 1 | 2 |
| 3 |   |   |   |  |   |   |   |

|   |   |   |   |   |   |   |   |
|---|---|---|---|---|---|---|---|
| 1 | 1 | 2 |   |   |   |   |   |
| 3 | 1 | 2 |   |   |   | 1 | 3 |
| 1 |   |   |   |   |   |   |   |
| 4 |   |   |   |   |   |   |   |
|   | 1 | 1 | 1 | 2 | 1 |   | 3 |
|   |   |   |   |   | 1 |   | 1 |
| 2 |   |   | 1 | 2 | 1 |   | 1 |
| 2 | 1 | 1 |   |   |   |   |   |
|   |   |   | 1 | 1 |   |   |   |
|   |   |   | 1 | 1 |   |   |   |
| 1 |   |   |   |   |   |   |   |
| 1 |   |   |   |   |   |   |   |
|   | 1 | 1 |   |   |   |   |   |
|   |   |   |   |   |   |   |   |
|   |   |   | 1 | 2 | 1 |   | 3 |
| 2 |   |   | 1 | 2 |   |   |   |
|   |   |   | 1 | 1 |   |   |   |
|   |   |   | 1 | 1 |   |   |   |
|   |   |   |   |   |   | 1 | 1 |
|   |   |   |   |   |   | 1 | 1 |
| 3 | 1 | 1 |   |   |   |   |   |
|   |   |   |   |   |   |   |   |
| 1 | 1 | 1 |   |   |   | 1 | 1 |
|   |   |   |   |   |   | 1 | 1 |
| 1 |   |   |   |   |   | 1 | 1 |
|   |   |   |   |   |   | 1 | 2 |
|   |   |   | 1 | 2 | 1 |   | 3 |
| 2 | 1 | 2 |   |   |   |   |   |
| 3 |   |   |   |   |   |   |   |
|   | 1 | 1 |   |   |   | 1 | 1 |
|   |   |   |   |   |   |   |   |
| 1 |   |   | 1 | 2 | 1 |   | 2 |
| 3 |   |   |   |   |   |   |   |
|   |   |   | 1 | 1 | 1 |   | 1 |
|   |   |   | 1 | 2 |   |   |   |
| 1 | 1 | 2 |   |   |   |   |   |
|   |   |   |   |   |   | 1 | 1 |
| 2 | 1 | 2 |   |   |   |   |   |
| 1 | 1 | 2 |   |   |   |   |   |
|   |   |   |   |   |   |   |   |
|   |   |   | 1 | 2 | 1 |   | 2 |
|   |   |   | 1 | 2 |   |   |   |

|   |   |   |   |   |  |   |   |
|---|---|---|---|---|--|---|---|
|   |   |   |   |   |  | 1 | 2 |
| 2 | 1 | 1 |   |   |  | 1 | 2 |
| 1 | 1 | 1 |   |   |  |   |   |
|   |   |   | 1 | 2 |  |   |   |
| 2 |   |   | 1 | 1 |  |   |   |
|   | 1 | 2 | 1 | 2 |  |   |   |
| 1 |   |   |   |   |  |   |   |
| 3 | 1 | 2 |   |   |  |   |   |
| 3 |   |   |   |   |  | 1 | 2 |
|   | 1 | 1 |   |   |  |   |   |
| 3 | 1 | 2 |   |   |  | 1 | 1 |
|   |   |   |   |   |  | 1 | 3 |
|   |   |   |   |   |  | 1 | 3 |
| 3 |   |   |   |   |  | 1 | 2 |
|   |   |   | 1 | 1 |  | 1 | 1 |
|   |   |   | 1 | 4 |  |   |   |
| 4 |   |   | 1 | 2 |  | 1 | 3 |
|   |   |   | 1 | 3 |  |   |   |
| 3 | 1 | 2 | 1 | 2 |  |   |   |
| 5 |   |   |   |   |  |   |   |
|   |   |   |   |   |  |   |   |
| 3 |   |   |   |   |  | 1 | 2 |
| 3 | 1 | 2 | 1 | 1 |  | 1 | 3 |
|   |   |   |   |   |  | 1 | 2 |
| 3 |   |   |   |   |  |   |   |
|   |   |   |   |   |  |   |   |
| 2 |   |   |   |   |  | 1 | 3 |
|   |   |   | 1 | 5 |  |   |   |
|   |   |   |   |   |  | 1 | 1 |
|   |   |   | 1 | 2 |  |   |   |
| 2 |   |   | 1 | 2 |  | 1 | 3 |
|   | 1 | 2 | 1 | 5 |  |   |   |
|   |   |   | 1 | 2 |  |   |   |
| 1 | 1 | 1 | 1 | 2 |  | 1 | 1 |
| 3 |   |   |   |   |  |   |   |
| 3 | 1 | 1 |   |   |  |   |   |
|   |   |   |   |   |  | 1 | 4 |
|   | 1 | 1 | 1 | 2 |  | 1 | 3 |



|   |   |   |  |   |   |   |   |
|---|---|---|--|---|---|---|---|
| 2 |   |   |  |   |   | 1 | 3 |
| 1 |   |   |  |   |   | 1 | 5 |
| 1 |   |   |  |   |   | 1 | 1 |
| 1 |   |   |  |   |   |   |   |
| 3 | 1 | 1 |  |   |   |   |   |
| 5 |   |   |  |   |   |   |   |
|   |   |   |  | 1 | 2 |   |   |
| 1 |   |   |  |   |   |   |   |
| 3 | 1 | 2 |  |   |   |   |   |
| 3 |   |   |  | 1 | 2 |   |   |
| 1 |   |   |  |   |   | 1 | 1 |
|   |   |   |  |   |   |   |   |
| 1 |   |   |  | 1 | 2 | 1 | 5 |
|   |   |   |  | 1 | 2 |   |   |
|   |   |   |  | 1 | 2 |   |   |
|   |   |   |  | 1 | 1 | 1 | 3 |
|   |   |   |  |   |   | 1 | 1 |
| 4 | 1 | 2 |  |   |   | 1 | 2 |
| 2 |   |   |  | 1 | 2 | 1 | 2 |
|   |   |   |  |   |   |   |   |
|   |   |   |  | 1 | 1 |   |   |
|   |   |   |  |   |   | 1 | 1 |
| 4 |   |   |  |   |   |   |   |
| 3 | 1 | 1 |  |   |   |   |   |
| 4 |   |   |  | 1 | 1 | 1 | 4 |
|   |   |   |  | 1 | 2 |   |   |
| 1 |   |   |  | 1 | 2 |   |   |
| 5 |   |   |  |   |   |   |   |
|   |   |   |  | 1 | 1 |   |   |
|   |   |   |  |   |   |   |   |
| 2 |   |   |  | 1 | 2 |   |   |
|   |   |   |  | 1 | 2 | 1 | 3 |
| 3 |   |   |  |   |   |   |   |
|   |   |   |  |   |   | 1 | 3 |
| 2 |   |   |  |   |   |   |   |
|   |   |   |  | 1 | 1 |   |   |
|   |   |   |  | 1 | 1 |   |   |
| 3 | 1 | 2 |  |   |   | 1 | 1 |
| 2 | 1 | 1 |  | 1 | 2 | 1 | 3 |
|   |   |   |  |   |   | 1 | 5 |
|   |   |   |  | 1 | 2 | 1 | 3 |
|   |   |   |  |   |   | 1 | 2 |
| 3 | 1 | 1 |  |   |   | 1 | 1 |
| 1 |   |   |  |   |   |   |   |

|   |   |   |   |   |   |   |
|---|---|---|---|---|---|---|
|   |   |   | 1 | 2 | 1 | 1 |
|   |   |   | 1 | 3 |   |   |
|   |   |   |   |   | 1 | 3 |
|   | 1 | 1 |   |   |   |   |
|   | 1 | 1 |   |   |   |   |
|   | 1 | 1 |   |   | 1 | 2 |
| 2 |   |   | 1 | 5 | 1 | 3 |
|   |   |   |   |   |   |   |
| 4 | 1 | 1 |   |   | 1 | 4 |
|   |   |   |   |   | 1 | 2 |
|   |   |   |   |   |   |   |
| 2 |   |   |   |   |   |   |
| 1 | 1 | 1 | 1 | 5 | 1 | 3 |
| 3 | 1 | 1 |   |   |   |   |
| 3 | 1 | 1 |   |   |   |   |
|   | 1 | 1 |   |   |   |   |
| 3 | 1 | 1 |   |   | 1 | 3 |
|   |   |   |   |   | 1 | 2 |
| 3 | 1 | 1 | 1 | 1 |   |   |
| 3 |   |   |   |   | 1 | 3 |
|   |   |   | 1 | 2 |   |   |
|   |   |   | 1 | 2 | 1 | 3 |
|   | 1 | 1 | 1 | 2 | 1 | 5 |
|   |   |   |   |   |   |   |
| 1 | 1 | 1 |   |   |   |   |
|   | 1 | 1 |   |   | 1 | 1 |
|   |   |   | 1 | 2 |   |   |
|   |   |   | 1 | 2 |   |   |
| 3 |   |   | 1 | 1 | 1 | 3 |
| 3 |   |   | 1 | 3 |   |   |
| 3 | 1 | 1 |   |   |   |   |
| 2 |   |   |   |   |   |   |
| 3 | 1 | 1 |   |   |   |   |
| 5 |   |   | 1 | 2 | 1 | 4 |
| 3 | 1 | 1 | 1 | 1 | 1 | 1 |
| 3 |   |   |   |   |   |   |
|   |   |   | 1 | 5 | 1 | 1 |
|   |   |   | 1 | 1 |   |   |
|   | 1 | 1 |   |   |   |   |
|   | 1 | 1 |   |   |   |   |

|   |   |   |   |   |   |   |
|---|---|---|---|---|---|---|
| 3 | 1 | 3 | 1 | 5 | 1 | 3 |
|   |   |   | 1 | 2 |   |   |
| 2 |   |   |   |   |   |   |
|   |   |   | 1 | 1 |   |   |
| 1 |   |   |   |   |   |   |
| 1 | 1 | 1 | 1 | 1 |   |   |
| 1 |   |   | 1 | 1 |   |   |
|   |   |   | 1 | 1 |   |   |
|   |   |   |   |   | 1 | 2 |
|   |   |   | 1 | 1 |   |   |
| 4 |   |   |   |   |   |   |
| 3 |   |   |   |   |   |   |
|   |   |   | 1 | 1 |   |   |
|   |   |   | 1 | 1 | 1 | 2 |
| 1 | 1 | 1 |   |   |   |   |
| 2 | 1 | 2 |   |   |   |   |
| 5 |   |   |   |   |   |   |
|   |   |   |   |   | 1 | 3 |
| 3 | 1 | 2 |   |   |   |   |
| 4 |   |   |   |   |   |   |
|   |   |   |   |   |   |   |
|   |   |   | 1 | 1 |   |   |
| 3 |   |   |   |   |   |   |
| 5 |   |   |   |   |   |   |
|   |   |   |   |   | 1 | 1 |
|   |   |   |   |   | 1 | 3 |
| 2 |   |   |   |   |   |   |
|   |   |   | 1 | 2 | 1 | 2 |
|   | 1 | 1 |   |   |   |   |
|   |   |   |   |   |   |   |
|   | 1 | 1 |   |   |   |   |
|   |   |   |   |   |   |   |
|   | 1 | 1 |   |   |   |   |
| 3 | 1 | 2 | 1 | 2 |   |   |
|   |   |   | 1 | 3 |   |   |
|   |   |   | 1 | 1 |   |   |
|   |   |   |   |   |   |   |
|   |   |   | 1 | 1 |   |   |
| 3 | 1 | 1 |   |   |   |   |
| 3 |   |   |   |   |   |   |

|   |   |   |   |   |   |   |   |
|---|---|---|---|---|---|---|---|
| 2 | 1 | 2 |   |   |   |   |   |
| 1 |   |   | 1 | 3 | 1 |   | 4 |
|   |   |   | 1 | 1 | 1 |   | 1 |
| 1 | 1 | 2 |   |   | 1 |   | 5 |
| 1 |   |   |   |   |   |   |   |
| 3 | 1 | 2 |   |   |   |   |   |
| 2 | 1 | 1 |   |   |   |   |   |
| 2 |   |   |   |   |   |   |   |
| 3 | 1 | 1 |   |   |   |   |   |
|   |   |   |   |   |   | 1 | 2 |
|   |   |   |   |   |   | 1 | 2 |
| 4 |   |   |   |   |   |   |   |
|   |   |   |   |   |   |   |   |
| 1 | 1 | 2 | 1 | 2 |   |   |   |
| 1 |   |   |   |   |   |   |   |
| 3 |   |   |   |   |   |   |   |
|   |   |   |   |   |   |   |   |
| 4 | 1 | 1 | 1 | 2 | 1 |   | 3 |
| 2 |   |   |   |   | 1 |   | 1 |
| 1 |   |   |   |   |   |   |   |
|   |   |   |   |   | 1 |   | 1 |
| 1 |   |   |   |   |   |   |   |
|   |   |   |   |   | 1 |   | 2 |
| 3 |   |   |   |   |   |   |   |
| 5 | 1 | 1 |   |   |   |   |   |
| 3 | 1 | 1 | 1 | 3 |   |   |   |
|   |   |   | 1 | 1 |   |   |   |
| 3 | 1 | 3 |   |   |   |   |   |
| 3 |   |   |   |   |   |   |   |
|   |   |   |   |   |   | 1 | 3 |
| 1 |   |   |   |   |   |   |   |
| 2 | 1 | 1 | 1 | 1 | 1 |   | 3 |
| 3 | 1 | 1 |   |   |   |   |   |
| 2 |   |   |   |   |   |   |   |
| 3 |   |   |   |   |   | 1 | 3 |
|   |   |   |   |   |   |   |   |
|   | 1 | 1 |   |   |   |   |   |
|   | 1 | 1 |   |   |   |   |   |
| 2 |   |   |   |   |   |   |   |
|   |   |   |   | 1 | 1 |   |   |
| 5 |   |   | 1 | 1 | 2 | 1 | 3 |
| 3 |   |   |   |   |   |   |   |
| 1 |   |   |   |   |   |   |   |
|   |   |   |   |   |   |   |   |
| 1 | 1 | 1 | 1 | 1 | 2 | 1 | 1 |
|   |   |   | 1 | 1 | 1 | 1 | 1 |

|   |   |   |   |   |   |   |
|---|---|---|---|---|---|---|
| 1 | 1 | 1 | 1 | 1 |   |   |
| 4 | 1 | 3 | 1 | 2 | 1 | 2 |
| 3 | 1 | 2 |   |   |   |   |
| 1 |   |   | 1 | 3 |   |   |
| 1 | 1 | 1 |   |   | 1 | 3 |
| 3 |   |   |   |   |   |   |
| 3 |   |   | 1 | 2 |   |   |
|   |   |   | 1 | 1 | 1 | 1 |
|   | 1 | 1 |   |   |   |   |
| 2 |   |   | 1 | 2 |   |   |
| 1 | 1 | 2 |   |   |   |   |
|   |   |   | 1 | 5 |   |   |
|   | 1 | 2 |   |   |   |   |
| 3 |   |   |   |   | 1 | 3 |
| 3 |   |   | 1 | 3 |   |   |
| 5 |   |   |   |   |   |   |
| 5 |   |   |   |   |   |   |
| 3 | 1 | 1 |   |   |   |   |
| 3 |   |   |   |   |   |   |
|   |   |   |   |   | 1 | 1 |
| 4 |   |   |   |   |   |   |
| 1 |   |   |   |   |   |   |
| 4 |   |   |   |   |   |   |
| 3 |   |   |   |   |   |   |
|   | 1 | 1 | 1 | 1 |   |   |
|   |   |   | 1 | 1 |   |   |
| 3 |   |   |   |   |   |   |
| 5 | 1 | 1 |   |   |   |   |
| 2 | 1 | 1 |   |   |   |   |
| 3 |   |   |   |   | 1 | 3 |
|   |   |   |   |   |   |   |
|   | 1 | 2 |   |   |   |   |
| 3 | 1 | 1 |   |   | 1 | 3 |
|   |   |   | 1 | 1 |   |   |
|   |   |   | 1 | 2 |   |   |
| 4 | 1 | 3 |   |   |   |   |
|   |   |   |   |   |   |   |
| 2 | 1 | 1 |   |   | 1 | 4 |
| 4 |   |   |   |   |   |   |
| 1 | 1 | 1 |   |   |   |   |
| 2 | 1 | 1 |   |   | 1 | 2 |

|   |   |   |   |   |   |   |   |
|---|---|---|---|---|---|---|---|
| 3 | 1 | 2 |   |   |   |   |   |
| 2 | 1 | 1 |   |   |   |   |   |
| 4 |   |   | 1 | 1 |   |   |   |
|   | 1 | 1 |   |   |   | 1 | 2 |
| 1 |   |   |   |   |   |   |   |
|   | 1 | 1 |   |   |   |   |   |
| 3 |   |   | 1 | 2 |   |   |   |
| 3 |   |   | 1 | 5 | 1 |   | 5 |
| 5 |   |   | 1 | 2 |   |   |   |
| 3 |   |   |   |   |   |   |   |
| 3 | 1 | 3 |   |   |   | 1 | 2 |
|   |   |   | 1 | 1 |   |   |   |
| 4 |   |   |   |   |   |   |   |
|   |   |   |   |   |   | 1 | 3 |
| 1 |   |   |   |   |   | 1 | 4 |
|   |   |   |   |   |   |   |   |
|   |   |   |   |   |   | 1 | 1 |
|   |   |   | 1 | 4 |   |   |   |
| 3 |   |   | 1 | 2 | 1 |   | 3 |
|   |   |   |   |   |   |   |   |
|   |   |   | 1 | 1 | 1 |   | 1 |
| 1 |   |   | 1 | 2 | 1 |   | 1 |
|   |   |   | 1 | 1 |   |   |   |
|   | 1 | 1 |   |   |   |   |   |
| 1 |   |   |   |   |   |   |   |
| 3 | 1 | 3 |   |   |   |   |   |
| 2 |   |   |   |   |   |   |   |
|   |   |   |   |   |   |   |   |
| 3 |   |   |   |   |   |   |   |
|   | 1 | 1 |   |   |   |   |   |
|   |   |   |   |   |   | 1 | 2 |
| 2 |   |   |   |   |   |   |   |
|   | 1 | 1 |   |   |   |   |   |
| 1 | 1 | 2 |   |   |   | 1 | 1 |
|   |   |   | 1 | 2 |   | 1 | 2 |
|   |   |   |   |   |   | 1 | 1 |
| 3 | 1 | 2 |   |   |   |   |   |

|   |  |   |  |   |   |  |   |   |   |
|---|--|---|--|---|---|--|---|---|---|
|   |  | 1 |  | 1 |   |  |   |   |   |
| 5 |  | 1 |  | 1 | 1 |  | 1 | 1 | 3 |
| 5 |  |   |  |   |   |  |   |   |   |
| 4 |  |   |  |   |   |  |   |   |   |
| 1 |  | 1 |  | 1 | 1 |  |   | 1 | 1 |
|   |  |   |  |   |   |  |   |   |   |
| 1 |  | 1 |  | 2 |   |  |   |   |   |
|   |  |   |  |   | 1 |  | 1 |   |   |
|   |  | 1 |  | 2 |   |  |   |   |   |
|   |  |   |  |   |   |  |   | 1 | 3 |
| 1 |  | 1 |  | 1 |   |  |   |   |   |
|   |  |   |  |   |   |  |   |   |   |
|   |  |   |  |   | 1 |  | 1 |   |   |
|   |  |   |  |   |   |  |   |   |   |
|   |  |   |  |   | 1 |  | 3 | 1 | 3 |
| 1 |  | 1 |  | 1 | 1 |  | 2 |   |   |
|   |  |   |  |   |   |  |   | 1 | 1 |
|   |  |   |  |   |   |  |   |   |   |
| 2 |  |   |  |   | 1 |  | 1 |   |   |
| 1 |  |   |  |   |   |  |   |   |   |
| 1 |  | 1 |  | 2 |   |  |   | 1 | 5 |
| 2 |  | 1 |  | 2 |   |  |   |   |   |
|   |  |   |  |   |   |  |   |   |   |
|   |  | 1 |  | 1 |   |  |   |   |   |
| 2 |  |   |  |   | 1 |  | 2 | 1 | 3 |
|   |  |   |  |   |   |  |   |   |   |
|   |  | 1 |  | 1 |   |  |   |   |   |
| 1 |  | 1 |  | 1 |   |  |   |   |   |
| 3 |  |   |  |   |   |  |   |   |   |
|   |  |   |  |   |   |  |   |   |   |
|   |  | 1 |  | 2 |   |  |   |   |   |
| 2 |  | 1 |  | 2 | 1 |  | 2 | 1 | 3 |
| 1 |  | 1 |  | 2 |   |  |   | 1 | 2 |
| 2 |  | 1 |  | 1 | 1 |  | 2 |   |   |
|   |  |   |  |   |   |  |   |   |   |
|   |  |   |  |   | 1 |  | 3 |   |   |
| 2 |  | 1 |  | 1 | 1 |  | 2 |   |   |
|   |  |   |  |   |   |  |   |   |   |
| 4 |  |   |  |   | 1 |  | 1 | 1 | 2 |
|   |  |   |  |   |   |  |   | 1 | 3 |
| 2 |  |   |  |   |   |  |   | 1 | 1 |
| 1 |  |   |  |   |   |  |   | 1 | 2 |
|   |  |   |  |   |   |  |   |   |   |
|   |  |   |  |   | 1 |  | 2 | 1 | 2 |
| 3 |  | 1 |  | 2 |   |  |   |   |   |
| 3 |  | 1 |  | 1 |   |  |   |   |   |

|   |   |   |   |   |   |   |
|---|---|---|---|---|---|---|
| 5 |   |   | 1 | 3 | 1 | 2 |
| 3 | 1 | 2 |   |   |   |   |
| 2 | 1 | 1 | 1 | 2 | 1 | 4 |
|   |   |   | 1 | 4 |   |   |
| 3 | 1 | 2 |   |   | 1 | 1 |
|   |   |   |   |   | 1 | 3 |
| 2 | 1 | 1 |   |   |   |   |
| 2 |   |   |   |   | 1 | 2 |
| 3 | 1 | 2 |   |   |   |   |
|   |   |   |   |   | 1 | 2 |
|   |   |   | 1 | 2 | 1 | 3 |
|   |   |   |   |   |   |   |
| 3 | 1 | 2 |   |   |   |   |
| 1 |   |   |   |   |   |   |
|   |   |   |   |   |   |   |
| 3 | 1 | 2 |   |   |   |   |
|   |   |   |   |   |   |   |
|   | 1 | 1 |   |   |   |   |
| 2 |   |   | 1 | 2 |   |   |
| 3 | 1 | 2 | 1 | 2 | 1 | 5 |
|   |   |   |   |   |   |   |
|   |   |   |   |   | 1 | 1 |
|   |   |   | 1 | 2 | 1 | 3 |
|   |   |   | 1 | 3 | 1 | 2 |
|   | 1 | 1 |   |   |   |   |
|   | 1 | 1 | 1 | 1 |   |   |
|   | 1 | 1 |   |   |   |   |
|   |   |   |   |   |   |   |
|   |   |   |   |   | 1 | 3 |
|   |   |   |   |   | 1 | 1 |
| 1 |   |   |   |   |   |   |
|   | 1 | 2 |   |   | 1 | 1 |
|   |   |   | 1 | 1 |   |   |
|   |   |   |   |   |   |   |
| 1 |   |   |   |   | 1 | 2 |
|   |   |   | 1 | 2 | 1 | 3 |
| 2 | 1 | 2 |   |   |   |   |
| 3 | 1 | 2 |   |   |   |   |
|   |   |   |   |   |   |   |
| 2 | 1 | 1 |   |   |   |   |
| 1 |   |   |   |   |   |   |
|   |   |   | 1 | 2 | 1 | 2 |
|   |   |   | 1 | 3 | 1 | 3 |
| 4 | 1 | 2 | 1 | 3 | 1 | 3 |
| 2 | 1 | 2 |   |   |   |   |
|   |   |   |   |   |   |   |
|   |   |   |   |   | 1 | 1 |
| 3 | 1 | 1 |   |   | 1 | 1 |



|   |   |   |   |   |   |   |   |
|---|---|---|---|---|---|---|---|
| 2 | 1 | 1 |   |   |   |   |   |
| 1 |   |   | 1 | 3 | 1 | 4 |   |
| 1 | 1 | 1 |   |   |   |   |   |
| 3 | 1 | 2 |   |   |   |   |   |
|   | 1 | 2 |   |   | 1 | 1 |   |
|   |   |   | 1 | 1 |   |   |   |
|   |   |   | 1 | 1 |   |   |   |
|   |   |   | 1 | 2 |   |   |   |
| 4 |   |   |   |   |   |   |   |
|   | 1 | 1 |   |   |   |   |   |
| 4 | 1 | 2 |   |   | 1 | 1 |   |
| 3 |   |   | 1 | 2 |   |   |   |
|   |   |   | 1 | 2 | 1 | 2 |   |
|   |   |   | 1 | 2 |   |   |   |
| 4 | 1 | 2 | 1 | 2 | 1 | 3 |   |
| 1 | 1 | 1 |   |   |   |   |   |
|   | 1 | 1 |   |   | 1 | 3 |   |
|   |   |   | 1 | 4 |   |   |   |
|   |   |   |   |   | 1 | 3 |   |
|   |   |   | 1 | 1 |   |   |   |
|   |   |   | 1 | 2 |   |   |   |
|   |   |   | 1 | 4 |   |   |   |
| 4 |   |   | 1 | 2 | 1 | 3 |   |
| 3 | 1 | 2 | 1 | 1 |   |   |   |
| 1 |   |   |   |   |   |   |   |
|   |   |   | 1 | 5 |   | 1 | 3 |
| 3 |   |   |   |   |   |   |   |
|   |   |   | 1 | 2 |   | 1 | 3 |
| 3 | 1 | 1 | 1 | 2 | 1 | 3 |   |
| 2 | 1 | 2 |   |   | 1 | 4 |   |
|   |   |   |   |   | 1 | 5 |   |
|   |   |   | 1 | 2 |   |   |   |
| 3 | 1 | 1 |   |   |   |   |   |
| 1 |   |   | 1 | 3 | 1 | 3 |   |
|   |   |   | 1 | 1 |   |   |   |
|   |   |   | 1 | 2 | 1 | 3 |   |
| 1 |   |   |   |   | 1 | 1 |   |

|   |   |   |   |    |   |  |   |
|---|---|---|---|----|---|--|---|
|   | 1 | 2 |   |    |   |  |   |
| 4 |   |   |   |    |   |  |   |
| 3 | 1 | 2 |   |    |   |  |   |
|   |   |   | 1 | 2  |   |  |   |
| 2 |   |   | 1 | 5  | 1 |  | 2 |
|   |   |   |   |    |   |  |   |
| 3 | 1 | 2 |   |    |   |  |   |
| 3 |   |   | 1 | 3  |   |  |   |
| 3 | 1 | 2 |   |    |   |  |   |
| 2 |   |   |   |    |   |  |   |
| 1 | 1 | 1 |   |    |   |  |   |
|   |   |   | 1 | 3  |   |  |   |
| 3 |   |   |   |    |   |  |   |
| 1 |   |   |   |    |   |  |   |
|   |   |   |   |    |   |  |   |
| 3 |   |   | 1 | 2  |   |  |   |
|   |   |   | 1 | 1  |   |  |   |
| 2 |   |   |   |    | 1 |  | 4 |
|   | 1 | 2 | 1 | 4  | 1 |  | 2 |
| 1 | 1 | 2 |   |    |   |  |   |
|   |   |   | 1 | 1  |   |  |   |
|   |   |   |   |    | 1 |  | 5 |
| 4 |   |   | 1 | 1  |   |  |   |
| 4 |   |   | 1 | 3  |   |  |   |
| 3 |   |   | 1 | 3  |   |  |   |
|   |   |   | 1 | 31 | 1 |  | 1 |
|   |   |   |   |    | 1 |  | 3 |
| 4 | 1 | 2 |   |    |   |  |   |
|   |   |   |   |    | 1 |  | 3 |
| 1 |   |   |   |    |   |  |   |
|   |   |   |   |    |   |  |   |
|   | 1 | 2 |   |    |   |  |   |
| 4 | 1 | 2 | 1 | 2  | 1 |  | 3 |
|   |   |   |   |    |   |  |   |
|   |   |   | 1 | 3  |   |  |   |
| 2 | 1 | 3 |   |    |   |  |   |
| 4 | 1 | 2 | 1 | 1  |   |  |   |
| 2 | 1 | 1 |   |    | 1 |  | 1 |
|   |   |   |   |    |   |  |   |
| 3 | 1 | 1 |   |    |   |  |   |
| 5 | 1 | 2 |   |    | 1 |  | 3 |
|   |   |   |   |    |   |  |   |
| 3 |   |   |   |    |   |  |   |
| 2 |   |   |   |    | 1 |  | 3 |
| 5 |   |   |   |    |   |  |   |

|   |   |   |   |   |   |   |
|---|---|---|---|---|---|---|
| 3 | 1 | 2 |   |   | 1 | 3 |
| 1 |   |   |   |   |   |   |
| 3 |   |   |   |   |   |   |
| 4 |   |   |   |   |   |   |
|   |   |   |   |   | 1 | 1 |
| 3 |   |   |   |   |   |   |
| 2 | 1 | 1 |   |   |   |   |
|   | 1 | 3 |   |   | 1 | 3 |
| 2 |   |   | 1 | 4 | 1 | 3 |
| 2 | 1 | 1 | 1 | 2 | 1 | 2 |
|   |   |   |   |   |   |   |
| 5 | 1 | 3 | 1 | 2 | 1 | 3 |
|   | 1 | 1 |   |   |   |   |
| 2 | 1 | 2 |   |   |   |   |
|   |   |   | 1 | 2 |   |   |
|   |   |   | 1 | 2 |   |   |
|   |   |   | 1 | 1 | 1 | 3 |
| 3 | 1 | 2 |   |   |   |   |
|   |   |   |   |   |   |   |
|   | 1 | 2 | 1 | 1 |   |   |
|   |   |   |   |   | 1 | 2 |
|   | 1 | 2 |   |   |   |   |
| 2 | 1 | 1 |   |   |   |   |
| 4 | 1 | 2 |   |   |   |   |
| 5 | 1 | 1 |   |   |   |   |
| 1 | 1 | 2 |   |   | 1 | 1 |
| 3 |   |   |   |   | 1 | 3 |
|   |   |   |   |   |   |   |
|   | 1 | 1 |   |   |   |   |
|   |   |   | 1 | 2 | 1 | 5 |
| 2 | 1 | 1 |   |   |   |   |
|   |   |   | 1 | 2 | 1 | 3 |
|   |   |   |   |   |   |   |
| 2 | 1 | 1 |   |   | 1 | 3 |
| 2 |   |   |   |   |   |   |
|   | 1 | 1 |   |   |   |   |
|   |   |   |   |   | 1 | 2 |
|   |   |   | 1 | 2 | 1 | 3 |
|   |   |   | 1 | 1 | 1 | 1 |
|   |   |   |   |   | 1 | 1 |
| 4 |   |   |   |   |   |   |
|   |   |   |   |   |   |   |
| 4 | 1 | 2 |   |   | 1 | 1 |
|   |   |   | 1 | 2 | 1 | 3 |
| 3 | 1 | 3 | 1 | 4 | 1 | 3 |

|   |   |   |   |   |   |   |   |
|---|---|---|---|---|---|---|---|
| 2 | 1 | 1 | 1 | 2 |   |   |   |
| 1 | 1 | 2 |   |   |   |   |   |
|   | 1 | 2 |   |   |   |   |   |
|   |   |   | 1 | 2 | 1 |   | 3 |
| 3 |   |   |   |   |   |   |   |
|   |   |   | 1 | 3 |   |   |   |
|   |   |   | 1 | 2 |   |   |   |
|   |   |   | 1 | 3 | 1 |   | 1 |
| 4 |   |   |   |   | 1 |   | 1 |
| 5 |   |   |   |   |   |   |   |
| 4 |   |   |   |   |   |   |   |
|   |   |   |   |   |   |   |   |
| 2 |   |   |   |   | 1 |   | 1 |
| 3 |   |   |   |   | 1 |   | 3 |
|   |   |   |   |   | 1 |   | 1 |
| 1 |   |   |   |   | 1 |   | 3 |
|   | 1 | 2 |   |   |   |   |   |
| 3 | 1 | 2 |   |   |   |   |   |
| 4 | 1 | 1 | 1 | 3 |   |   |   |
|   |   |   |   |   | 1 |   | 2 |
| 1 | 1 | 2 |   |   |   |   |   |
|   | 1 | 2 | 1 | 1 |   |   |   |
| 1 |   |   |   |   |   |   |   |
| 3 |   |   | 1 | 2 |   |   |   |
| 4 |   |   |   |   |   |   |   |
| 2 | 1 | 1 |   |   |   | 1 | 2 |
|   |   |   |   |   |   | 1 | 3 |
|   |   |   | 1 | 2 |   |   |   |
|   |   |   | 1 | 2 |   |   |   |
| 1 | 1 | 2 |   |   |   | 1 | 3 |
|   |   |   |   |   |   |   |   |
| 2 |   |   |   |   |   |   |   |
|   |   |   | 1 | 4 | 1 |   | 3 |
| 2 |   |   |   |   | 1 |   | 1 |
|   |   |   |   |   | 1 |   | 3 |
|   |   |   | 1 | 2 |   |   |   |
| 3 |   |   | 1 | 2 |   |   |   |
|   |   |   | 1 | 1 |   |   |   |
| 4 |   |   |   |   |   |   |   |
|   |   |   | 1 | 1 | 1 |   | 4 |
|   |   |   |   |   | 1 |   | 2 |
| 3 |   |   |   |   |   |   |   |
| 2 | 1 | 2 |   |   |   |   |   |
| 3 |   |   |   |   |   |   |   |
|   | 1 | 1 |   |   | 1 |   | 3 |

|   |   |   |   |   |   |   |
|---|---|---|---|---|---|---|
| 3 | 1 | 2 | 1 | 2 |   |   |
| 1 | 1 | 2 |   |   | 1 | 2 |
|   | 1 | 1 |   |   | 1 | 2 |
|   |   |   |   |   | 1 | 1 |
| 5 | 1 | 2 |   |   |   |   |
|   |   |   | 1 | 2 | 1 | 3 |
|   |   |   | 1 | 5 | 1 | 3 |
| 2 |   |   |   |   |   |   |
|   | 1 | 1 |   |   |   |   |
| 2 |   |   |   |   |   |   |
| 3 |   |   |   |   |   |   |
| 5 |   |   |   |   |   |   |
| 1 |   |   | 1 | 2 |   |   |
|   |   |   |   |   | 1 | 2 |
|   |   |   |   |   |   |   |
|   |   |   |   |   | 1 | 3 |
|   |   |   |   |   | 1 | 3 |
| 2 | 1 | 2 |   |   |   |   |
| 4 |   |   | 1 | 2 | 1 | 3 |
|   |   |   |   |   |   |   |
| 4 |   |   | 1 | 2 |   |   |
| 4 | 1 | 1 |   |   | 1 | 3 |
|   |   |   | 1 | 1 |   |   |
|   |   |   |   |   |   |   |
| 5 | 1 | 2 |   |   | 1 | 5 |
| 2 | 1 | 2 | 1 | 2 | 1 | 5 |
| 2 |   |   |   |   |   |   |
| 2 |   |   |   |   | 1 | 4 |
|   |   |   | 1 | 4 |   |   |
| 5 |   |   | 1 | 3 | 1 | 3 |
| 3 | 1 | 2 | 1 | 2 | 1 | 1 |
|   |   |   | 1 | 3 |   |   |
| 5 |   |   | 1 | 2 | 1 | 3 |
| 4 | 1 | 2 | 1 | 2 |   |   |
| 2 | 1 | 3 |   |   |   |   |
| 1 | 1 | 1 | 1 | 2 | 1 | 3 |
| 1 | 1 | 1 |   |   |   |   |
| 3 |   |   |   |   |   |   |
| 3 |   |   |   |   | 1 | 2 |
|   |   |   |   |   |   |   |
| 1 |   |   |   |   |   |   |
|   |   |   | 1 | 2 | 1 | 1 |
|   |   |   |   |   | 1 | 3 |

|   |   |   |   |   |   |   |   |
|---|---|---|---|---|---|---|---|
| 2 | 1 | 2 |   |   |   |   |   |
| 2 |   |   |   |   |   |   |   |
| 2 |   |   | 1 | 2 | 1 | 3 |   |
|   |   |   | 1 | 2 |   |   |   |
| 2 | 1 | 1 |   |   |   |   |   |
| 2 | 1 | 1 |   |   | 1 | 5 |   |
|   |   |   |   |   |   |   |   |
| 2 |   |   | 1 | 5 | 1 | 1 |   |
|   |   |   |   |   | 1 |   | 4 |
|   |   |   | 1 | 1 |   |   |   |
| 2 |   |   |   |   |   |   |   |
|   | 1 | 3 |   |   |   |   |   |
| 1 |   |   |   |   | 1 | 3 |   |
|   |   |   | 1 | 3 | 1 | 2 |   |
| 2 |   |   | 1 | 5 |   |   |   |
| 3 | 1 | 1 |   |   |   |   |   |
| 2 |   |   | 1 | 2 | 1 | 3 |   |
|   |   |   |   |   | 1 | 3 |   |
| 1 |   |   |   |   |   |   |   |
| 2 | 1 | 3 | 1 | 2 |   |   |   |
|   |   |   |   |   | 1 | 3 |   |
|   | 1 | 1 |   |   |   |   |   |
|   |   |   |   |   |   |   |   |
| 3 |   |   |   |   | 1 | 3 |   |
|   |   |   | 1 | 2 | 1 | 2 |   |
|   |   |   |   |   | 1 | 3 |   |
|   |   |   |   |   | 1 | 3 |   |
|   |   |   |   |   | 1 | 2 |   |
|   |   |   | 1 | 1 |   |   |   |
| 2 | 1 | 3 |   |   | 1 | 2 |   |
|   | 1 | 1 |   |   | 1 | 3 |   |
| 3 |   |   |   |   |   |   |   |
| 1 | 1 | 2 |   |   |   |   |   |
|   |   |   |   |   |   |   |   |
| 2 |   |   | 1 | 2 | 1 | 4 |   |
| 2 |   |   |   |   | 1 | 3 |   |
|   | 1 | 2 | 1 | 2 | 1 | 3 |   |
| 1 | 1 | 1 |   |   | 1 | 1 |   |
| 1 | 1 | 2 |   |   |   |   |   |
| 2 |   |   | 1 | 2 | 1 | 2 |   |
| 1 | 1 | 1 |   |   |   |   |   |
| 1 | 1 | 2 |   |   | 1 | 3 |   |
|   |   |   |   |   | 1 | 1 |   |

|   |   |   |   |   |   |   |
|---|---|---|---|---|---|---|
|   |   |   | 1 | 1 |   |   |
| 2 | 1 | 1 | 1 | 3 | 1 | 2 |
| 2 |   |   | 1 | 2 | 1 | 3 |
| 1 | 1 | 2 |   |   |   |   |
|   |   |   |   |   | 1 | 4 |
|   |   |   |   |   | 1 | 3 |
|   |   |   |   |   |   |   |
|   |   |   |   |   | 1 | 3 |
|   |   |   | 1 | 1 |   |   |
| 3 |   |   | 1 | 2 | 1 | 3 |
|   |   |   |   |   |   |   |
| 2 |   |   |   |   |   |   |
| 2 |   |   | 1 | 5 |   |   |
|   | 1 | 1 | 1 | 2 |   |   |
| 1 |   |   |   |   |   |   |
| 1 |   |   | 1 | 1 |   |   |
|   |   |   | 1 |   |   |   |
| 1 |   |   |   |   | 1 | 1 |
|   |   |   |   |   |   |   |
| 3 |   |   |   |   |   |   |
|   |   |   | 1 | 2 | 1 | 2 |
| 3 |   |   | 1 | 3 |   |   |
| 2 |   |   |   |   |   |   |
|   |   |   |   |   |   |   |
|   |   |   | 1 | 2 | 1 | 3 |
|   |   |   |   |   | 1 | 4 |
|   |   |   |   |   |   |   |
|   |   |   | 1 | 2 | 1 | 5 |
|   | 1 | 2 | 1 | 5 |   |   |
|   |   |   |   |   |   |   |
|   | 1 | 1 | 1 | 2 | 1 | 4 |
| 1 | 1 | 1 | 1 | 2 |   |   |
|   |   |   | 1 | 2 | 1 | 2 |
|   |   |   | 1 | 2 | 1 | 2 |
|   |   |   |   |   |   |   |
| 2 | 1 | 2 | 1 | 2 | 1 | 3 |
| 3 | 1 | 3 |   |   | 1 | 1 |
|   |   |   |   |   |   |   |
|   | 1 | 1 |   |   |   |   |
| 2 | 1 | 1 | 1 | 3 |   |   |
|   |   |   |   |   |   |   |
|   |   |   |   |   |   |   |
| 6 | 1 | 1 |   |   | 1 | 3 |
| 4 |   |   |   |   |   |   |
|   |   |   | 1 | 2 | 1 | 3 |

|   |   |   |   |   |   |   |   |
|---|---|---|---|---|---|---|---|
| 2 | 1 | 2 |   |   |   |   |   |
| 3 |   |   | 1 | 2 | 1 | 3 |   |
|   |   |   | 1 | 3 | 1 | 3 |   |
| 2 |   |   |   |   |   |   |   |
| 3 |   |   |   |   | 1 | 1 |   |
|   |   |   | 1 | 1 |   |   |   |
| 1 |   |   |   |   | 1 | 3 |   |
|   |   |   |   |   | 1 | 3 |   |
| 1 |   |   |   |   |   |   |   |
|   |   |   | 1 | 2 |   |   |   |
| 1 | 1 | 2 |   |   | 1 | 3 |   |
| 1 |   |   |   |   |   |   |   |
| 1 |   |   | 1 | 1 |   |   |   |
|   |   |   |   |   |   | 1 | 3 |
|   | 1 | 1 |   |   |   |   |   |
| 2 |   |   |   |   |   |   |   |
| 2 | 1 | 2 |   |   | 1 | 3 |   |
| 3 |   |   | 1 | 4 |   |   |   |
|   |   |   |   |   | 1 | 3 |   |
| 1 |   |   |   |   |   |   |   |
| 2 | 1 | 2 | 1 | 3 |   |   |   |
| 1 |   |   | 1 | 2 | 1 | 1 |   |
|   |   |   |   |   | 1 | 5 |   |
|   |   |   |   |   |   |   |   |
|   |   |   | 1 | 2 |   |   |   |
|   |   |   |   |   | 1 | 3 |   |
| 2 |   |   |   |   |   |   |   |
|   |   |   |   |   | 1 | 2 |   |
| 2 |   |   | 1 | 2 | 1 | 2 |   |
|   | 1 | 1 |   |   |   |   |   |
| 3 | 1 | 1 |   |   |   |   |   |
|   |   |   |   |   | 1 | 3 |   |
| 1 |   |   | 1 | 2 |   |   |   |
| 3 |   |   |   |   | 1 | 3 |   |
|   |   |   | 1 | 5 | 1 | 3 |   |
| 5 |   |   |   |   |   |   |   |
| 3 | 1 | 1 |   |   |   |   |   |
| 4 | 1 | 2 |   |   | 1 | 2 |   |
|   |   |   |   |   |   |   |   |
| 4 |   |   |   |   |   |   |   |



|   |   |   |   |   |   |   |
|---|---|---|---|---|---|---|
| 4 |   |   | 1 | 2 |   |   |
|   |   |   | 1 | 2 |   |   |
| 1 |   |   |   |   |   |   |
| 5 | 1 | 2 |   |   | 1 | 1 |
|   |   |   |   |   |   |   |
| 5 | 1 | 1 |   |   |   |   |
| 1 |   |   |   |   |   |   |
| 1 |   |   |   |   |   |   |
|   | 1 | 1 |   |   | 1 | 3 |
|   |   |   | 1 | 2 |   |   |
|   | 1 | 2 |   |   | 1 | 3 |
|   |   |   |   |   |   |   |
| 1 |   |   | 1 | 2 | 1 | 3 |
| 1 |   |   |   |   | 1 | 4 |
|   |   |   |   |   |   |   |
|   |   |   |   |   | 1 | 2 |
|   |   |   |   |   |   |   |
| 4 |   |   | 1 | 1 |   |   |
|   |   |   |   |   |   |   |
| 3 | 1 | 1 |   |   | 1 | 3 |
| 1 |   |   |   |   |   |   |
|   |   |   | 1 | 1 | 1 | 2 |
|   |   |   |   |   |   |   |
| 1 | 1 | 1 |   |   |   |   |
| 1 |   |   | 1 | 2 | 1 | 3 |
|   |   |   |   |   |   |   |
| 5 |   |   |   |   |   |   |
|   | 1 | 1 |   |   | 1 | 2 |
| 5 |   |   |   |   |   |   |
| 1 | 1 | 1 |   |   |   |   |
|   |   |   |   |   |   |   |
| 3 |   |   | 1 | 1 |   |   |
|   |   |   |   |   |   |   |
|   |   |   | 1 | 2 | 1 | 3 |
|   |   |   |   |   |   |   |
| 3 |   |   |   |   |   |   |
| 3 |   |   |   |   |   |   |
| 1 | 1 | 1 |   |   |   |   |
| 3 | 1 | 3 |   |   |   |   |
| 3 | 1 | 2 |   |   |   |   |
|   |   |   | 1 | 2 |   |   |
|   |   |   |   |   |   |   |
| 1 |   |   |   |   |   |   |
| 2 |   |   |   |   |   |   |
|   |   |   |   |   | 1 | 1 |

|   |   |   |   |  |   |   |   |
|---|---|---|---|--|---|---|---|
| 4 | 1 | 2 |   |  |   |   |   |
| 2 | 1 | 4 |   |  |   | 1 | 2 |
| 2 | 1 | 1 |   |  |   | 1 | 1 |
| 4 |   |   | 1 |  | 2 | 1 | 3 |
| 2 | 1 | 2 |   |  |   |   |   |
| 1 | 1 | 2 |   |  |   |   |   |
|   |   |   | 1 |  | 1 |   |   |
| 2 | 1 | 1 |   |  |   |   |   |
| 1 | 1 | 2 |   |  |   |   |   |
| 1 | 1 | 2 | 1 |  | 2 | 1 | 3 |
| 1 |   |   |   |  |   |   |   |
|   |   |   |   |  |   | 1 | 4 |
| 1 | 1 | 2 |   |  |   |   |   |
| 2 | 1 | 1 |   |  |   |   |   |
| 3 |   |   |   |  |   |   |   |
|   |   |   |   |  |   |   |   |
| 3 | 1 | 2 |   |  |   |   |   |
|   |   |   |   |  |   | 1 | 3 |
|   |   |   |   |  |   | 1 | 1 |
| 1 |   |   |   |  |   |   |   |
|   |   |   | 1 |  | 1 |   |   |
|   |   |   |   |  |   | 1 | 1 |
| 4 | 1 | 2 |   |  |   | 1 | 3 |
|   |   |   | 1 |  | 2 |   |   |
|   |   |   |   |  |   |   |   |
| 1 |   |   |   |  |   | 1 | 1 |
| 3 |   |   |   |  |   | 1 | 2 |
| 4 |   |   |   |  |   |   |   |
|   |   |   |   |  |   | 1 | 3 |
| 2 | 1 | 1 |   |  |   |   |   |
| 2 | 1 | 1 |   |  |   |   |   |
|   |   |   |   |  |   | 1 | 3 |
| 1 | 1 | 1 |   |  |   |   |   |
| 2 | 1 | 2 |   |  |   |   |   |
|   |   |   |   |  |   |   |   |
|   |   |   | 1 |  | 3 | 1 | 3 |
|   |   |   | 1 |  | 2 |   |   |
|   |   |   |   |  |   |   |   |
| 2 |   |   |   |  |   |   |   |
| 1 |   |   |   |  |   |   |   |
| 1 |   |   |   |  |   |   |   |
|   |   |   | 1 |  | 1 |   |   |

|   |   |   |   |   |   |   |
|---|---|---|---|---|---|---|
| 4 | 1 | 2 |   |   | 1 | 2 |
| 4 |   |   |   |   |   |   |
| 4 | 1 | 1 |   |   |   |   |
| 1 |   |   |   |   |   |   |
| 2 |   |   |   |   |   |   |
|   | 1 | 1 |   |   | 1 | 3 |
|   |   |   | 1 | 1 |   |   |
|   |   |   |   |   | 1 | 3 |
| 2 |   |   | 1 | 3 |   |   |
|   | 1 | 2 |   |   |   |   |
|   | 1 | 1 |   |   |   |   |
| 1 | 1 | 1 |   |   |   |   |
|   |   |   |   |   | 1 | 2 |
|   |   |   | 1 | 1 | 1 | 1 |
|   |   |   | 1 | 1 |   |   |
| 5 | 1 | 2 |   |   | 1 | 2 |
| 2 | 1 | 1 | 1 | 4 |   |   |
|   |   |   | 1 | 4 |   |   |
|   |   |   | 1 | 1 | 1 | 1 |
|   |   |   |   |   |   |   |
| 3 | 1 | 2 |   |   | 1 | 3 |
|   |   |   |   |   |   |   |
|   |   |   |   |   | 1 | 1 |
| 1 |   |   |   |   |   |   |
| 1 |   |   |   |   |   |   |
| 2 |   |   |   |   |   |   |
|   |   |   |   |   | 1 | 3 |
| 1 | 1 | 2 |   |   | 1 | 2 |
|   |   |   |   |   | 1 | 1 |
| 3 |   |   |   |   | 1 | 2 |
| 3 | 1 | 1 | 1 | 1 |   |   |
|   |   |   |   |   |   |   |
|   |   |   | 1 | 1 |   |   |
| 1 |   |   |   |   |   |   |
|   |   |   |   |   |   |   |
| 1 |   |   |   |   | 1 | 2 |



|   |   |   |   |   |   |   |
|---|---|---|---|---|---|---|
|   | 1 | 1 | 1 | 2 |   |   |
| 4 | 1 | 2 |   |   |   |   |
|   |   |   | 1 | 1 | 1 | 1 |
|   |   |   | 1 | 1 | 1 | 2 |
| 5 | 1 | 2 |   |   | 1 | 2 |
|   |   |   |   |   | 1 | 1 |
| 1 |   |   |   |   |   |   |
|   |   |   | 1 | 2 |   |   |
| 3 |   |   | 1 | 2 | 1 | 2 |
|   |   |   | 1 | 1 |   |   |
| 1 |   |   |   |   |   |   |
| 2 |   |   |   |   | 1 | 1 |
| 3 | 1 | 1 |   |   |   |   |
|   |   |   | 1 | 2 | 1 | 3 |
|   | 1 | 1 |   |   |   |   |
|   | 1 | 1 |   |   | 1 | 2 |
| 1 | 1 | 1 |   |   | 1 | 1 |
| 5 | 1 | 2 | 1 | 2 |   |   |
|   |   |   |   |   | 1 | 2 |
|   | 1 | 2 | 1 | 2 |   |   |
|   | 1 | 1 | 1 | 2 | 1 | 3 |
|   |   |   | 1 | 2 | 1 | 2 |
| 2 | 1 | 2 |   |   |   |   |
|   |   |   |   |   | 1 | 3 |
|   |   |   |   |   |   |   |
| 2 | 1 | 1 |   |   |   |   |
| 3 | 1 | 2 |   |   |   |   |
| 1 |   |   |   |   |   |   |
| 2 | 1 | 2 |   |   |   |   |
|   |   |   | 1 | 1 | 1 | 1 |
|   |   |   | 1 | 3 |   |   |
|   |   |   |   |   | 1 | 5 |
|   |   |   |   |   | 1 | 3 |
| 3 | 1 | 3 |   |   |   |   |
|   |   |   |   |   |   |   |
| 1 | 1 | 2 |   |   | 1 | 1 |
| 3 |   |   |   |   |   |   |
|   | 1 | 2 |   |   | 1 | 2 |
| 2 | 1 | 1 | 1 | 1 |   |   |
| 4 |   |   |   |   |   |   |
| 3 | 1 | 4 | 1 | 2 | 1 | 2 |
|   |   |   |   |   |   |   |
|   | 1 | 1 | 1 | 2 | 1 | 3 |

|   |   |   |   |   |   |   |   |
|---|---|---|---|---|---|---|---|
|   |   |   |   |   |   | 1 | 3 |
| 3 |   |   |   |   |   |   |   |
| 2 |   |   |   |   |   | 1 | 3 |
| 3 | 1 | 2 |   |   |   |   |   |
| 2 |   |   |   |   |   |   |   |
| 3 | 1 | 1 |   |   |   |   |   |
| 3 |   |   |   |   |   |   |   |
| 3 | 1 | 1 |   |   |   | 1 | 2 |
| 4 | 1 | 1 | 1 | 1 | 1 |   |   |
|   |   |   |   | 1 | 5 | 1 | 3 |
|   |   |   |   |   |   |   |   |
|   |   |   |   | 1 | 2 |   |   |
| 4 |   |   |   |   |   |   |   |
| 3 |   |   | 1 | 1 | 1 |   | 3 |
| 3 | 1 | 2 |   |   |   | 1 | 1 |
| 2 |   |   |   |   |   | 1 | 1 |
|   |   |   |   |   |   |   |   |
|   |   |   |   |   |   | 1 | 3 |
| 1 | 1 | 1 |   |   |   |   |   |
| 2 |   |   | 1 | 3 |   |   |   |
|   |   |   | 1 | 2 |   | 1 | 1 |
|   |   |   |   |   |   |   |   |
|   |   |   | 1 | 2 |   | 1 | 3 |
|   |   |   | 1 | 1 |   | 1 | 1 |
|   |   |   |   |   |   | 1 | 3 |
| 1 | 1 | 1 |   |   |   |   |   |
|   |   |   |   |   |   | 1 | 1 |
| 1 | 1 | 2 | 1 | 3 |   |   |   |
|   |   |   |   |   |   |   |   |
| 1 |   |   |   |   |   |   |   |
| 1 | 1 | 1 |   |   |   |   |   |
| 3 | 1 | 2 |   |   |   |   |   |
|   |   |   | 1 | 4 |   | 1 | 2 |
|   |   |   |   |   |   |   |   |
| 2 |   |   | 1 | 2 |   | 1 | 2 |
| 5 |   |   |   |   |   | 1 | 3 |
|   |   |   |   |   |   | 1 | 3 |
| 2 | 1 | 1 | 1 | 2 |   |   |   |
| 1 |   |   | 1 | 2 |   | 1 | 3 |
|   |   |   | 1 | 1 |   |   |   |
| 1 | 1 | 1 | 1 | 3 |   | 1 | 2 |

|   |   |   |   |   |   |   |   |
|---|---|---|---|---|---|---|---|
|   | 1 | 2 |   | 1 | 1 |   |   |
|   | 1 | 1 |   |   |   |   |   |
| 1 | 1 | 2 |   |   |   |   |   |
|   |   |   |   |   |   | 1 | 1 |
| 5 |   |   |   |   |   | 1 | 3 |
| 1 |   |   |   |   |   |   |   |
| 1 | 1 | 2 |   |   |   |   |   |
| 5 |   |   | 1 | 2 | 1 |   | 1 |
|   |   |   | 1 | 2 |   |   |   |
|   |   |   |   |   |   |   |   |
|   |   |   | 1 | 2 | 1 |   | 3 |
|   |   |   |   |   | 1 |   | 2 |
| 1 |   |   |   |   | 1 |   | 3 |
| 1 |   |   |   |   |   |   |   |
| 4 | 1 | 1 |   |   |   |   |   |
| 1 |   |   |   |   |   |   |   |
| 4 |   |   |   |   |   |   |   |
|   |   |   |   |   |   | 1 | 1 |
| 1 |   |   | 1 | 2 | 1 |   | 5 |
| 2 | 1 | 2 |   |   |   |   |   |
| 1 | 1 | 1 |   |   |   |   |   |
|   |   |   | 1 | 2 |   |   |   |
| 2 |   |   |   |   |   |   |   |
| 1 |   |   |   |   |   | 1 | 1 |
| 3 | 1 | 1 |   |   |   |   |   |
|   |   |   |   |   |   | 1 | 3 |
|   |   |   | 1 | 1 |   |   |   |
| 1 | 1 | 3 |   |   |   |   |   |
|   |   |   | 1 | 2 |   |   |   |
|   |   |   | 1 | 2 |   |   |   |
| 2 | 1 | 1 |   |   |   |   |   |
| 2 |   |   | 1 | 2 |   |   |   |
|   |   |   | 1 | 1 |   |   |   |
| 2 |   |   | 1 | 2 |   |   |   |
|   |   |   | 1 | 2 | 1 |   | 1 |
|   |   |   | 1 | 2 | 1 |   | 1 |
| 2 |   |   | 1 | 2 |   |   |   |
| 1 |   |   | 1 | 1 | 1 |   | 3 |
|   | 1 | 1 |   |   |   |   |   |
|   |   |   | 1 | 1 |   |   |   |
| 3 | 1 | 1 | 1 | 2 |   |   |   |
|   |   |   |   |   |   | 1 | 3 |

|   |   |   |   |   |   |   |
|---|---|---|---|---|---|---|
|   | 1 | 1 | 1 | 2 | 1 | 1 |
|   |   |   | 1 | 3 | 1 | 1 |
| 5 |   |   | 1 | 2 | 1 | 3 |
|   |   |   |   |   | 1 | 1 |
| 4 | 1 | 1 |   |   | 1 | 2 |
|   |   |   |   |   | 1 | 1 |
| 2 |   |   | 1 | 2 |   |   |
|   |   |   | 1 | 2 |   |   |
| 2 | 1 | 1 |   |   | 1 | 1 |
| 2 | 1 | 1 | 1 | 2 | 1 | 1 |
| 1 | 1 | 2 |   |   |   |   |
|   |   |   | 1 | 2 |   |   |
| 1 |   |   | 1 | 2 | 1 | 4 |
| 1 |   |   |   |   |   |   |
|   |   |   | 1 | 2 | 1 | 2 |
| 3 | 1 | 2 |   |   |   |   |
|   |   |   |   |   |   |   |
| 2 |   |   |   |   |   |   |
| 2 | 1 | 2 | 1 | 4 |   |   |
| 4 | 1 | 3 |   |   |   |   |
| 1 |   |   |   |   |   |   |
| 3 |   |   |   |   |   |   |
| 5 | 1 | 4 |   |   |   |   |
| 3 |   |   | 1 | 4 |   |   |
| 2 |   |   |   |   |   |   |
| 2 |   |   | 1 | 2 | 1 | 3 |
| 1 |   |   |   |   |   |   |



AIS\_Abdomen AIS\_Score\_Abdomen AIS\_Upper\_Extremity AIS\_Score\_Upper\_Extremity AIS\_Lower\_Extremity

1 1  
1 1

1

1

2

1 1  
1 1  
1 1

1  
1  
1

1 2

1

1 1

1 1  
1 2

1 2

1

1

1

1

1

1

1

1

1

5

1

2

1

1

1

1

1

2

1

2

1

1

2

1

1

1

1

1

1

1

1

1

2

1

1

1

1

1

2

1

1

1

1

1

|   |   |   |  |   |  |   |
|---|---|---|--|---|--|---|
|   |   | 1 |  | 1 |  | 1 |
|   |   | 1 |  | 1 |  | 1 |
|   |   | 1 |  | 2 |  |   |
|   |   | 1 |  | 1 |  |   |
|   |   | 1 |  | 1 |  | 1 |
|   |   | 1 |  | 1 |  |   |
| 1 | 3 | 1 |  | 2 |  | 1 |
|   |   |   |  |   |  | 1 |
|   |   |   |  |   |  | 1 |
| 1 | 1 | 1 |  | 1 |  | 1 |
|   |   | 1 |  | 2 |  | 1 |
|   |   | 1 |  | 1 |  | 1 |
|   |   | 1 |  | 1 |  |   |
| 1 | 3 | 1 |  | 2 |  | 1 |
|   |   |   |  |   |  | 1 |
|   |   | 1 |  | 1 |  |   |
|   |   | 1 |  | 1 |  | 1 |
|   |   | 1 |  | 1 |  |   |
|   |   |   |  |   |  | 1 |
|   |   |   |  |   |  | 1 |

|   |   |  |   |  |   |   |                  |
|---|---|--|---|--|---|---|------------------|
|   |   |  | 1 |  |   | 1 | 1                |
|   |   |  | 1 |  |   | 1 | 1                |
|   |   |  | 1 |  |   | 1 |                  |
| 1 | 5 |  | 1 |  | 2 |   | 1<br>1<br>1<br>1 |
|   |   |  |   |  |   |   |                  |
| 1 | 2 |  | 1 |  | 2 |   | 1                |
|   |   |  | 1 |  | 1 |   | 1                |
|   |   |  |   |  |   |   |                  |
|   |   |  | 1 |  | 2 |   | 1                |
|   |   |  | 1 |  | 2 |   |                  |
| 1 | 2 |  | 1 |  | 2 |   | 1<br>1           |
|   |   |  | 1 |  | 1 |   |                  |
|   |   |  |   |  |   |   | 1                |
|   |   |  |   |  |   |   | 1                |
|   |   |  | 1 |  | 1 |   | 1                |
|   |   |  | 1 |  | 1 |   | 1                |
|   |   |  | 1 |  | 1 |   | 1                |
|   |   |  | 1 |  | 2 |   |                  |
|   |   |  | 1 |  | 2 |   |                  |
|   |   |  | 1 |  | 1 |   | 1                |
|   |   |  | 1 |  | 1 |   | 1                |
| 1 | 1 |  |   |  |   |   |                  |
|   |   |  |   |  |   |   |                  |
|   |   |  | 1 |  | 2 |   | 1                |
|   |   |  | 1 |  | 1 |   | 1                |

|   |   |   |   |   |
|---|---|---|---|---|
|   |   |   |   | 1 |
| 1 | 2 | 1 | 2 | 1 |
|   |   | 1 | 2 | 1 |
| 1 | 1 |   |   | 1 |
| 1 | 4 | 1 | 1 | 1 |
|   |   | 1 | 1 | 1 |
| 1 | 1 | 1 | 2 | 1 |
|   |   | 1 | 1 | 1 |
|   |   |   |   | 1 |
| 1 | 1 | 1 | 1 | 1 |
|   |   |   |   | 1 |
|   |   | 1 | 3 | 1 |
|   |   | 1 | 2 | 1 |
|   |   |   |   | 1 |
|   |   | 1 | 1 | 1 |
|   |   |   |   | 1 |
|   |   | 1 | 1 | 1 |
|   |   | 1 | 2 | 1 |
|   |   | 1 | 1 | 1 |
|   |   |   |   | 1 |
|   |   | 1 | 1 | 1 |
|   |   | 1 | 2 | 1 |
|   |   | 1 | 1 | 1 |
|   |   |   |   | 1 |
|   |   | 1 | 2 | 1 |



|   |   |  |   |   |   |
|---|---|--|---|---|---|
|   |   |  | 1 | 2 | 1 |
| 1 | 3 |  |   |   | 1 |
|   |   |  |   |   |   |
| 1 | 1 |  |   |   |   |
|   |   |  | 1 | 2 | 1 |
|   |   |  | 1 | 1 | 1 |
| 1 | 2 |  |   |   |   |
| 1 | 3 |  | 1 | 1 |   |
|   |   |  | 1 | 2 |   |
| 1 | 4 |  |   |   | 1 |
|   |   |  | 1 | 1 | 1 |
|   |   |  |   |   |   |
| 1 | 2 |  | 1 | 2 | 1 |
|   |   |  |   |   | 1 |
|   |   |  | 1 | 2 | 1 |
|   |   |  |   |   | 1 |
| 1 | 5 |  | 1 | 1 |   |
|   |   |  |   |   |   |
|   |   |  | 1 | 2 |   |
|   |   |  | 1 | 2 |   |
|   |   |  |   |   |   |
|   |   |  | 1 | 2 |   |
|   |   |  |   |   | 1 |
| 1 | 2 |  | 1 | 2 |   |
|   |   |  |   |   | 1 |
|   |   |  | 1 | 2 | 1 |
|   |   |  | 1 | 1 | 1 |
| 1 | 2 |  | 1 | 3 | 1 |
| 1 | 2 |  |   |   |   |
|   |   |  | 1 | 1 | 1 |
| 1 | 1 |  | 1 | 1 | 1 |
|   |   |  |   |   |   |
|   |   |  |   |   | 1 |





1

2

1

2

1

1

1  
1  
1  
1

1

1

1

1

1  
1

1

1

1

1

1

1

1

1  
1

1

2

1

2

1

1

1  
1

1

1

1

1

1

2

1

1

1

1

1

1

1

1  
1

1

1

1

|   |   |   |   |   |
|---|---|---|---|---|
|   |   | 1 | 2 | 1 |
|   |   | 1 | 2 | 1 |
|   |   | 1 | 2 | 1 |
|   |   | 1 | 2 | 1 |
| 1 | 3 | 1 | 1 |   |
| 1 | 3 | 1 | 2 |   |
|   |   | 1 | 1 | 1 |
|   |   | 1 | 2 |   |
|   |   | 1 | 2 | 1 |
|   |   | 1 | 1 | 1 |
| 1 | 3 |   |   |   |
| 1 | 1 |   |   | 1 |
|   |   | 1 | 1 | 1 |
| 1 | 3 |   |   | 1 |
|   |   | 1 | 1 | 1 |
|   |   | 1 | 2 |   |
|   |   | 1 | 2 |   |
|   |   | 1 | 2 | 1 |
|   |   | 1 | 2 | 1 |
|   |   |   |   | 1 |
|   |   | 1 | 1 |   |
|   |   | 1 | 2 | 1 |

|   |   |   |  |   |   |
|---|---|---|--|---|---|
|   |   | 1 |  | 1 |   |
|   |   | 1 |  | 2 | 1 |
|   |   | 1 |  | 2 | 1 |
| 1 |   |   |  |   | 1 |
|   | 2 |   |  |   |   |
|   |   | 1 |  | 2 | 1 |
|   |   |   |  |   | 1 |
|   |   | 1 |  | 3 |   |
|   |   |   |  |   |   |
|   |   | 1 |  | 2 |   |
|   |   |   |  |   | 1 |
|   |   | 1 |  | 1 |   |
|   |   |   |  |   | 1 |
| 1 |   |   |  |   | 1 |
|   | 2 |   |  |   |   |
|   |   |   |  |   | 1 |
|   |   |   |  |   | 1 |
|   |   |   |  |   | 1 |
|   |   | 1 |  | 1 |   |
|   |   |   |  |   | 1 |
| 1 |   | 1 |  | 1 |   |
| 1 |   | 1 |  | 2 |   |
|   | 2 |   |  |   |   |
|   | 3 |   |  |   |   |

|   |   |  |   |  |   |  |  |   |
|---|---|--|---|--|---|--|--|---|
|   |   |  | 1 |  | 1 |  |  | 1 |
|   |   |  | 1 |  | 1 |  |  | 1 |
|   |   |  | 1 |  | 2 |  |  |   |
| 1 | 3 |  | 1 |  | 2 |  |  | 1 |
|   |   |  | 1 |  | 1 |  |  | 1 |
|   |   |  | 1 |  | 1 |  |  |   |
| 1 | 2 |  |   |  |   |  |  |   |
| 1 | 5 |  |   |  |   |  |  |   |
| 1 | 1 |  |   |  |   |  |  |   |
|   |   |  |   |  |   |  |  | 1 |
| 1 | 1 |  | 1 |  | 1 |  |  | 1 |
|   |   |  | 1 |  | 2 |  |  |   |
|   |   |  |   |  |   |  |  | 1 |
|   |   |  | 1 |  | 1 |  |  | 1 |
|   |   |  |   |  |   |  |  | 1 |
|   |   |  |   |  |   |  |  | 1 |
|   |   |  | 1 |  | 2 |  |  | 1 |
|   |   |  | 1 |  | 1 |  |  | 1 |
|   |   |  |   |  |   |  |  | 1 |
| 1 | 1 |  |   |  |   |  |  | 1 |
| 1 | 1 |  |   |  |   |  |  | 1 |

1  
1

1  
2

1

1

1  
1

1  
1

1  
1

1

1

1  
1

1

1  
1  
1  
1  
1

2  
1  
2  
2  
1

1  
1

1

2

1  
1

2  
1

1

2

1

1

1  
1

1

1

1

1

2

1

|   |   |   |   |   |
|---|---|---|---|---|
|   |   | 1 | 1 |   |
|   |   | 1 | 2 |   |
|   |   | 1 | 3 | 1 |
|   |   | 1 | 1 |   |
|   |   | 1 | 1 | 1 |
|   |   | 1 | 2 | 1 |
|   |   | 1 | 1 | 1 |
| 1 | 2 | 1 | 1 |   |
|   |   | 1 | 3 | 1 |
|   |   | 1 |   |   |
| 1 | 2 | 1 | 3 | 1 |
|   |   | 1 | 1 |   |
|   |   |   |   | 1 |
| 1 | 3 |   |   | 1 |
|   |   | 1 | 2 |   |
|   |   |   |   |   |
|   |   | 1 | 1 | 1 |
|   |   | 1 | 1 | 1 |
|   |   |   |   |   |
|   |   | 1 | 1 | 1 |
|   |   | 1 | 1 | 1 |
| 1 | 1 |   |   |   |
|   |   | 1 | 1 |   |
|   |   |   |   |   |
| 1 | 2 |   |   | 1 |
|   |   | 1 | 1 | 1 |
| 1 | 2 | 1 | 1 | 1 |
|   |   |   |   | 1 |
| 1 | 4 | 1 | 2 | 1 |
|   |   |   |   | 1 |
| 1 | 2 |   |   | 1 |
|   |   | 1 | 2 |   |

|   |   |   |   |   |
|---|---|---|---|---|
|   |   | 1 | 1 |   |
|   |   | 1 | 2 | 1 |
|   |   | 1 | 1 |   |
|   |   |   |   | 1 |
|   |   | 1 | 1 | 1 |
|   |   | 1 | 3 | 1 |
|   |   |   |   |   |
|   |   | 1 | 1 |   |
|   |   | 1 | 3 | 1 |
| 1 | 1 | 1 | 3 |   |
|   |   | 1 | 2 | 1 |
|   |   |   |   |   |
| 1 | 5 |   |   |   |
|   |   | 1 | 1 | 1 |
|   |   | 1 | 1 |   |
|   |   |   |   |   |
|   |   | 1 | 2 | 1 |
|   |   |   |   | 1 |
|   |   |   |   | 1 |
|   |   |   |   | 1 |
|   |   |   |   | 1 |
| 1 | 3 |   |   |   |
|   |   |   |   |   |
|   |   | 1 | 1 |   |
|   |   | 1 | 1 | 1 |
|   |   |   |   |   |
|   |   | 1 | 1 | 1 |
|   |   |   |   |   |
|   |   |   |   | 1 |
|   |   |   |   | 1 |
|   |   | 1 | 2 | 1 |
|   |   | 1 | 2 |   |
|   |   |   |   |   |
|   |   | 1 | 1 | 1 |
|   |   |   |   |   |
| 1 | 4 |   |   | 1 |
| 1 | 3 |   |   | 1 |
|   |   |   |   |   |
|   |   | 1 | 1 | 1 |
|   |   | 1 | 1 | 1 |
|   |   |   |   |   |
|   |   | 1 | 1 | 1 |





|   |   |   |  |   |   |
|---|---|---|--|---|---|
|   |   | 1 |  | 1 |   |
|   |   | 1 |  | 1 | 1 |
|   |   |   |  |   | 1 |
|   |   | 1 |  | 2 |   |
|   |   |   |  |   | 1 |
| 1 | 2 |   |  | 2 | 1 |
|   |   | 1 |  |   | 1 |
| 1 | 2 | 1 |  | 2 |   |
| 1 | 1 | 1 |  | 1 | 1 |
|   |   |   |  |   |   |
| 1 | 3 |   |  |   | 1 |
|   |   | 1 |  | 1 | 1 |
|   |   | 1 |  | 2 | 1 |
|   |   | 1 |  | 1 |   |
|   |   | 1 |  | 2 |   |
|   |   |   |  |   | 1 |
| 1 | 2 |   |  |   |   |
|   |   | 1 |  | 1 |   |
|   |   | 1 |  | 1 |   |
|   |   |   |  |   | 1 |
|   |   | 1 |  | 1 | 1 |
|   |   | 1 |  | 4 |   |
| 1 | 2 |   |  |   |   |
|   |   |   |  |   | 1 |
|   |   |   |  |   | 1 |
|   |   | 1 |  | 1 |   |
|   |   | 1 |  | 1 | 1 |
|   |   | 1 |  | 1 | 1 |
| 1 | 4 | 1 |  | 2 |   |
|   |   |   |  |   |   |
|   |   | 1 |  | 2 |   |
|   |   |   |  |   | 1 |
|   |   | 1 |  | 1 | 1 |
| 1 | 2 |   |  |   |   |
| 1 | 2 | 1 |  | 2 |   |
|   |   |   |  |   | 1 |

|   |  |   |  |   |  |  |   |   |
|---|--|---|--|---|--|--|---|---|
|   |  |   |  | 1 |  |  |   | 1 |
|   |  |   |  | 1 |  |  | 1 | 1 |
| 1 |  | 3 |  |   |  |  |   | 1 |
|   |  |   |  | 1 |  |  | 2 |   |
| 1 |  | 2 |  |   |  |  |   |   |
| 1 |  | 2 |  |   |  |  |   |   |
|   |  |   |  | 1 |  |  | 1 | 1 |
| 1 |  | 2 |  | 1 |  |  | 1 | 1 |
|   |  |   |  | 1 |  |  | 2 | 1 |
|   |  |   |  | 1 |  |  | 1 |   |
| 1 |  | 4 |  | 1 |  |  | 2 | 1 |
|   |  |   |  |   |  |  |   |   |
|   |  |   |  | 1 |  |  | 1 | 1 |
|   |  |   |  |   |  |  |   |   |
|   |  |   |  | 1 |  |  | 1 | 1 |
|   |  |   |  | 1 |  |  | 1 | 1 |
|   |  |   |  |   |  |  |   |   |
|   |  |   |  |   |  |  |   | 1 |
|   |  |   |  |   |  |  |   | 1 |
|   |  |   |  |   |  |  |   | 1 |
|   |  |   |  |   |  |  |   |   |
|   |  |   |  | 1 |  |  | 2 | 1 |
|   |  |   |  | 1 |  |  | 2 | 1 |
|   |  |   |  |   |  |  |   |   |
|   |  |   |  | 1 |  |  | 1 | 1 |
|   |  |   |  |   |  |  |   |   |
|   |  |   |  |   |  |  |   | 1 |
| 1 |  | 2 |  |   |  |  |   | 1 |
| 1 |  | 2 |  | 1 |  |  | 2 | 1 |
|   |  |   |  |   |  |  |   |   |
| 1 |  | 2 |  | 1 |  |  | 1 |   |

|   |   |  |   |   |   |
|---|---|--|---|---|---|
|   |   |  | 1 |   | 1 |
|   |   |  | 1 | 1 |   |
|   |   |  | 1 | 1 | 1 |
| 1 | 1 |  |   |   |   |
| 1 | 1 |  |   |   |   |
| 1 | 2 |  |   |   |   |
|   |   |  | 1 | 2 | 1 |
|   |   |  | 1 | 1 | 1 |
|   |   |  |   |   | 1 |
| 1 | 1 |  | 1 | 2 | 1 |
|   |   |  | 1 | 1 | 1 |
|   |   |  | 1 | 1 |   |
|   |   |  | 1 | 1 | 1 |
|   |   |  |   |   | 1 |
| 1 | 5 |  | 1 | 2 |   |
|   |   |  |   |   | 1 |
|   |   |  | 1 | 2 |   |
|   |   |  | 1 | 3 | 1 |
|   |   |  |   |   |   |
|   |   |  | 1 | 2 |   |
|   |   |  | 1 | 2 | 1 |
|   |   |  |   |   |   |
|   |   |  | 1 | 2 | 1 |
|   |   |  | 1 | 2 |   |
| 1 | 4 |  | 1 | 2 | 1 |
|   |   |  | 1 | 2 |   |
| 1 | 3 |  |   |   | 1 |
|   |   |  |   |   |   |
| 1 | 4 |  | 1 | 2 | 1 |
| 1 | 3 |  | 1 | 2 | 1 |
| 1 | 2 |  |   |   |   |
|   |   |  |   |   | 1 |
|   |   |  | 1 | 1 |   |
|   |   |  | 1 | 1 |   |
|   |   |  |   |   |   |
| 1 | 1 |  | 1 | 1 | 1 |
|   |   |  |   |   | 1 |
|   |   |  |   |   | 1 |
| 1 | 1 |  |   |   |   |
|   |   |  | 1 | 1 |   |

|   |   |   |   |   |
|---|---|---|---|---|
|   |   | 1 | 2 |   |
| 1 | 3 | 1 | 2 | 1 |
|   |   |   |   | 1 |
|   |   | 1 | 2 |   |
| 1 | 2 | 1 | 1 | 1 |
|   |   | 1 | 1 | 1 |
|   |   | 1 | 1 |   |
|   |   | 1 | 2 | 1 |
|   |   | 1 | 1 | 1 |
| 1 | 1 | 1 | 1 |   |
| 1 | 1 |   |   |   |
| 1 | 2 | 1 | 2 |   |
| 1 | 2 |   |   |   |
|   | 4 | 1 | 1 | 1 |
| 1 | 1 |   |   |   |
|   |   | 1 | 2 | 1 |
|   |   | 1 | 2 | 1 |
|   |   | 1 | 2 |   |
|   |   | 1 | 2 |   |
|   |   |   |   | 1 |
| 1 | 2 | 1 | 1 | 1 |
| 1 | 4 | 1 | 2 | 1 |
|   |   | 1 | 2 |   |
|   |   | 1 | 2 | 1 |
|   |   | 1 | 2 | 1 |
|   |   | 1 | 2 |   |
|   |   | 1 | 1 |   |
|   |   | 1 | 2 |   |

|   |   |   |   |   |
|---|---|---|---|---|
|   |   | 1 | 3 | 1 |
| 1 | 2 |   |   | 1 |
|   |   | 1 | 2 |   |
| 1 | 3 | 1 | 1 |   |
|   |   | 1 | 2 | 1 |
| 1 | 1 | 1 | 2 | 1 |
|   |   | 1 | 1 |   |
| 1 | 2 |   |   | 1 |
|   |   | 1 | 1 |   |
|   |   |   |   | 1 |
|   |   | 1 | 2 | 1 |
|   |   | 1 | 2 |   |
|   |   | 1 | 2 |   |
|   |   | 1 | 1 | 1 |
|   |   |   |   | 1 |
|   |   | 1 | 3 |   |
| 1 | 4 |   |   |   |
|   |   | 1 | 2 | 1 |
|   |   |   |   |   |
|   |   | 1 | 2 | 1 |
| 1 | 2 | 1 | 1 | 1 |
|   |   |   |   |   |
|   |   | 1 | 1 | 1 |
|   |   | 1 | 2 |   |
|   |   |   |   | 1 |
|   |   | 1 | 1 |   |
|   |   |   |   | 1 |
|   |   | 1 | 2 |   |
|   |   | 1 | 2 |   |
|   |   | 1 | 1 | 1 |
| 1 | 2 |   |   | 1 |
|   |   | 1 | 2 |   |

|   |   |   |  |   |   |
|---|---|---|--|---|---|
|   |   | 1 |  | 1 |   |
| 1 | 3 | 1 |  | 2 | 1 |
|   |   |   |  |   | 1 |
|   |   | 1 |  | 2 | 1 |
|   |   | 1 |  | 1 |   |
| 1 | 2 |   |  |   |   |
|   |   | 1 |  | 2 |   |
| 1 | 1 | 1 |  | 1 | 1 |
|   |   | 1 |  | 2 | 1 |
|   |   |   |  |   |   |
| 1 | 2 | 1 |  | 2 | 1 |
|   |   |   |  |   | 1 |
| 1 | 1 | 1 |  | 2 |   |
|   |   |   |  |   |   |
|   |   | 1 |  | 1 | 1 |
|   |   |   |  |   |   |
|   |   | 1 |  | 2 | 1 |
|   |   | 1 |  | 1 |   |
| 1 | 4 |   |  |   | 1 |
|   |   | 1 |  | 2 |   |
| 1 | 1 |   |  |   | 1 |
|   |   |   |  |   | 1 |
|   |   | 1 |  | 1 | 1 |
|   |   | 1 |  | 2 |   |
|   |   |   |  |   | 1 |
|   |   |   |  |   | 1 |
|   |   | 1 |  | 2 |   |
|   |   |   |  |   |   |
|   |   |   |  |   | 1 |
|   |   |   |  |   | 1 |
|   |   | 1 |  | 1 | 1 |

|   |   |   |  |   |  |   |
|---|---|---|--|---|--|---|
|   |   | 1 |  | 1 |  | 1 |
|   |   |   |  |   |  |   |
|   |   | 1 |  | 2 |  | 1 |
| 1 | 2 | 1 |  | 2 |  | 1 |
|   |   | 1 |  | 2 |  | 1 |
| 1 | 3 |   |  |   |  | 1 |
|   |   |   |  |   |  | 1 |
|   |   | 1 |  | 2 |  | 1 |
| 1 | 2 | 1 |  | 1 |  |   |
|   |   |   |  |   |  |   |
|   |   | 1 |  | 1 |  | 1 |
|   |   |   |  |   |  |   |
| 1 | 2 | 1 |  | 2 |  | 1 |
|   |   | 1 |  | 1 |  |   |
|   |   |   |  |   |  |   |
|   |   | 1 |  | 1 |  | 1 |
|   |   | 1 |  | 2 |  |   |
|   |   |   |  |   |  |   |
|   |   | 1 |  | 1 |  | 1 |
|   |   |   |  |   |  |   |
|   |   | 1 |  | 1 |  | 1 |
|   |   |   |  |   |  |   |
| 1 | 1 |   |  |   |  |   |
|   |   | 1 |  | 1 |  | 1 |

|   |   |  |   |   |   |  |   |
|---|---|--|---|---|---|--|---|
|   |   |  |   | 1 |   |  | 1 |
|   |   |  |   |   |   |  | 1 |
|   |   |  | 1 |   | 2 |  |   |
| 1 | 2 |  |   |   |   |  | 1 |
|   |   |  |   |   |   |  | 1 |
|   |   |  |   |   |   |  |   |
|   |   |  |   |   |   |  | 1 |
|   |   |  |   |   |   |  | 1 |
|   |   |  | 1 |   | 2 |  | 1 |
| 1 | 4 |  |   |   |   |  | 1 |
|   |   |  |   |   |   |  |   |
|   |   |  | 1 |   | 2 |  |   |
|   |   |  |   |   |   |  |   |
|   |   |  | 1 |   | 1 |  |   |
| 1 | 2 |  |   |   |   |  | 1 |
|   |   |  |   |   |   |  | 1 |
| 1 | 1 |  |   |   |   |  | 1 |
| 1 | 1 |  | 1 |   | 1 |  | 1 |
|   |   |  |   |   |   |  |   |
|   |   |  |   |   |   |  | 1 |
|   |   |  |   |   |   |  |   |
| 1 | 2 |  | 1 |   | 2 |  | 1 |
|   |   |  | 1 |   | 1 |  |   |
|   |   |  |   |   |   |  |   |
|   |   |  | 1 |   | 2 |  |   |
|   |   |  |   |   |   |  |   |
| 1 | 4 |  | 1 |   | 2 |  | 1 |
|   |   |  |   |   |   |  | 1 |





|   |   |   |  |   |   |
|---|---|---|--|---|---|
|   |   | 1 |  | 2 |   |
|   |   | 1 |  | 1 | 1 |
|   |   | 1 |  | 3 | 1 |
|   |   | 1 |  | 2 | 1 |
|   |   | 1 |  | 2 |   |
| 1 | 2 | 1 |  | 1 | 1 |
|   |   | 1 |  | 1 | 1 |
|   |   | 1 |  | 1 | 1 |
|   |   | 1 |  | 2 |   |
|   |   | 1 |  | 2 |   |
|   |   |   |  |   | 1 |
|   |   | 1 |  | 1 |   |
|   |   | 1 |  | 2 | 1 |
|   |   | 1 |  | 3 | 1 |
|   |   |   |  |   | 1 |
| 1 | 3 | 1 |  | 2 | 1 |
| 1 | 1 | 1 |  | 2 | 1 |
|   |   | 1 |  | 2 |   |
|   |   | 1 |  | 2 |   |
|   |   | 1 |  | 1 | 1 |
|   |   | 1 |  | 1 | 1 |
|   |   | 1 |  | 2 |   |
|   |   | 1 |  | 2 | 1 |
|   |   | 1 |  | 1 | 1 |
|   |   | 1 |  | 1 | 1 |
| 1 | 1 | 1 |  | 1 | 1 |
|   |   | 1 |  | 3 |   |

|   |  |   |  |   |  |  |   |   |
|---|--|---|--|---|--|--|---|---|
|   |  |   |  | 1 |  |  |   | 1 |
|   |  |   |  | 1 |  |  | 1 | 1 |
|   |  |   |  |   |  |  |   | 1 |
|   |  |   |  | 1 |  |  | 2 | 1 |
|   |  |   |  | 1 |  |  | 2 | 1 |
|   |  |   |  |   |  |  |   |   |
|   |  |   |  |   |  |  |   | 1 |
|   |  |   |  | 1 |  |  | 2 | 1 |
|   |  |   |  | 1 |  |  | 1 | 1 |
| 1 |  | 2 |  | 1 |  |  | 1 | 1 |
|   |  |   |  | 1 |  |  | 3 | 1 |
|   |  |   |  |   |  |  |   |   |
|   |  |   |  |   |  |  |   | 1 |
| 1 |  | 4 |  | 1 |  |  | 2 |   |
|   |  |   |  |   |  |  |   |   |
|   |  |   |  | 1 |  |  |   | 1 |
|   |  |   |  |   |  |  | 2 | 1 |
|   |  |   |  | 1 |  |  |   | 1 |
|   |  |   |  |   |  |  |   | 1 |
|   |  |   |  | 1 |  |  | 2 |   |
|   |  |   |  |   |  |  |   |   |
|   |  |   |  | 1 |  |  |   | 1 |
|   |  |   |  |   |  |  |   | 1 |
|   |  |   |  | 1 |  |  | 1 | 1 |
|   |  |   |  |   |  |  |   |   |
|   |  |   |  | 1 |  |  | 1 | 1 |
|   |  |   |  |   |  |  |   |   |
|   |  |   |  | 1 |  |  | 1 | 1 |
|   |  |   |  |   |  |  |   |   |
| 1 |  | 2 |  | 1 |  |  |   | 1 |
|   |  |   |  |   |  |  |   | 1 |
| 1 |  | 1 |  |   |  |  |   |   |

|   |   |   |  |   |   |
|---|---|---|--|---|---|
|   |   | 1 |  | 2 |   |
| 1 | 1 | 1 |  | 2 | 1 |
| 1 | 2 |   |  |   |   |
|   |   |   |  |   | 1 |
|   |   | 1 |  | 2 |   |
|   |   | 1 |  | 1 |   |
| 1 | 2 |   |  |   | 1 |
|   |   |   |  |   |   |
|   |   | 1 |  | 2 |   |
|   |   | 1 |  | 2 |   |
|   |   |   |  |   | 1 |
|   |   |   |  |   | 1 |
|   |   | 1 |  | 1 | 1 |
|   |   |   |  |   |   |
| 1 | 1 |   |  |   |   |
| 1 | 1 |   |  |   |   |
|   |   | 1 |  | 2 | 1 |
|   |   | 1 |  | 2 |   |
|   |   | 1 |  | 1 | 1 |
| 1 | 2 | 1 |  | 2 | 1 |
|   |   |   |  |   |   |
|   |   | 1 |  | 2 | 1 |
|   |   |   |  |   |   |
| 1 | 1 |   |  |   | 1 |
|   |   | 1 |  | 1 | 1 |
|   |   |   |  |   | 1 |
|   |   | 1 |  | 1 |   |
|   |   | 1 |  | 2 |   |
|   |   | 1 |  | 2 |   |
|   |   |   |  |   |   |
|   |   | 1 |  | 2 |   |
|   |   | 1 |  | 1 | 1 |
|   |   | 1 |  | 2 | 1 |
|   |   | 1 |  | 2 | 1 |

|   |   |   |  |   |   |
|---|---|---|--|---|---|
|   |   | 1 |  | 1 |   |
|   |   | 1 |  | 1 |   |
|   |   | 1 |  | 2 |   |
|   |   |   |  |   | 1 |
|   |   | 1 |  | 1 | 1 |
|   |   | 1 |  | 2 | 1 |
|   |   |   |  |   |   |
|   |   | 1 |  | 1 | 1 |
|   |   | 1 |  | 2 | 1 |
| 1 | 1 |   |  |   | 1 |
|   |   | 1 |  | 1 | 1 |
|   |   | 1 |  | 2 | 1 |
|   |   | 1 |  | 2 | 1 |
|   |   | 1 |  | 1 |   |
|   |   |   |  |   | 1 |
|   |   | 1 |  | 1 | 1 |
| 1 | 4 | 1 |  | 1 | 1 |
|   |   | 1 |  | 1 | 1 |
|   |   | 1 |  |   |   |
| 1 | 3 | 1 |  | 1 |   |
|   |   |   |  |   | 1 |
|   |   | 1 |  | 1 |   |
|   |   | 1 |  | 2 | 1 |
|   |   | 1 |  | 1 | 1 |
|   |   | 1 |  | 3 | 1 |
|   |   |   |  |   |   |
|   |   | 1 |  | 1 |   |
|   |   | 1 |  | 3 | 1 |
|   |   |   |  |   |   |
|   |   | 1 |  | 1 | 1 |
| 1 | 4 | 1 |  | 1 | 1 |
|   |   |   |  |   | 1 |
|   |   | 1 |  | 2 | 1 |
| 1 | 1 | 1 |  | 1 | 1 |
|   |   |   |  |   | 1 |
| 1 | 4 |   |  |   | 1 |

|   |   |   |   |   |
|---|---|---|---|---|
| 1 | 1 | 1 | 1 | 1 |
|   |   |   |   |   |
|   |   | 1 | 2 | 1 |
| 1 | 1 |   |   | 1 |
|   |   |   |   | 1 |
|   |   | 1 | 2 |   |
|   |   | 1 | 2 | 1 |
|   |   | 1 | 1 | 1 |
|   |   |   |   |   |
| 1 | 1 |   |   |   |
|   |   | 1 | 2 | 1 |
|   |   |   |   |   |
| 1 | 2 |   |   | 1 |
|   |   |   |   |   |
| 1 | 1 |   |   |   |
|   |   | 1 | 1 |   |
|   |   | 1 | 2 | 1 |
|   |   |   |   |   |
|   |   | 1 | 2 | 1 |
|   |   |   |   |   |
|   |   | 1 | 2 |   |
|   |   | 1 | 2 |   |
|   |   | 1 | 2 | 1 |
|   |   |   |   |   |
| 1 | 4 | 1 | 1 |   |
|   |   | 1 | 2 |   |
|   |   |   |   |   |
| 1 | 3 |   |   | 1 |

AIS\_Score\_Lower\_Extremity AIS\_External AIS\_Score\_External ISS\_ScoreAnzahl\_Diagnosen

|   |   |   |    |
|---|---|---|----|
|   |   |   | 5  |
|   |   |   | 3  |
|   |   |   | 4  |
|   |   |   | 1  |
| 2 |   |   | 2  |
|   |   |   | 7  |
|   |   |   | 4  |
|   |   |   | 1  |
|   |   |   | 4  |
| 1 |   |   | 5  |
| 1 |   |   | 6  |
| 3 |   |   | 5  |
|   |   |   | 3  |
|   | 1 | 1 | 2  |
|   |   |   | 3  |
| 2 |   |   | 4  |
|   |   |   | 6  |
|   |   |   | 2  |
|   |   |   | 5  |
|   |   |   | 2  |
|   |   |   | 2  |
|   |   |   | 4  |
|   |   |   | 1  |
|   |   |   | 3  |
|   |   |   | 3  |
|   |   |   | 6  |
|   |   |   | 2  |
|   |   |   | 1  |
|   |   |   | 4  |
|   |   |   | 2  |
|   |   |   | 3  |
|   |   |   | 1  |
|   |   |   | 1  |
|   |   |   | 1  |
|   |   |   | 1  |
|   |   |   | 1  |
|   |   |   | 10 |
|   |   |   | 2  |
| 1 | 1 | 1 | 4  |
|   |   |   | 7  |
|   |   |   | 2  |
|   |   |   | 2  |
|   |   |   | 1  |
| 3 |   |   | 1  |

|   |   |   |    |
|---|---|---|----|
|   |   |   | 2  |
|   |   |   | 3  |
|   |   |   | 13 |
|   |   |   | 2  |
|   |   |   | 3  |
|   |   |   | 2  |
|   |   |   | 4  |
|   |   |   | 5  |
|   | 1 | 1 | 4  |
|   |   |   | 7  |
|   | 1 | 1 | 5  |
|   |   |   | 13 |
| 3 |   |   | 4  |
|   |   |   | 1  |
|   |   |   | 3  |
|   |   |   | 2  |
| 2 |   |   | 6  |
|   | 1 | 1 | 3  |
|   |   |   | 2  |
|   | 1 | 1 | 4  |
|   |   |   | 2  |
|   |   |   | 3  |
|   |   |   | 5  |
|   |   |   | 9  |
|   |   |   | 2  |
|   |   |   | 1  |
| 1 |   |   | 6  |
|   |   |   | 2  |
|   |   |   | 8  |
| 1 |   |   | 4  |
| 1 |   |   | 1  |
|   |   |   | 1  |
|   |   |   | 4  |
| 1 |   |   | 10 |
| 2 |   |   | 7  |
|   |   |   | 7  |
|   |   |   | 7  |
|   |   |   | 2  |
|   |   |   | 4  |
|   |   |   | 1  |
|   |   |   | 2  |
|   |   |   | 2  |
| 3 |   |   | 8  |
| 3 |   |   | 13 |
| 1 | 1 | 1 | 5  |



|   |    |
|---|----|
|   | 4  |
| 3 | 2  |
|   | 3  |
| 1 | 8  |
|   | 2  |
|   | 2  |
|   | 3  |
|   | 5  |
|   | 2  |
|   | 2  |
|   | 3  |
|   | 1  |
|   | 2  |
|   | 4  |
| 3 | 5  |
|   | 2  |
|   | 2  |
|   | 4  |
| 2 | 13 |
|   | 2  |
|   | 2  |
|   | 2  |
| 1 | 3  |
|   | 1  |
| 2 | 4  |
|   | 4  |
| 2 | 6  |
|   | 2  |
| 1 | 7  |
|   | 4  |
|   | 1  |
|   | 1  |
| 3 | 9  |
| 2 | 4  |
|   | 2  |
|   | 7  |
|   | 6  |
|   | 4  |
| 1 | 5  |
|   | 2  |
|   |    |
| 1 | 3  |
|   | 7  |
| 1 | 2  |
|   |    |
|   | 2  |

1  
3

3  
4  
1  
3

1  
1

1

3  
2

2

3  
2  
2  
1  
1

3  
2

2  
1

1

2

2  
14  
2  
1  
5  
1  
7  
15  
4  
5  
1  
2  
1  
12  
2  
5  
2  
3  
1  
4  
3  
7  
10  
8  
10  
6  
6  
5  
3  
3  
5  
8  
12  
4  
2  
5  
1  
2  
3  
5  
3  
4  
4  
3  
10  
7

3

2

3

4

1

13

1

2

1

6

1

1

1

10

1

4

2

14

1

7

1

2

2

1

1

3

1

3

2

2

1

2

4

4

3

9

2

7

1

1

1

2

2

5

3

2

2

6

2

3

3

3

5

3

4

6

8

5

4

5

13

5

2

6

6

6

3

3

6

5

7

3  
1  
1

2  
1

1

2

1

2

1

2

1

1

1

1

3

1

1

3

1

5  
5  
6

4  
2  
5

6  
14  
2

7  
3  
3

7  
3  
3

7  
6  
3

2  
9  
1

13  
7  
3

3  
6  
13

5  
2  
5

2  
4  
1

4  
1  
4

3  
10  
4

4  
10  
6

6  
6  
4

12

3

3

1

1

1

2

1

2

3

1

3

1

1

3

2

3

1

1

3

13

17

4

2

6

5

4

4

9

6

7

1

7

2

4

6

1

8

7

7

2

7

6

8

21

1

3

5

5

5

5

6

2

4

4

3

7

4

12

9

8

5

5

10

2

3

1  
1

3

3

4

2

1

1

1

2

2

1

1

2

1

1

2

3

4

4

2

1

1

6

2

6

11

6

1

2

20

4

2

1

3

12

7

16

2

9

2

13

4

3

1

9

6

4

4

6

4

3

20

4

8

2

4

12

9

6

3

1

4

2

1  
1  
1  
3

1  
3

1

3  
1

5  
1

1

1  
3

1

1

2

11  
2  
5  
3  
2  
2  
1  
4  
4  
4  
1  
4  
6  
2  
4  
4  
2  
5  
8  
5  
4  
3  
2  
8  
7  
2  
2  
2  
4  
1  
4  
4  
4  
3  
4  
3  
1  
5  
3  
4  
4  
11  
2  
3  
3  
5  
2

|   |   |   |    |
|---|---|---|----|
|   |   |   | 6  |
| 2 |   |   | 20 |
| 1 |   |   | 4  |
| 3 |   |   | 12 |
| 1 |   |   | 3  |
| 1 |   |   | 7  |
|   |   |   | 5  |
|   |   |   | 4  |
| 1 |   |   | 7  |
|   |   |   | 2  |
|   |   |   | 3  |
|   |   |   | 3  |
|   |   |   | 6  |
| 1 |   |   | 3  |
| 1 |   |   | 5  |
|   |   |   | 9  |
| 1 |   |   | 3  |
| 1 |   |   | 7  |
|   |   |   | 1  |
|   |   |   | 8  |
| 1 |   |   | 5  |
|   |   |   | 2  |
| 1 |   |   | 4  |
|   |   |   | 2  |
|   |   |   | 8  |
| 3 |   |   | 8  |
|   |   |   | 3  |
| 2 |   |   | 6  |
|   |   |   | 1  |
|   |   |   | 6  |
|   |   |   | 8  |
|   |   |   | 2  |
|   |   |   | 11 |
|   |   |   | 8  |
|   |   |   | 4  |
|   |   |   | 5  |
| 1 |   |   | 5  |
|   |   |   | 5  |
| 1 |   |   | 5  |
|   |   |   | 3  |
| 2 |   |   | 11 |
|   |   |   | 7  |
|   |   |   | 4  |
|   |   |   | 4  |
|   |   |   | 5  |
| 3 | 1 | 1 | 7  |



|   |   |  |   |    |
|---|---|--|---|----|
|   |   |  |   | 6  |
| 2 |   |  |   | 13 |
| 2 |   |  |   | 12 |
| 3 |   |  |   | 8  |
|   |   |  |   | 7  |
|   |   |  |   | 3  |
|   |   |  |   | 3  |
| 1 |   |  |   | 4  |
| 1 |   |  |   | 7  |
|   | 1 |  | 1 | 4  |
|   |   |  |   | 6  |
|   |   |  |   | 3  |
| 1 |   |  |   | 4  |
|   |   |  |   | 2  |
|   |   |  |   | 2  |
|   |   |  |   | 4  |
|   |   |  |   | 5  |
|   |   |  |   | 6  |
|   |   |  |   | 5  |
|   |   |  |   | 6  |
|   |   |  |   | 2  |
| 1 |   |  |   | 7  |
|   |   |  |   | 2  |
|   |   |  |   | 8  |
|   |   |  |   | 2  |
| 1 |   |  |   | 4  |
|   |   |  |   | 2  |
|   |   |  |   | 9  |
|   |   |  |   | 5  |
| 3 |   |  |   | 3  |
|   |   |  |   | 5  |
| 1 |   |  |   | 2  |
| 4 | 1 |  | 1 | 3  |
|   |   |  |   | 4  |
| 1 |   |  |   | 5  |
|   |   |  |   | 2  |
|   |   |  |   | 3  |
|   | 1 |  | 1 | 2  |
|   |   |  |   | 13 |
|   |   |  |   | 2  |
| 3 |   |  |   | 9  |
|   |   |  |   | 4  |
|   |   |  |   | 6  |
|   |   |  |   | 6  |

1

1

1

1

2

2

2

4

2

1

2

2

2

1

5

3

2

1

2

1

15

1

5

9

7

4

1

5

5

13

9

7

2

9

4

5

2

7

1

2

2

2

2

1

5

6

1

2

5

2

8

2

1

4

2

5

1

5

3

2

2

7

4

3

6

1

2

2

1

1

1

4

1

1

2

4

1

1

3

3

17

3

1

2

4

2

1

3

2

1

3

6

1

3

2

2

2

7

4

1

2

3

3

2

2

5

10

6

3

3

6

10

8

6

1

4

1

11

4

3

3

5

8

6

3

1

1

1

3

3

3

3

1

1

1

3

4

1

1

2

3

2

1

9

7

9

1

10

3

4

10

11

4

8

3

5

2

5

5

1

2

1

11

6

3

4

10

2

5

4

5

5

2

3

2

2

5

6

3

7

5

7

8

9

16

5

4

9

3

|   |   |   |    |
|---|---|---|----|
|   |   |   | 3  |
| 1 |   |   | 11 |
|   |   |   | 4  |
| 1 |   |   | 8  |
| 1 |   |   | 6  |
| 3 |   |   | 5  |
|   |   |   | 2  |
|   |   |   | 2  |
|   |   |   | 1  |
| 3 |   |   | 8  |
|   | 1 | 2 | 7  |
|   |   |   | 3  |
|   |   |   | 7  |
| 1 |   |   | 4  |
|   |   |   | 3  |
|   |   |   | 2  |
|   |   |   | 11 |
|   |   |   | 6  |
| 2 |   |   | 6  |
|   |   |   | 1  |
| 3 |   |   | 8  |
| 3 |   |   | 1  |
| 3 |   |   | 1  |
| 1 |   |   | 3  |
| 1 |   |   | 3  |
|   |   |   | 3  |
|   |   |   | 1  |
|   |   |   | 7  |
| 1 |   |   | 11 |
|   |   |   | 2  |
| 1 |   |   | 4  |
|   |   |   | 3  |
| 1 |   |   | 4  |
| 3 |   |   | 3  |
| 1 |   |   | 8  |
|   |   |   | 10 |
|   |   |   | 10 |
| 2 |   |   | 7  |
|   |   |   | 1  |
| 4 |   |   | 6  |
|   |   |   | 6  |
| 3 |   |   | 3  |
| 1 |   |   | 3  |
|   |   |   | 2  |
|   |   |   | 6  |
| 1 |   |   | 6  |

1

3

1

3

1

2

1

3

1

3

4

1

3

1

2

1

1

1

1

1

1

3

1

1

1

3

4

9

2

6

10

3

4

4

6

9

2

3

4

3

2

4

17

11

5

4

9

2

2

5

4

6

5

9

4

5

6

12

2

2

12

8

4

3

6

8

2

3

9

9

6

|   |    |
|---|----|
|   | 10 |
| 1 | 6  |
| 3 | 4  |
|   | 6  |
|   | 2  |
| 1 | 6  |
|   | 3  |
|   | 4  |
|   | 9  |
| 1 | 7  |
| 2 | 2  |
|   | 12 |
| 2 | 8  |
|   | 6  |
|   | 1  |
|   | 2  |
| 2 | 5  |
| 1 | 5  |
| 1 | 3  |
|   | 7  |
|   | 4  |
|   | 2  |
| 2 | 4  |
|   | 11 |
|   | 10 |
|   | 8  |
|   | 7  |
| 3 | 4  |
| 1 | 3  |
|   | 3  |
|   | 6  |
|   | 3  |
| 2 | 16 |
| 3 | 1  |
|   | 3  |
|   | 3  |
| 2 | 6  |
| 2 | 3  |
|   | 10 |
|   | 2  |
|   | 3  |
| 2 | 3  |
| 1 | 3  |
|   | 12 |
|   | 17 |
| 2 | 13 |

2

1

3

1

3

2

3

1

1

1

1

1

2

2

3

4

2

3

1

3

3

8

9

2

18

4

2

2

6

7

5

4

4

7

11

3

8

3

4

12

4

3

6

4

7

7

3

7

3

3

15

6

3

6

8

3

2

8

2

7

5

13

12

5

9

4

8



|   |   |   |    |
|---|---|---|----|
| 1 |   |   | 22 |
|   |   |   | 9  |
| 1 |   |   | 4  |
|   |   |   | 3  |
|   |   |   | 3  |
|   |   |   | 8  |
| 2 |   |   | 4  |
| 1 | 1 | 3 | 4  |
| 1 | 1 | 2 | 8  |
| 3 |   |   | 3  |
| 1 |   |   | 6  |
|   |   |   | 4  |
|   |   |   | 10 |
| 1 |   |   | 8  |
| 1 |   |   | 3  |
|   |   |   | 4  |
| 3 |   |   | 2  |
|   |   |   | 1  |
|   |   |   | 2  |
| 3 |   |   | 6  |
|   |   |   | 4  |
|   |   |   | 10 |
| 1 |   |   | 5  |
|   |   |   | 10 |
| 1 |   |   | 13 |
|   |   |   | 4  |
| 3 |   |   | 14 |
|   | 1 | 2 | 19 |
| 2 |   |   | 5  |
|   |   |   | 7  |
|   |   |   | 1  |
| 4 |   |   | 20 |
| 3 | 1 | 1 | 11 |
|   |   |   | 7  |
| 1 |   |   | 9  |
|   |   |   | 9  |
|   |   |   | 4  |
|   |   |   | 10 |
|   |   |   | 5  |
|   |   |   | 2  |
| 1 |   |   | 9  |
| 4 |   |   | 2  |
| 2 |   |   | 4  |
|   |   |   | 5  |
|   |   |   | 7  |

|   |    |
|---|----|
|   | 4  |
|   | 7  |
|   | 13 |
| 2 | 3  |
| 1 | 4  |
|   | 8  |
| 1 | 4  |
| 1 | 13 |
| 1 | 5  |
|   | 2  |
|   | 5  |
| 3 | 1  |
|   | 1  |
| 2 | 9  |
|   | 8  |
|   | 4  |
| 1 | 15 |
|   | 9  |
|   | 4  |
|   | 2  |
|   | 13 |
|   | 3  |
|   | 5  |
| 1 | 4  |
|   | 7  |
|   | 8  |
|   | 3  |
| 5 | 6  |
| 2 | 6  |
|   | 2  |
|   | 10 |
|   | 5  |
|   | 4  |
| 1 | 9  |
| 3 | 2  |
| 1 | 8  |
| 1 | 7  |
|   | 8  |
|   | 3  |
| 3 | 8  |
| 1 | 12 |
| 1 | 4  |
|   | 6  |
|   | 3  |
|   | 2  |
|   | 5  |

|   |   |   |    |
|---|---|---|----|
|   |   |   | 2  |
| 2 |   |   | 12 |
| 2 |   |   | 11 |
|   |   |   | 5  |
|   |   |   | 4  |
|   |   |   | 4  |
| 3 |   |   | 1  |
| 3 |   |   | 7  |
|   | 1 | 1 | 3  |
| 1 |   |   | 11 |
|   |   |   | 2  |
|   |   |   | 5  |
| 2 |   |   | 6  |
|   |   |   | 5  |
| 1 |   |   | 3  |
|   |   |   | 3  |
|   |   |   | 2  |
|   |   |   | 2  |
| 3 |   |   | 3  |
|   |   |   | 3  |
|   |   |   | 10 |
|   |   |   | 5  |
| 1 |   |   | 4  |
| 3 |   |   | 9  |
|   |   |   | 1  |
|   |   |   | 2  |
|   |   |   | 3  |
| 3 |   |   | 2  |
|   |   |   | 3  |
|   |   |   | 7  |
| 2 |   |   | 5  |
| 3 |   |   | 13 |
| 1 |   |   | 7  |
|   |   |   | 6  |
|   |   |   | 6  |
| 1 |   |   | 4  |
|   |   |   | 15 |
| 1 |   |   | 12 |
|   |   |   | 3  |
|   |   |   | 4  |
| 1 |   |   | 2  |
|   |   |   | 1  |
|   |   |   | 2  |
| 1 |   |   | 6  |
| 2 |   |   | 8  |
|   |   |   | 7  |

|   |   |  |   |  |    |
|---|---|--|---|--|----|
|   |   |  |   |  | 6  |
| 3 |   |  |   |  | 12 |
| 1 |   |  |   |  | 8  |
|   |   |  |   |  | 3  |
|   |   |  |   |  | 5  |
|   |   |  |   |  | 6  |
|   |   |  |   |  | 3  |
|   |   |  |   |  | 4  |
| 2 |   |  |   |  | 10 |
|   |   |  |   |  | 2  |
|   |   |  |   |  | 2  |
|   |   |  |   |  | 2  |
|   |   |  |   |  | 4  |
|   |   |  |   |  | 2  |
|   |   |  |   |  | 4  |
| 2 |   |  |   |  | 8  |
|   |   |  |   |  | 2  |
| 3 |   |  |   |  | 3  |
|   |   |  |   |  | 5  |
|   |   |  |   |  | 6  |
|   |   |  |   |  | 6  |
| 1 |   |  |   |  | 6  |
| 1 |   |  |   |  | 3  |
|   |   |  |   |  | 9  |
|   | 1 |  | 1 |  | 5  |
|   |   |  |   |  | 4  |
| 2 |   |  |   |  | 3  |
|   |   |  |   |  | 3  |
| 1 |   |  |   |  | 5  |
|   |   |  |   |  | 2  |
|   |   |  |   |  | 1  |
| 2 |   |  |   |  | 2  |
|   |   |  |   |  | 5  |
| 2 |   |  |   |  | 5  |
| 3 |   |  |   |  | 5  |
| 1 |   |  |   |  | 5  |
|   |   |  |   |  | 4  |
| 2 |   |  |   |  | 3  |
| 2 |   |  |   |  | 3  |
|   |   |  |   |  | 10 |
|   |   |  |   |  | 7  |
| 1 |   |  |   |  | 3  |
| 1 |   |  |   |  | 4  |
|   |   |  |   |  | 9  |
| 2 |   |  |   |  | 4  |
|   |   |  |   |  | 4  |

1

1

3

2

2

1

1

1

3

1

1

1

1

1

1

1

1

1

6  
2  
2  
11  
1  
6  
2  
2  
1  
4  
4  
5  
5  
12  
11  
1  
3  
1  
1  
7  
2  
8  
2  
6  
3  
3  
11  
3  
3  
7  
5  
6  
1  
2  
3  
13  
2  
4  
4  
9  
8  
4  
2  
2  
2  
4

1

1

1

3

1

1

1

1

1

1

3

1

1

1

1

2

2

3

8

1

15

6

11

5

7

2

4

9

9

5

1

6

2

4

5

1

1

1

2

3

5

2

3

2

5

1

8

1

2

2

6

4

2

4

2

8

4

4

10

1

2

9

7

2

|   |   |   |    |
|---|---|---|----|
|   |   |   | 10 |
|   | 1 | 3 | 1  |
| 2 | 1 | 5 | 2  |
|   |   |   | 4  |
|   |   |   | 6  |
|   |   |   | 3  |
|   |   |   | 6  |
|   |   |   | 5  |
| 1 |   |   | 1  |
|   |   |   | 2  |
| 2 |   |   | 6  |
| 2 |   |   | 6  |
|   |   |   | 2  |
|   |   |   | 3  |
| 1 |   |   | 6  |
|   | 1 | 1 | 4  |
| 1 |   |   | 5  |
| 3 |   |   | 2  |
|   |   |   | 3  |
| 1 |   |   | 3  |
| 1 |   |   | 13 |
|   |   |   | 5  |
|   |   |   | 4  |
|   |   |   | 3  |
| 1 |   |   | 2  |
|   |   |   | 3  |
|   |   |   | 10 |
|   | 1 | 3 | 2  |
|   |   |   | 1  |
|   |   |   | 1  |
|   |   |   | 2  |
|   |   |   | 2  |
| 3 |   |   | 5  |
|   |   |   | 5  |
|   |   |   | 7  |
| 2 |   |   | 4  |
| 3 |   |   | 8  |
| 1 |   |   | 7  |
| 1 |   |   | 4  |
| 2 |   |   | 3  |
|   |   |   | 3  |
| 5 | 1 | 2 | 2  |
| 1 |   |   | 4  |
| 3 |   |   | 3  |
|   |   |   | 3  |
| 3 |   |   | 2  |

|   |   |  |   |    |
|---|---|--|---|----|
|   |   |  |   | 7  |
|   |   |  |   | 3  |
| 2 |   |  |   | 3  |
| 1 |   |  |   | 6  |
|   |   |  |   | 2  |
| 2 | 1 |  | 3 | 7  |
| 2 |   |  |   | 16 |
|   |   |  |   | 6  |
|   |   |  |   | 2  |
|   |   |  |   | 7  |
|   |   |  |   | 6  |
|   |   |  |   | 2  |
| 1 |   |  |   | 7  |
| 1 |   |  |   | 10 |
|   |   |  |   | 5  |
| 1 |   |  |   | 2  |
|   |   |  |   | 1  |
|   |   |  |   | 9  |
|   |   |  |   | 9  |
|   |   |  |   | 17 |
|   |   |  |   | 4  |
| 1 |   |  |   | 3  |
|   |   |  |   | 6  |
|   |   |  |   | 1  |
|   |   |  |   | 4  |
| 3 |   |  |   | 9  |
| 3 |   |  |   | 3  |
| 3 |   |  |   | 3  |
|   |   |  |   | 1  |
| 3 |   |  |   | 14 |
| 1 |   |  |   | 9  |
|   |   |  |   | 2  |
|   |   |  |   | 11 |
| 3 |   |  |   | 1  |
| 1 |   |  |   | 5  |
| 3 |   |  |   | 7  |
|   |   |  |   | 12 |
| 3 |   |  |   | 5  |
|   |   |  |   | 4  |
|   |   |  |   | 3  |
| 1 |   |  |   | 13 |
| 2 | 1 |  | 1 | 10 |
| 1 |   |  |   | 2  |
|   |   |  |   | 7  |
|   |   |  |   | 2  |



1

2

1

1

3

2

1

2

3

2

1

1

3

3

2

1

1

3

1

3

3

6

12

3

7

7

1

2

2

11

2

2

7

8

12

2

3

7

8

10

3

2

29

4

10

1

3

3

3

6

11

3

4

6

2

8

2

7

2

9

4

4

5

3

13

2

9

|   |   |   |    |
|---|---|---|----|
|   |   |   | 3  |
| 1 |   |   | 7  |
|   |   |   | 8  |
|   |   |   | 3  |
| 2 |   |   | 8  |
|   |   |   | 8  |
|   |   |   | 8  |
|   |   |   | 7  |
|   |   |   | 9  |
|   |   |   | 2  |
|   |   |   | 3  |
| 3 |   |   | 1  |
|   |   |   | 1  |
|   |   |   | 6  |
|   |   |   | 11 |
|   |   |   | 8  |
| 1 |   |   | 3  |
| 1 |   |   | 3  |
|   |   |   | 3  |
| 1 |   |   | 3  |
| 1 |   |   | 6  |
| 1 |   |   | 4  |
|   |   |   | 4  |
|   |   |   | 2  |
| 1 |   |   | 8  |
|   |   |   | 5  |
| 1 |   |   | 4  |
|   |   |   | 3  |
| 2 |   |   | 7  |
|   | 1 | 1 | 6  |
| 3 |   |   | 1  |
|   |   |   | 1  |
| 1 |   |   | 2  |
| 1 |   |   | 4  |
| 3 |   |   | 4  |
|   |   |   | 4  |
| 4 |   |   | 4  |
|   |   |   | 4  |
|   |   |   | 11 |
|   |   |   | 8  |
|   |   |   | 8  |
| 1 |   |   | 6  |
| 3 |   |   | 7  |
| 3 |   |   | 4  |
|   |   |   | 7  |

|   |   |   |    |
|---|---|---|----|
|   |   |   | 1  |
| 1 |   |   | 4  |
| 1 |   |   | 4  |
|   |   |   | 6  |
| 3 | 1 | 1 | 6  |
| 1 | 1 | 1 | 4  |
| 1 |   |   | 8  |
|   |   |   | 2  |
| 1 | 1 | 1 | 7  |
|   |   |   | 9  |
| 2 |   |   | 6  |
| 2 |   |   | 2  |
| 2 |   |   | 8  |
| 1 |   |   | 8  |
| 1 |   |   | 6  |
| 2 |   |   | 5  |
|   |   |   | 9  |
| 1 |   |   | 3  |
|   |   |   | 3  |
| 1 |   |   | 8  |
| 3 |   |   | 13 |
| 3 |   |   | 15 |
|   |   |   | 4  |
|   |   |   | 2  |
| 1 |   |   | 4  |
|   |   |   | 5  |
|   |   |   | 6  |
|   |   |   | 3  |
| 3 |   |   | 2  |
|   |   |   | 3  |
| 1 |   |   | 8  |
| 2 |   |   | 4  |
| 3 |   |   | 7  |
|   |   |   | 5  |
|   |   |   | 6  |
|   |   |   | 2  |
| 3 |   |   | 4  |
|   |   |   | 7  |
| 4 | 1 | 1 | 9  |
| 2 |   |   | 9  |
| 3 |   |   | 10 |
|   |   |   | 5  |
| 2 |   |   | 6  |
| 1 |   |   | 6  |
| 1 |   |   | 11 |
| 2 |   |   | 6  |

1

2

3

3

1

2

3

3

3

1

1

3

1

3

1

4

14

4

7

8

2

4

4

1

4

5

9

5

7

4

7

1

3

6

3

4

4

1

7

4

3

7

5

6

9

6

7

3

12

2

| ISS_Score | ISS_Score | Polytrauma | Verstorben | aufNF | Verstorben | imVerlauf | IBE | Verlauf_IBE |
|-----------|-----------|------------|------------|-------|------------|-----------|-----|-------------|
| 5         |           | 2          | 2          |       | 2          |           | 2   | 1           |
| 2         |           | 2          | 2          |       | 2          |           | 2   | 1           |
| 11        |           | 2          | 2          |       | 2          |           | 2   | 1           |
| 1         |           | 2          | 2          |       | 2          |           | 2   | 1           |
| 8         |           | 2          | 2          |       | 2          |           | 2   | 1           |
| 17        |           | 1          | 2          |       | 2          |           | 2   | 1           |
| 14        |           | 2          | 2          |       | 2          |           | 1   | 1           |
| 1         |           | 2          | 2          |       | 2          |           | 2   | 1           |
| 6         |           | 2          | 2          |       | 2          |           | 2   | 1           |
| 3         |           | 2          | 2          |       | 2          |           | 2   | 1           |
| 3         |           | 2          | 2          |       | 2          |           | 2   | 1           |
| 13        |           | 2          | 2          |       | 2          |           | 2   | 1           |
| 3         |           | 2          | 2          |       | 2          |           | 2   | 1           |
| 2         |           | 2          | 2          |       | 2          |           | 2   | 1           |
| 16        |           | 1          | 2          |       | 2          |           | 1   | 1           |
| 9         |           | 2          | 2          |       | 2          |           | 2   | 1           |
| 6         |           | 2          | 2          |       | 2          |           | 1   | 1           |
| 2         |           | 2          | 2          |       | 2          |           | 2   | 1           |
| 13        |           | 2          | 2          |       | 2          |           | 2   | 1           |
| 5         |           | 2          | 2          |       | 2          |           | 2   | 1           |
| 5         |           | 2          | 2          |       | 2          |           | 2   | 1           |
| 18        |           | 1          | 2          |       | 2          |           | 2   | 1           |
| 1         |           | 2          | 2          |       | 2          |           | 2   | 1           |
| 2         |           | 2          | 2          |       | 2          |           | 2   | 1           |
| 25        |           | 1          | 2          |       | 1          |           | 2   | 1           |
|           |           | 2          | 2          |       | 2          |           | 2   | 1           |
| 11        |           | 2          | 2          |       | 2          |           | 1   | 2           |
| 5         |           | 2          | 2          |       | 2          |           | 2   | 1           |
| 1         |           | 2          | 2          |       | 2          |           | 2   | 1           |
| 13        |           | 2          | 2          |       | 2          |           | 2   | 1           |
| 9         |           | 2          | 2          |       | 2          |           | 2   | 1           |
| 18        |           | 1          | 2          |       | 2          |           | 2   | 1           |
| 4         |           | 2          | 2          |       | 2          |           | 2   | 1           |
| 1         |           | 2          | 2          |       | 2          |           | 2   | 1           |
| 4         |           | 2          | 2          |       | 2          |           | 2   | 1           |
| 1         |           | 2          | 2          |       | 2          |           | 2   | 1           |
| 1         |           | 2          | 2          |       | 2          |           | 2   | 1           |
| 24        |           | 1          | 2          |       | 2          |           | 1   | 1           |
| 9         |           | 2          | 2          |       | 2          |           | 2   | 1           |
| 3         |           | 2          | 2          |       | 2          |           | 2   | 1           |
| 5         |           | 2          | 2          |       | 2          |           | 2   | 1           |
| 4         |           | 2          | 2          |       | 2          |           | 2   | 1           |
| 2         |           | 2          | 2          |       | 2          |           | 2   | 1           |
| 25        |           | 1          | 2          |       | 2          |           | 1   | 1           |
| 9         |           | 2          | 2          |       | 2          |           | 2   | 1           |

|    |     |   |     |
|----|-----|---|-----|
| 2  | 2 2 | 2 | 2 1 |
| 9  | 2 2 | 2 | 1 1 |
| 14 | 2 2 | 2 | 1 1 |
| 2  | 2 2 | 2 | 2 1 |
| 29 | 1 2 | 2 | 2 1 |
| 2  | 2 2 | 2 | 2 1 |
| 2  | 2 2 | 2 | 2 1 |
| 10 | 2 2 | 2 | 1 1 |
| 3  | 2 2 | 2 | 2 1 |
| 14 | 2 2 | 2 | 2 1 |
| 2  | 2 2 | 2 | 2 1 |
| 43 | 1 2 | 2 | 1 1 |
| 4  | 2 2 | 2 | 2 1 |
| 4  | 2 2 | 2 | 2 1 |
| 10 | 2 2 | 2 | 2 1 |
| 2  | 2 2 | 2 | 2 1 |
| 12 | 2 2 | 2 | 1 1 |
| 2  | 2 2 | 2 | 2 1 |
| 13 | 2 2 | 2 | 2 1 |
| 9  | 2 2 | 2 | 1 1 |
| 4  | 2 2 | 2 | 2 1 |
|    | 2 2 | 2 | 2 1 |
| 10 | 2 2 | 2 | 2 1 |
| 13 | 2 2 | 2 | 2 1 |
| 22 | 1 2 | 1 | 2 1 |
| 2  | 2 2 | 2 | 2 1 |
| 1  | 2 2 | 2 | 2 1 |
| 6  | 2 2 | 2 | 2 1 |
| 1  | 2 2 | 2 | 2 1 |
| 22 | 1 2 | 2 | 1 1 |
| 2  | 2 2 | 2 | 2 1 |
| 1  | 2 2 | 2 | 2 1 |
| 4  | 2 2 | 2 | 2 1 |
| 11 | 2 2 | 2 | 2 1 |
| 11 | 2 2 | 2 | 2 1 |
| 13 | 2 2 | 2 | 2 1 |
| 11 | 2 2 | 2 | 2 1 |
| 14 | 2 2 | 2 | 2 1 |
| 2  | 2 2 | 2 | 2 1 |
| 3  | 2 2 | 2 | 2 1 |
| 1  | 2 2 | 2 | 2 1 |
| 1  | 2 2 | 2 | 2 1 |
| 2  | 2 2 | 2 | 2 1 |
| 22 | 1 2 | 2 | 2 1 |
| 43 | 1 2 | 1 | 1 1 |
| 11 | 2 2 | 2 | 2 1 |

|    |     |   |     |
|----|-----|---|-----|
| 10 | 2 2 | 2 | 2 1 |
| 10 | 2 2 | 2 | 2 1 |
| 6  | 2 2 | 2 | 2 1 |
| 14 | 2 2 | 2 | 1 1 |
| 2  | 2 2 | 2 | 2 1 |
| 1  | 2 2 | 2 | 2 1 |
| 6  | 2 2 | 2 | 2 1 |
| 26 | 1 2 | 1 | 2 1 |
| 2  | 2 2 | 2 | 2 1 |
| 2  | 2 2 | 2 | 2 1 |
| 6  | 2 2 | 2 | 2 1 |
| 1  | 2 2 | 2 | 2 1 |
| 2  | 2 2 | 2 | 1 1 |
| 3  | 2 2 | 2 | 2 1 |
| 35 | 1 2 | 2 | 1 1 |
| 2  | 2 2 | 2 | 2 1 |
| 25 | 1 2 | 1 | 1 1 |
| 17 | 1 2 | 2 | 2 1 |
| 22 | 1 2 | 2 | 1 1 |
| 26 | 1 2 | 2 | 1 1 |
| 9  | 2 2 | 2 | 2 1 |
| 2  | 2 2 | 2 | 2 1 |
| 3  | 2 2 | 2 | 2 1 |
| 1  | 2 2 | 2 | 2 1 |
| 4  | 2 2 | 2 | 2 1 |
| 2  | 2 2 | 2 | 2 1 |
| 14 | 2 2 | 2 | 2 1 |
| 9  | 2 2 | 2 | 2 1 |
| 3  | 2 2 | 2 | 2 1 |
| 3  | 2 2 | 2 | 2 1 |
| 4  | 2 2 | 2 | 2 1 |
| 1  | 2 2 | 2 | 2 1 |
| 27 | 1 2 | 2 | 2 1 |
| 6  | 2 2 | 2 | 2 1 |
| 2  | 2 2 | 2 | 2 1 |
| 12 | 2 2 | 2 | 2 1 |
| 19 | 1 2 | 2 | 1 1 |
| 6  | 2 2 | 2 | 2 1 |
| 10 | 2 2 | 2 | 2 1 |
| 2  | 2 2 | 2 | 2 1 |
|    | 2 2 | 2 | 2 1 |
| 3  | 2 2 | 2 | 2 1 |
| 6  | 2 2 | 2 | 2 1 |
| 5  | 2 2 | 2 | 2 1 |
|    | 2 2 | 2 | 2 1 |
| 2  | 2 2 | 1 | 1 1 |

|    |     |   |     |
|----|-----|---|-----|
| 2  | 2 2 | 2 | 2 1 |
| 27 | 1 2 | 2 | 1 1 |
| 2  | 2 2 | 2 | 2 1 |
| 1  | 2 2 | 2 | 2 1 |
| 10 | 2 2 | 2 | 2 1 |
| 1  | 2 2 | 2 | 2 1 |
| 23 | 1 2 | 2 | 1 1 |
| 57 | 1 2 | 2 | 1 1 |
| 2  | 2 2 | 2 | 2 1 |
| 2  | 2 2 | 2 | 2 1 |
| 25 | 1 2 | 2 | 1 1 |
| 2  | 2 2 | 2 | 2 1 |
| 25 | 1 2 | 1 | 1 1 |
| 12 | 2 2 | 2 | 1 1 |
| 25 | 1 2 | 2 | 1 1 |
| 3  | 2 2 | 2 | 2 1 |
| 2  | 2 2 | 2 | 2 1 |
| 9  | 2 2 | 2 | 1 1 |
| 9  | 2 2 | 2 | 2 1 |
| 26 | 1 2 | 2 | 1 1 |
| 5  | 2 2 | 2 | 2 1 |
| 12 | 2 2 | 2 | 2 1 |
| 13 | 2 2 | 2 | 2 1 |
| 17 | 1 2 | 2 | 1 1 |
| 36 | 1 2 | 2 | 1 1 |
| 3  | 2 2 | 2 | 2 1 |
| 20 | 1 2 | 2 | 1 1 |
| 6  | 2 2 | 2 | 2 1 |
| 10 | 2 2 | 2 | 1 1 |
| 13 | 2 2 | 2 | 1 1 |
| 17 | 1 2 | 2 | 2 1 |
| 9  | 2 2 | 2 | 2 1 |
| 14 | 2 2 | 2 | 1 1 |
| 2  | 2 2 | 2 | 2 1 |
| 2  | 2 2 | 2 | 2 1 |
| 14 | 2 2 | 2 | 2 1 |
| 1  | 2 2 | 2 | 2 1 |
| 13 | 2 2 | 2 | 2 1 |
| 5  | 2 2 | 2 | 2 1 |
| 14 | 2 2 | 2 | 2 1 |
| 5  | 2 2 | 2 | 2 1 |
| 3  | 2 2 | 2 | 2 1 |
| 6  | 2 2 | 2 | 2 1 |
| 13 | 2 2 | 2 | 2 1 |
| 17 | 1 2 | 2 | 2 1 |
| 17 | 1 2 | 2 | 2 1 |



|    |     |   |     |
|----|-----|---|-----|
| 9  | 2 2 | 2 | 2 1 |
| 5  | 2 2 | 2 | 2 1 |
| 27 | 1 2 | 2 | 1 1 |
| 2  | 2 2 | 2 | 2 1 |
| 13 | 2 2 | 2 | 2 1 |
| 1  | 2 2 | 2 | 2 1 |
| 14 | 2 2 | 2 | 2 1 |
| 18 | 1 2 | 2 | 1 1 |
| 12 | 2 2 | 2 | 2 1 |
| 11 | 2 2 | 2 | 2 1 |
| 1  | 2 2 | 2 | 2 1 |
| 1  | 2 2 | 2 | 2 1 |
| 6  | 2 2 | 2 | 2 1 |
| 3  | 2 2 | 2 | 2 1 |
| 2  | 2 2 | 2 | 2 1 |
| 2  | 2 2 | 2 | 2 1 |
| 2  | 2 2 | 2 | 2 1 |
| 17 | 1 2 | 2 | 1 1 |
| 8  | 2 2 | 2 | 1 1 |
| 1  | 2 2 | 2 | 2 1 |
| 1  | 2 2 | 2 | 2 1 |
| 3  | 2 2 | 2 | 2 1 |
| 2  | 2 2 | 2 | 2 1 |
| 8  | 2 2 | 2 | 2 1 |
| 5  | 2 2 | 2 | 2 1 |
| 10 | 2 2 | 2 | 2 1 |
| 4  | 2 2 | 2 | 2 1 |
| 6  | 2 2 | 2 | 2 1 |
| 3  | 2 2 | 2 | 2 1 |
| 3  | 2 2 | 2 | 2 1 |
| 6  | 2 2 | 2 | 1 1 |
| 29 | 1 2 | 2 | 1 1 |
| 11 | 2 2 | 2 | 2 1 |
|    | 2 2 | 2 | 2 1 |
| 11 | 2 2 | 2 | 2 1 |
| 5  | 2 2 | 2 | 2 1 |
| 11 | 2 2 | 2 | 2 1 |
| 11 | 2 2 | 2 | 2 1 |
| 4  | 2 2 | 2 | 2 1 |
| 12 | 2 2 | 2 | 2 1 |
| 6  | 2 2 | 2 | 2 1 |
| 10 | 2 2 | 2 | 2 1 |
| 8  | 2 2 | 2 | 2 1 |
| 6  | 2 2 | 2 | 2 1 |
| 12 | 2 2 | 2 | 2 1 |
| 12 | 2 2 | 2 | 2 1 |

|    |     |   |     |
|----|-----|---|-----|
| 14 | 2 2 | 2 | 2 1 |
| 12 | 2 2 | 2 | 1 1 |
| 2  | 2 2 | 2 | 2 1 |
| 3  | 2 2 | 2 | 2 1 |
| 5  | 2 2 | 2 | 2 1 |
| 9  | 2 2 | 2 | 2 1 |
| 6  | 2 2 | 2 | 2 1 |
| 9  | 2 2 | 2 | 2 1 |
| 2  | 2 2 | 2 | 1 1 |
| 17 | 1 2 | 2 | 2 1 |
| 6  | 2 2 | 2 | 2 1 |
| 3  | 2 2 | 2 | 2 1 |
| 17 | 1 2 | 2 | 2 1 |
| 13 | 2 2 | 2 | 2 1 |
| 13 | 2 2 | 2 | 2 1 |
| 17 | 1 2 | 1 | 1 1 |
| 3  | 2 2 | 2 | 2 1 |
| 16 | 2 2 | 2 | 2 1 |
| 2  | 2 2 | 2 | 2 1 |
| 29 | 1 2 | 1 | 1 1 |
| 9  | 2 2 | 2 | 2 1 |
| 12 | 2 2 | 2 | 1 1 |
| 14 | 2 2 | 2 | 2 1 |
| 1  | 2 2 | 2 | 2 1 |
| 4  | 2 2 | 2 | 2 1 |
| 14 | 2 2 | 2 | 1 1 |
| 22 | 1 2 | 2 | 1 1 |
| 9  | 2 2 | 1 | 2 1 |
| 2  | 2 2 | 2 | 2 1 |
| 3  | 2 2 | 2 | 2 1 |
| 9  | 2 2 | 2 | 2 1 |
| 17 | 1 2 | 2 | 1 1 |
| 25 | 1 2 | 2 | 2 1 |
| 6  | 2 2 | 2 | 2 1 |
| 25 | 1 2 | 2 | 2 1 |
| 9  | 2 2 | 2 | 2 1 |
| 3  | 2 2 | 2 | 2 1 |
| 17 | 1 2 | 2 | 2 1 |
| 29 | 1 2 | 2 | 2 1 |
| 6  | 2 2 | 2 | 2 1 |
| 14 | 2 2 | 2 | 2 1 |
| 9  | 2 2 | 1 | 1 1 |
| 3  | 2 2 | 2 | 2 1 |
| 18 | 1 2 | 2 | 1 1 |
|    | 2 2 | 2 | 2 1 |
| 17 | 1 2 | 2 | 1 1 |

|    |     |   |     |
|----|-----|---|-----|
| 22 | 1 2 | 2 | 1 1 |
| 43 | 1 2 | 1 | 1 1 |
| 2  | 2 2 | 2 | 2 1 |
| 2  | 2 2 | 2 | 2 1 |
| 10 | 2 2 | 2 | 1 1 |
| 26 | 1 2 | 2 | 1 1 |
| 12 | 2 2 | 2 | 2 1 |
| 6  | 2 2 | 2 | 2 1 |
| 17 | 1 2 | 2 | 1 1 |
| 17 | 1 2 | 2 | 2 1 |
| 11 | 2 2 | 2 | 2 1 |
| 4  | 2 2 | 2 | 2 1 |
| 42 | 1 2 | 2 | 1 1 |
| 8  | 2 2 | 2 | 2 1 |
| 9  | 2 2 | 2 | 2 1 |
| 14 | 2 2 | 2 | 1 1 |
| 1  | 2 2 | 2 | 2 1 |
| 24 | 1 2 | 2 | 1 1 |
| 17 | 1 2 | 2 | 1 1 |
| 10 | 2 2 | 2 | 2 1 |
| 2  | 2 2 | 2 | 2 1 |
| 1  | 2 2 | 2 | 2 1 |
| 16 | 1 2 | 2 | 1 1 |
| 11 | 2 2 | 2 | 2 1 |
| 57 | 1 2 | 2 | 1 1 |
| 4  | 2 2 | 2 | 2 1 |
| 5  | 2 2 | 2 | 2 1 |
| 9  | 2 2 | 2 | 1 1 |
| 6  | 2 2 | 2 | 1 1 |
| 5  | 2 2 | 2 | 2 1 |
| 10 | 2 2 | 2 | 1 1 |
| 17 | 1 2 | 2 | 2 1 |
| 9  | 2 2 | 2 | 1 1 |
| 14 | 2 2 | 2 | 2 1 |
| 13 | 2 2 | 2 | 1 1 |
| 2  | 2 2 | 2 | 2 1 |
| 17 | 1 2 | 2 | 1 1 |
| 3  | 2 2 | 2 | 2 1 |
| 22 | 1 2 | 2 | 1 1 |
| 17 | 1 2 | 2 | 1 1 |
| 38 | 1 2 | 2 | 1 1 |
| 17 | 1 2 | 2 | 1 1 |
| 6  | 2 2 | 2 | 2 1 |
| 11 | 2 2 | 2 | 2 1 |
| 2  | 2 2 | 2 | 2 1 |
| 9  | 2 2 | 2 | 2 1 |

|    |     |   |     |
|----|-----|---|-----|
| 9  | 2 2 | 2 | 1 1 |
| 6  | 2 2 | 2 | 2 1 |
| 10 | 2 2 | 2 | 2 1 |
| 4  | 2 2 | 2 | 1 1 |
| 9  | 2 2 | 2 | 2 1 |
| 14 | 2 2 | 2 | 2 1 |
| 2  | 2 2 | 2 | 2 1 |
| 14 | 2 2 | 2 | 1 1 |
| 45 | 1 2 | 2 | 1 1 |
| 8  | 2 2 | 2 | 2 1 |
| 1  | 2 2 | 2 | 2 1 |
| 4  | 2 2 | 2 | 2 1 |
| 36 | 1 2 | 2 | 1 1 |
| 8  | 2 2 | 2 | 2 1 |
| 5  | 2 2 | 2 | 2 1 |
| 4  | 2 2 | 2 | 2 1 |
| 8  | 2 2 | 2 | 1 1 |
| 35 | 1 2 | 2 | 2 1 |
| 11 | 2 2 | 2 | 2 1 |
| 17 | 1 2 | 2 | 1 1 |
| 2  | 2 2 | 2 | 2 1 |
| 22 | 1 2 | 2 | 1 1 |
| 5  | 2 2 | 2 | 2 1 |
| 17 | 1 2 | 2 | 1 1 |
| 17 | 1 2 | 2 | 2 1 |
| 5  | 2 2 | 2 | 2 1 |
| 4  | 2 2 | 2 | 2 1 |
| 17 | 1 2 | 2 | 2 1 |
| 33 | 1 2 | 2 | 1 1 |
| 2  | 2 2 | 2 | 2 1 |
| 3  | 2 2 | 2 | 2 1 |
| 11 | 2 2 | 2 | 2 1 |
| 9  | 2 2 | 2 | 2 1 |
| 5  | 2 2 | 2 | 2 1 |
| 22 | 1 2 | 2 | 1 1 |
| 10 | 2 2 | 2 | 1 1 |
| 11 | 2 2 | 2 | 2 1 |
| 2  | 2 2 | 2 | 2 1 |
| 3  | 2 2 | 2 | 2 1 |
| 45 | 1 2 | 1 | 1 1 |
| 14 | 2 2 | 2 | 2 1 |
| 11 | 2 2 | 2 | 1 1 |
| 29 | 1 2 | 2 | 1 1 |
| 1  | 2 2 | 2 | 2 1 |
| 11 | 2 2 | 2 | 2 1 |
| 1  | 2 2 | 2 | 2 1 |

|    |     |   |     |
|----|-----|---|-----|
| 43 | 1 2 | 2 | 1 1 |
| 13 | 2 2 | 2 | 2 1 |
| 5  | 2 2 | 2 | 1 1 |
| 3  | 2 2 | 2 | 2 1 |
| 2  | 2 2 | 2 | 2 1 |
| 2  | 2 2 | 2 | 2 1 |
| 1  | 2 2 | 2 | 2 1 |
| 11 | 2 2 | 2 | 1 1 |
| 3  | 2 2 | 2 | 2 1 |
| 3  | 2 2 | 2 | 2 1 |
| 1  | 2 2 | 2 | 2 1 |
| 6  | 2 2 | 2 | 2 1 |
| 11 | 2 2 | 2 | 2 1 |
| 10 | 2 2 | 2 | 2 1 |
| 16 | 1 2 | 2 | 1 1 |
| 16 | 1 2 | 2 | 1 1 |
| 1  | 2 2 | 2 | 2 1 |
| 6  | 2 2 | 2 | 2 1 |
| 3  | 2 2 | 2 | 2 1 |
| 6  | 2 2 | 2 | 2 1 |
| 25 | 1 2 | 1 | 2 1 |
| 10 | 2 2 | 2 | 2 1 |
| 9  | 2 2 | 2 | 2 1 |
| 17 | 1 2 | 2 | 1 1 |
| 14 | 2 2 | 2 | 1 1 |
| 2  | 2 2 | 2 | 2 1 |
| 1  | 2 2 | 2 | 2 1 |
| 2  | 2 2 | 2 | 2 1 |
| 26 | 1 2 | 1 | 1 1 |
| 25 | 1 2 | 2 | 2 1 |
| 3  | 2 2 | 2 | 2 1 |
| 11 | 2 2 | 2 | 2 1 |
| 3  | 2 2 | 2 | 2 1 |
| 9  | 2 2 | 2 | 2 1 |
| 3  | 2 2 | 2 | 2 1 |
| 9  | 2 2 | 2 | 1 1 |
| 11 | 2 2 | 2 | 2 1 |
| 3  | 2 2 | 2 | 2 1 |
| 3  | 2 2 | 2 | 2 1 |
| 13 | 2 2 | 2 | 1 1 |
| 14 | 2 2 | 2 | 2 1 |
| 1  | 2 2 | 2 | 2 1 |
| 8  | 2 2 | 2 | 2 1 |
| 2  | 2 2 | 2 | 2 1 |
| 11 | 2 2 | 2 | 2 1 |
| 2  | 2 2 | 2 | 2 1 |

|    |     |   |     |
|----|-----|---|-----|
| 9  | 2 2 | 2 | 2 1 |
| 24 | 1 2 | 2 | 1 1 |
| 3  | 2 2 | 2 | 2 1 |
| 38 | 1 2 | 2 | 1 1 |
| 3  | 2 2 | 2 | 2 1 |
| 14 | 2 2 | 2 | 2 1 |
| 5  | 2 2 | 2 | 2 1 |
| 14 | 2 2 | 2 | 2 1 |
| 6  | 2 2 | 2 | 2 1 |
| 5  | 2 2 | 2 | 2 1 |
| 11 | 2 2 | 2 | 2 1 |
| 13 | 2 2 | 2 | 2 1 |
| 24 | 1 2 | 2 | 1 1 |
| 2  | 2 2 | 2 | 2 1 |
| 2  | 2 2 | 2 | 2 1 |
| 12 | 2 2 | 2 | 2 1 |
| 6  | 2 2 | 2 | 2 1 |
| 10 | 2 2 | 2 | 2 1 |
| 1  | 2 2 | 2 | 2 1 |
| 22 | 1 2 | 2 | 2 1 |
| 9  | 2 2 | 2 | 1 1 |
| 2  | 2 2 | 2 | 2 1 |
| 2  | 2 2 | 2 | 2 1 |
| 2  | 2 2 | 2 | 2 1 |
| 22 | 1 2 | 2 | 2 1 |
| 13 | 2 2 | 2 | 1 1 |
| 5  | 2 2 | 2 | 2 1 |
| 11 | 2 2 | 2 | 2 1 |
| 1  | 2 2 | 2 | 2 1 |
| 18 | 1 2 | 2 | 1 1 |
| 22 | 1 2 | 2 | 2 1 |
| 2  | 2 2 | 2 | 2 1 |
| 17 | 1 2 | 2 | 1 1 |
| 11 | 2 2 | 2 | 2 1 |
| 13 | 2 2 | 2 | 2 1 |
| 10 | 2 2 | 2 | 1 1 |
| 6  | 2 2 | 2 | 2 1 |
| 6  | 2 2 | 2 | 2 1 |
| 9  | 2 2 | 2 | 2 1 |
| 2  | 2 2 | 2 | 2 1 |
| 38 | 1 2 | 1 | 1 1 |
| 10 | 2 2 | 2 | 1 1 |
| 3  | 2 2 | 2 | 2 1 |
| 2  | 2 2 | 2 | 2 1 |
| 5  | 2 2 | 2 | 2 1 |
| 11 | 2 2 | 2 | 2 1 |

|    |     |   |     |
|----|-----|---|-----|
| 6  | 2 2 | 2 | 2 1 |
| 29 | 1 2 | 1 | 1 1 |
| 17 | 1 2 | 2 | 1 1 |
| 14 | 2 2 | 2 | 2 1 |
| 14 | 2 2 | 2 | 1 1 |
| 9  | 2 2 | 2 | 1 1 |
| 13 | 2 2 | 2 | 2 1 |
| 3  | 2 2 | 2 | 2 1 |
| 6  | 2 2 | 2 | 2 1 |
| 5  | 2 2 | 2 | 1 1 |
| 6  | 2 2 | 2 | 2 1 |
| 29 | 1 2 | 2 | 2 1 |
| 6  | 2 2 | 2 | 2 1 |
| 9  | 2 2 | 2 | 2 1 |
| 18 | 1 2 | 2 | 1 1 |
| 10 | 2 2 | 2 | 2 1 |
| 13 | 2 2 | 2 | 1 1 |
| 25 | 1 2 | 1 | 1 1 |
| 10 | 2 2 | 2 | 2 1 |
| 10 | 2 2 | 1 | 2 1 |
| 5  | 2 2 | 2 | 2 1 |
| 18 | 1 2 | 2 | 2 1 |
| 2  | 2 2 | 2 | 2 1 |
|    | 2 2 | 2 | 1 1 |
| 17 | 1 2 | 2 | 1 1 |
| 9  | 2 2 | 2 | 1 1 |
| 3  | 2 2 | 2 | 2 1 |
| 2  | 2 2 | 2 | 2 1 |
| 10 | 2 2 | 2 | 1 1 |
| 26 | 1 2 | 1 | 1 1 |
| 14 | 2 2 | 2 | 1 1 |
| 34 | 1 2 | 2 | 1 1 |
| 2  | 2 2 | 2 | 2 1 |
| 17 | 1 2 | 2 | 2 1 |
| 14 | 2 2 | 2 | 2 1 |
| 19 | 1 2 | 2 | 2 1 |
| 9  | 2 2 | 2 | 2 1 |
| 5  | 2 2 | 2 | 1 1 |
| 2  | 2 2 | 2 | 2 1 |
|    | 2 1 | 1 | 1 1 |
| 19 | 1 2 | 2 | 2 1 |
| 2  | 2 2 | 2 | 2 1 |
| 34 | 1 2 | 2 | 2 1 |
| 17 | 1 2 | 2 | 2 1 |
| 6  | 2 2 | 2 | 2 1 |
| 22 | 1 2 | 2 | 1 1 |

|    |     |   |     |
|----|-----|---|-----|
| 14 | 2 2 | 2 | 2 1 |
| 1  | 2 2 | 2 | 2 1 |
| 11 | 2 2 | 2 | 1 1 |
| 17 | 1 2 | 2 | 1 1 |
| 6  | 2 2 | 2 | 2 1 |
| 6  | 2 2 | 2 | 2 1 |
| 75 | 1 2 | 1 | 1 1 |
| 6  | 2 2 | 2 | 2 1 |
| 14 | 2 2 | 2 | 1 1 |
| 43 | 1 2 | 1 | 1 1 |
| 33 | 1 2 | 1 | 1 1 |
| 10 | 2 2 | 2 | 1 1 |
| 2  | 2 2 | 2 | 2 1 |
| 22 | 1 2 | 2 | 1 1 |
| 3  | 2 2 | 2 | 2 1 |
| 20 | 1 2 | 1 | 1 1 |
| 34 | 1 2 | 2 | 1 1 |
| 18 | 1 2 | 2 | 2 1 |
| 4  | 2 2 | 2 | 1 1 |
| 2  | 2 2 | 2 | 2 1 |
| 2  | 2 2 | 2 | 1 1 |
| 20 | 1 2 | 2 | 2 1 |
| 5  | 2 2 | 2 | 2 1 |
|    | 2 2 | 2 | 2 1 |
| 4  | 2 2 | 2 | 1 1 |
| 9  | 2 2 | 2 | 1 1 |
| 9  | 2 2 | 2 | 2 1 |
| 1  | 2 2 | 2 | 2 1 |
| 5  | 2 2 | 2 | 2 1 |
| 3  | 2 2 | 2 | 2 1 |
| 2  | 2 2 | 2 | 1 1 |
| 14 | 2 2 | 2 | 1 1 |
| 26 | 1 2 | 2 | 2 1 |
| 25 | 1 2 | 2 | 1 1 |
| 9  | 2 2 | 2 | 1 1 |
| 10 | 2 2 | 2 | 2 1 |
| 6  | 2 2 | 2 | 2 1 |
| 4  | 2 2 | 2 | 2 1 |
| 9  | 2 2 | 2 | 2 1 |
| 5  | 2 2 | 2 | 2 1 |
| 4  | 2 2 | 2 | 2 1 |
| 2  | 2 2 | 2 | 2 1 |
| 6  | 2 2 | 2 | 2 1 |
| 9  | 2 2 | 2 | 2 1 |
| 3  | 2 2 | 2 | 1 1 |
| 13 | 2 2 | 2 | 1 1 |



|    |     |   |     |
|----|-----|---|-----|
| 2  | 2 2 | 2 | 2 1 |
| 29 | 1 2 | 2 | 1 1 |
| 26 | 1 2 | 1 | 1 1 |
| 1  | 2 2 | 2 | 2 1 |
| 10 | 2 2 | 2 | 2 1 |
| 3  | 2 2 | 2 | 2 1 |
| 2  | 2 2 | 2 | 2 1 |
| 4  | 2 2 | 2 | 2 1 |
| 4  | 2 2 | 2 | 1 1 |
| 10 | 2 2 | 2 | 2 1 |
| 4  | 2 2 | 2 | 1 1 |
| 9  | 2 2 | 2 | 2 1 |
| 2  | 2 2 | 2 | 2 1 |
| 1  | 2 2 | 2 | 2 1 |
| 5  | 2 2 | 2 | 2 1 |
| 2  | 2 2 | 2 | 2 1 |
| 4  | 2 2 | 2 | 2 1 |
| 34 | 1 2 | 2 | 2 1 |
| 6  | 2 2 | 2 | 2 1 |
| 3  | 2 2 | 2 | 1 1 |
| 1  | 2 2 | 2 | 2 1 |
| 1  | 2 2 | 2 | 2 1 |
| 3  | 2 2 | 2 | 2 1 |
|    | 2 2 | 2 | 1 1 |
| 5  | 2 2 | 2 | 2 1 |
| 5  | 2 2 | 2 | 2 1 |
| 2  | 2 2 | 2 | 2 1 |
| 17 | 1 2 | 2 | 2 1 |
| 17 | 1 2 | 2 | 1 1 |
| 3  | 2 2 | 2 | 2 1 |
| 10 | 2 2 | 2 | 2 1 |
| 10 | 2 2 | 2 | 2 1 |
| 6  | 2 2 | 2 | 2 1 |
| 22 | 1 2 | 2 | 2 1 |
| 12 | 2 2 | 2 | 1 1 |
| 8  | 2 2 | 2 | 1 1 |
| 9  | 2 2 | 2 | 2 1 |
| 30 | 1 2 | 2 | 1 1 |
| 16 | 2 2 | 2 | 1 1 |
| 24 | 1 2 | 2 | 1 1 |
| 13 | 2 2 | 2 | 2 1 |
| 5  | 2 2 | 2 | 2 1 |
| 5  | 2 2 | 2 | 2 1 |
| 6  | 2 2 | 2 | 2 1 |
| 22 | 1 2 | 2 | 1 1 |
| 10 | 2 2 | 2 | 2 1 |

|    |     |   |     |
|----|-----|---|-----|
| 33 | 1 2 | 2 | 1 1 |
| 17 | 1 2 | 2 | 1 1 |
| 29 | 1 2 | 1 | 2 1 |
| 16 | 2 2 | 2 | 1 1 |
| 14 | 2 2 | 2 | 2 1 |
| 10 | 2 2 | 2 | 2 1 |
| 3  | 2 2 | 2 | 2 1 |
| 9  | 2 2 | 2 | 2 1 |
| 33 | 1 2 | 2 | 2 1 |
| 9  | 2 2 | 2 | 1 1 |
| 11 | 2 2 | 2 | 2 1 |
| 10 | 2 2 | 2 | 2 1 |
| 17 | 1 2 | 2 | 2 1 |
| 2  | 2 2 | 2 | 2 1 |
| 13 | 2 2 | 2 | 2 1 |
| 14 | 2 2 | 2 | 1 1 |
| 9  | 2 2 | 2 | 2 1 |
| 2  | 2 2 | 2 | 2 1 |
| 4  | 2 2 | 2 | 2 1 |
| 43 | 1 2 | 2 | 1 1 |
| 14 | 2 2 | 2 | 2 1 |
| 6  | 2 2 | 2 | 2 1 |
| 14 | 2 2 | 2 | 2 1 |
| 22 | 1 2 | 2 | 1 1 |
| 2  | 2 2 | 2 | 2 1 |
| 2  | 2 2 | 2 | 2 1 |
| 2  | 2 2 | 2 | 2 1 |
| 10 | 2 2 | 2 | 1 1 |
| 3  | 2 2 | 2 | 2 1 |
| 9  | 2 2 | 2 | 2 1 |
| 1  | 2 2 | 2 | 2 1 |
| 5  | 2 2 | 2 | 2 1 |
| 17 | 1 2 | 2 | 2 1 |
| 6  | 2 2 | 2 | 2 1 |
| 13 | 2 2 | 2 | 1 1 |
| 6  | 2 2 | 2 | 2 1 |
| 14 | 2 2 | 2 | 2 1 |
| 21 | 1 2 | 2 | 1 1 |
| 3  | 2 2 | 2 | 2 1 |
| 12 | 2 2 | 2 | 2 1 |
| 22 | 1 2 | 2 | 1 1 |
| 41 | 1 2 | 2 | 1 1 |
| 8  | 2 2 | 2 | 1 1 |
| 3  | 2 2 | 2 | 2 1 |
| 11 | 2 2 | 2 | 1 1 |
| 5  | 2 2 | 2 | 2 1 |

|    |     |   |     |
|----|-----|---|-----|
| 3  | 2 2 | 2 | 2 1 |
| 21 | 1 2 | 2 | 1 1 |
| 2  | 2 2 | 2 | 2 1 |
| 14 | 2 2 | 2 | 1 1 |
| 5  | 2 2 | 2 | 2 1 |
| 10 | 2 2 | 2 | 2 1 |
| 2  | 2 2 | 2 | 2 1 |
| 5  | 2 2 | 2 | 2 1 |
| 1  | 2 2 | 2 | 2 1 |
| 13 | 2 2 | 2 | 1 1 |
| 29 | 1 2 | 2 | 1 1 |
| 3  | 2 2 | 2 | 2 1 |
| 22 | 1 2 | 2 | 1 1 |
| 6  | 2 2 | 2 | 2 1 |
| 12 | 2 2 | 2 | 2 1 |
| 9  | 2 2 | 2 | 2 1 |
| 50 | 1 1 | 2 | 2 1 |
| 3  | 2 2 | 2 | 2 1 |
| 14 | 2 2 | 2 | 1 1 |
| 16 | 2 2 | 2 | 2 1 |
| 19 | 1 2 | 2 | 2 1 |
| 9  | 2 2 | 2 | 2 1 |
| 9  | 2 2 | 2 | 2 1 |
| 2  | 2 2 | 2 | 2 1 |
| 3  | 2 2 | 2 | 2 1 |
| 25 | 1 2 | 2 | 1 1 |
| 16 | 2 2 | 2 | 2 1 |
| 26 | 1 2 | 2 | 1 1 |
| 14 | 2 2 | 2 | 1 1 |
| 2  | 2 2 | 2 | 2 1 |
| 10 | 2 2 | 2 | 2 1 |
| 25 | 1 2 | 2 | 1 1 |
| 3  | 2 2 | 2 | 2 1 |
| 18 | 1 2 | 2 | 1 1 |
| 8  | 2 2 | 2 | 2 1 |
| 22 | 1 2 | 2 | 1 1 |
| 29 | 1 2 | 2 | 1 1 |
| 30 | 1 2 | 1 | 2 1 |
| 4  | 2 2 | 2 | 2 1 |
| 33 | 1 2 | 2 | 1 1 |
| 19 | 1 2 | 2 | 2 1 |
| 10 | 2 2 | 2 | 1 1 |
| 2  | 2 2 | 2 | 2 1 |
| 16 | 2 2 | 2 | 2 1 |
| 14 | 2 2 | 2 | 2 1 |
| 3  | 2 2 | 2 | 2 1 |

|    |     |   |     |
|----|-----|---|-----|
| 5  | 2 2 | 2 | 2 1 |
| 2  | 2 2 | 2 | 2 1 |
| 13 | 2 2 | 2 | 1 1 |
| 4  | 2 2 | 2 | 2 1 |
| 29 | 1 2 | 2 | 1 1 |
| 14 | 2 2 | 2 | 2 1 |
| 5  | 2 2 | 2 | 2 1 |
| 10 | 2 2 | 2 | 2 1 |
| 14 | 2 2 | 2 | 2 1 |
| 14 | 2 2 | 2 | 1 1 |
| 14 | 2 2 | 2 | 1 1 |
| 16 | 2 2 | 2 | 2 1 |
| 14 | 2 2 | 2 | 2 1 |
| 5  | 2 2 | 2 | 1 1 |
| 4  | 2 2 | 2 | 2 1 |
| 4  | 2 2 | 2 | 2 1 |
| 3  | 2 2 | 2 | 2 1 |
| 34 | 1 2 | 2 | 1 1 |
| 24 | 1 2 | 2 | 1 1 |
| 6  | 2 2 | 2 | 1 1 |
| 3  | 2 2 | 2 | 2 1 |
| 45 | 1 2 | 1 | 2 1 |
| 1  | 2 2 | 2 | 2 1 |
| 9  | 2 2 | 2 | 2 1 |
| 17 | 1 2 | 2 | 1 1 |
| 6  | 2 2 | 2 | 2 1 |
| 10 | 2 2 | 2 | 1 1 |
| 17 | 1 2 | 2 | 2 1 |
| 34 | 1 2 | 2 | 1 1 |
| 3  | 2 2 | 2 | 2 1 |
| 2  | 2 2 | 2 | 2 1 |
| 9  | 2 2 | 2 | 2 1 |
| 29 | 1 2 | 2 | 1 1 |
| 2  | 2 2 | 2 | 2 1 |
| 10 | 2 2 | 2 | 2 1 |
| 29 | 1 2 | 2 | 2 1 |
| 14 | 2 2 | 2 | 2 1 |
| 3  | 2 2 | 2 | 2 1 |
| 3  | 2 2 | 2 | 2 1 |
| 3  | 2 2 | 2 | 2 1 |
| 14 | 2 2 | 2 | 1 1 |
| 9  | 2 2 | 2 | 2 1 |
| 5  | 2 2 | 2 | 2 1 |
| 24 | 1 2 | 2 | 1 1 |
| 34 | 1 2 | 2 | 1 1 |
| 6  | 2 2 | 2 | 1 1 |

|    |     |   |     |
|----|-----|---|-----|
| 22 | 1 2 | 2 | 1 1 |
| 3  | 2 2 | 2 | 2 1 |
| 13 | 2 2 | 2 | 2 1 |
| 10 | 2 2 | 1 | 1 1 |
| 5  | 2 2 | 2 | 2 1 |
| 18 | 1 2 | 2 | 1 1 |
| 2  | 2 2 | 2 | 2 1 |
| 22 | 1 2 | 2 | 1 1 |
| 21 | 1 2 | 2 | 1 1 |
| 12 | 2 2 | 2 | 2 1 |
| 5  | 2 2 | 2 | 2 1 |
| 27 | 1 2 | 2 | 1 1 |
| 5  | 2 2 | 2 | 2 1 |
| 13 | 2 2 | 2 | 1 1 |
| 4  | 2 2 | 2 | 2 1 |
| 8  | 2 2 | 2 | 2 1 |
| 14 | 2 2 | 1 | 1 1 |
| 14 | 2 2 | 2 | 1 1 |
| 5  | 2 2 | 2 | 2 1 |
| 14 | 2 2 | 2 | 2 1 |
| 9  | 2 2 | 2 | 2 1 |
| 4  | 2 2 | 2 | 1 1 |
| 5  | 2 2 | 2 | 2 1 |
| 17 | 1 2 | 2 | 1 1 |
| 11 | 2 2 | 2 | 2 1 |
| 6  | 2 2 | 2 | 2 1 |
| 11 | 2 2 | 2 | 1 1 |
| 10 | 2 2 | 2 | 1 1 |
| 2  | 2 2 | 2 | 2 1 |
| 18 | 1 2 | 2 | 2 1 |
| 29 | 1 2 | 2 | 1 1 |
| 6  | 2 2 | 2 | 2 1 |
| 17 | 1 2 | 2 | 1 1 |
| 9  | 2 2 | 2 | 2 1 |
| 10 | 2 2 | 2 | 2 1 |
| 2  | 2 2 | 2 | 2 1 |
| 5  | 2 2 | 2 | 2 1 |
| 9  | 2 2 | 2 | 2 1 |
| 29 | 1 2 | 2 | 2 1 |
| 2  | 2 2 | 2 | 2 1 |
| 5  | 2 2 | 2 | 2 1 |
| 5  | 2 2 | 2 | 2 1 |
| 2  | 2 2 | 2 | 2 1 |
| 24 | 1 2 | 2 | 2 1 |
| 17 | 1 2 | 2 | 2 1 |
| 34 | 1 2 | 1 | 1 1 |

|    |     |   |     |
|----|-----|---|-----|
| 9  | 2 2 | 2 | 1 1 |
| 5  | 2 2 | 2 | 2 1 |
| 13 | 2 2 | 2 | 2 1 |
| 22 | 1 2 | 2 | 1 1 |
| 6  | 2 2 | 2 | 2 1 |
| 4  | 2 2 | 2 | 2 1 |
| 8  | 2 2 | 2 | 2 1 |
| 14 | 2 2 | 1 | 1 1 |
| 30 | 1 2 | 1 | 2 1 |
| 25 | 1 2 | 1 | 2 1 |
| 16 | 1 2 | 2 | 1 1 |
| 3  | 2 2 | 2 | 2 1 |
| 14 | 2 2 | 2 | 1 1 |
| 22 | 1 2 | 2 | 1 1 |
| 3  | 2 2 | 2 | 2 1 |
| 34 | 1 2 | 2 | 2 1 |
| 21 | 1 2 | 2 | 2 1 |
| 13 | 2 2 | 2 | 1 1 |
| 19 | 1 2 | 2 | 1 1 |
| 6  | 2 2 | 2 | 2 1 |
| 20 | 1 2 | 2 | 1 1 |
| 6  | 2 2 | 2 | 2 1 |
| 2  | 2 2 | 2 | 2 1 |
| 14 | 2 2 | 2 | 1 1 |
| 9  | 2 2 | 2 | 1 1 |
| 5  | 2 2 | 2 | 2 1 |
| 11 | 2 2 | 2 | 2 1 |
| 9  | 2 2 | 2 | 2 1 |
| 9  | 2 2 | 2 | 2 1 |
| 17 | 1 2 | 1 | 1 1 |
| 10 | 2 2 | 2 | 2 1 |
| 9  | 2 2 | 2 | 1 1 |
| 29 | 1 2 | 2 | 1 1 |
| 21 | 1 2 | 2 | 1 1 |
| 18 | 1 2 | 2 | 2 1 |
| 9  | 2 2 | 1 | 1 1 |
| 21 | 1 2 | 2 | 1 1 |
| 1  | 2 2 | 2 | 2 1 |
| 18 | 1 2 | 2 | 1 1 |
| 5  | 2 2 | 2 | 2 1 |
| 34 | 1 2 | 1 | 1 1 |
| 17 | 1 2 | 2 | 1 1 |
| 25 | 1 2 | 1 | 2 1 |
| 8  | 2 2 | 2 | 2 1 |
| 26 | 1 2 | 1 | 1 1 |
| 9  | 2 2 | 2 | 1 1 |

|    |     |   |     |
|----|-----|---|-----|
| 24 | 1 2 | 2 | 1 1 |
| 9  | 2 2 | 2 | 1 1 |
| 6  | 2 2 | 2 | 2 1 |
| 1  | 2 2 | 2 | 2 1 |
| 27 | 1 2 | 2 | 1 1 |
| 17 | 1 2 | 2 | 2 1 |
| 13 | 2 2 | 2 | 1 1 |
| 29 | 1 2 | 2 | 2 1 |
| 14 | 2 2 | 2 | 1 1 |
| 5  | 2 2 | 2 | 1 1 |
| 11 | 2 2 | 2 | 1 1 |
| 2  | 2 2 | 2 | 2 1 |
| 26 | 1 2 | 1 | 2 1 |
| 6  | 2 2 | 2 | 2 1 |
| 1  | 2 2 | 2 | 2 1 |
| 33 | 1 2 | 1 | 1 1 |
| 10 | 2 2 | 2 | 2 1 |
| 1  | 2 2 | 2 | 2 1 |
| 13 | 2 2 | 2 | 2 1 |
| 19 | 1 2 | 2 | 2 1 |
| 6  | 2 2 | 2 | 2 1 |
| 17 | 1 2 | 2 | 2 1 |
| 6  | 2 2 | 2 | 2 1 |
| 21 | 1 2 | 2 | 1 1 |
| 29 | 1 2 | 2 | 1 1 |
| 9  | 2 2 | 2 | 2 1 |
|    | 2 2 | 2 | 1 1 |
| 66 | 1 2 | 1 | 2 1 |
| 33 | 1 2 | 2 | 1 1 |
| 22 | 1 2 | 2 | 1 1 |
| 20 | 1 2 | 2 | 1 1 |
| 16 | 2 2 | 2 | 2 1 |
| 57 | 1 2 | 1 | 2 1 |
| 22 | 1 2 | 2 | 1 1 |
| 11 | 2 2 | 2 | 2 1 |
| 35 | 1 2 | 1 | 1 1 |
| 24 | 1 2 | 2 | 1 1 |
| 11 | 2 2 | 2 | 2 1 |
| 14 | 2 2 | 2 | 1 1 |
| 14 | 2 2 | 2 | 2 1 |
| 2  | 2 2 | 2 | 2 1 |
| 14 | 2 2 | 2 | 2 1 |
| 17 | 1 2 | 2 | 2 1 |
| 9  | 2 2 | 2 | 2 1 |
| 9  | 2 2 | 2 | 2 1 |
| 14 | 2 2 | 2 | 2 1 |

|    |     |   |     |
|----|-----|---|-----|
| 12 | 2 2 | 2 | 1 1 |
| 25 | 1 2 | 2 | 1 1 |
| 22 | 1 2 | 2 | 1 1 |
| 8  | 2 2 | 2 | 2 1 |
| 3  | 2 2 | 2 | 2 1 |
| 30 | 1 2 | 2 | 1 1 |
| 2  | 2 2 | 2 | 2 1 |
| 33 | 1 2 | 2 | 2 1 |
| 42 | 1 2 | 1 | 1 1 |
| 9  | 2 2 | 2 | 2 1 |
| 8  | 2 2 | 2 | 1 1 |
| 9  | 2 2 | 2 | 1 1 |
| 9  | 2 1 | 2 | 2 1 |
| 17 | 1 2 | 2 | 1 1 |
| 14 | 2 2 | 2 | 2 1 |
| 29 | 1 2 | 2 | 2 1 |
| 33 | 1 2 | 2 | 1 1 |
| 22 | 1 2 | 2 | 1 1 |
| 10 | 2 2 | 2 | 2 1 |
| 2  | 2 2 | 2 | 2 1 |
| 17 | 1 2 | 2 | 1 1 |
| 13 | 2 2 | 2 | 1 1 |
| 3  | 2 2 | 2 | 2 1 |
| 18 | 1 2 | 2 | 2 1 |
| 19 | 1 2 | 2 | 1 1 |
| 8  | 2 2 | 2 | 2 1 |
| 13 | 2 2 | 2 | 1 1 |
| 35 | 1 2 | 2 | 1 1 |
| 9  | 2 2 | 2 | 2 1 |
| 2  | 2 2 | 2 | 2 1 |
| 29 | 1 2 | 2 | 1 1 |
| 14 | 2 2 | 2 | 2 1 |
| 5  | 2 2 | 2 | 2 1 |
| 5  | 2 2 | 2 | 1 1 |
| 10 | 2 2 | 2 | 2 1 |
| 24 | 1 2 | 2 | 1 1 |
| 29 | 1 2 | 1 | 2 1 |
| 17 | 1 2 | 2 | 1 1 |
| 3  | 2 2 | 2 | 2 1 |
| 22 | 1 2 | 2 | 2 1 |
| 12 | 2 2 | 2 | 1 1 |
| 2  | 2 2 | 2 | 2 1 |
| 17 | 1 2 | 2 | 2 1 |
| 3  | 2 2 | 2 | 2 1 |
| 4  | 2 2 | 2 | 2 1 |
| 17 | 1 2 | 2 | 1 1 |



|    |     |   |     |
|----|-----|---|-----|
| 9  | 2 2 | 2 | 2 1 |
| 22 | 1 2 | 2 | 1 1 |
| 17 | 1 2 | 2 | 1 1 |
| 6  | 2 2 | 2 | 2 1 |
| 24 | 1 2 | 2 | 2 1 |
| 19 | 1 2 | 2 | 2 1 |
| 9  | 2 2 | 2 | 2 1 |
| 19 | 1 2 | 2 | 2 1 |
| 2  | 2 2 | 2 | 2 1 |
| 38 | 1 2 | 1 | 2 1 |
| 1  | 2 2 | 2 | 2 1 |
| 5  | 2 2 | 2 | 1 1 |
| 35 | 1 2 | 2 | 2 1 |
| 9  | 2 2 | 2 | 2 1 |
| 3  | 2 2 | 2 | 2 1 |
| 11 | 2 2 | 2 | 2 1 |
| 10 | 2 2 | 2 | 2 1 |
| 2  | 2 2 | 2 | 2 1 |
| 9  | 2 2 | 2 | 2 1 |
| 6  | 2 2 | 2 | 2 1 |
| 12 | 2 2 | 2 | 2 1 |
| 10 | 2 2 | 2 | 2 1 |
| 3  | 2 2 | 2 | 2 1 |
| 10 | 2 2 | 2 | 2 1 |
| 9  | 2 2 | 2 | 2 1 |
| 9  | 2 2 | 2 | 2 1 |
| 32 | 2 2 | 2 | 1 1 |
| 9  | 2 2 | 2 | 2 1 |
| 29 | 1 2 | 2 | 1 1 |
| 30 | 1 2 | 2 | 2 1 |
| 5  | 2 2 | 2 | 2 1 |
| 29 | 1 2 | 2 | 1 1 |
| 6  | 2 2 | 2 | 2 1 |
| 9  | 2 2 | 2 | 2 1 |
| 10 | 2 2 | 2 | 2 1 |
| 2  | 2 2 | 2 | 2 1 |
| 17 | 1 2 | 2 | 1 1 |
| 19 | 1 2 | 2 | 1 1 |
| 2  | 2 2 | 2 | 2 1 |
| 10 | 2 2 | 2 | 1 1 |
| 2  | 2 2 | 2 | 2 1 |
| 4  | 2 2 | 2 | 2 1 |
| 5  | 2 2 | 2 | 2 1 |
| 11 | 2 2 | 2 | 2 1 |
| 24 | 1 2 | 2 | 1 1 |
| 17 | 1 2 | 2 | 2 1 |

|    |     |   |     |
|----|-----|---|-----|
| 9  | 2 2 | 2 | 2 1 |
| 27 | 1 2 | 2 | 1 1 |
| 9  | 2 2 | 2 | 1 1 |
| 2  | 2 2 | 2 | 2 1 |
| 4  | 2 2 | 2 | 1 1 |
| 11 | 2 2 | 2 | 1 1 |
| 2  | 2 2 | 2 | 2 1 |
| 11 | 2 2 | 2 | 2 1 |
| 14 | 2 2 | 2 | 2 1 |
| 2  | 2 2 | 2 | 2 1 |
| 25 | 1 2 | 2 | 1 1 |
| 5  | 2 2 | 2 | 2 1 |
| 17 | 1 2 | 2 | 1 1 |
| 26 | 1 2 | 2 | 1 1 |
| 5  | 2 2 | 2 | 2 1 |
| 19 | 1 2 | 2 | 1 1 |
| 2  | 2 2 | 2 | 2 1 |
| 9  | 2 2 | 2 | 2 1 |
| 25 | 1 2 | 2 | 1 1 |
| 14 | 2 2 | 2 | 1 1 |
| 32 | 1 2 | 2 | 1 1 |
| 17 | 1 2 | 2 | 1 1 |
| 3  | 2 2 | 2 | 2 1 |
| 22 | 1 2 | 2 | 2 1 |
| 6  | 2 2 | 2 | 2 1 |
| 26 | 1 2 | 2 | 1 1 |
| 6  | 2 2 | 2 | 2 1 |
| 4  | 2 2 | 2 | 2 1 |
| 14 | 2 2 | 2 | 2 1 |
| 2  | 2 2 | 2 | 2 1 |
| 16 | 2 2 | 2 | 2 1 |
| 4  | 2 2 | 2 | 2 1 |
| 12 | 2 2 | 2 | 1 1 |
| 6  | 2 2 | 2 | 2 1 |
| 17 | 1 2 | 2 | 1 1 |
| 3  | 2 2 | 2 | 2 1 |
| 17 | 1 2 | 2 | 2 1 |
| 14 | 2 2 | 2 | 2 1 |
| 9  | 2 2 | 2 | 2 1 |
| 22 | 1 2 | 2 | 1 1 |
| 34 | 1 2 | 2 | 1 1 |
| 3  | 2 2 | 2 | 2 1 |
| 11 | 2 2 | 2 | 2 1 |
| 24 | 1 2 | 1 | 1 1 |
| 5  | 2 2 | 2 | 2 1 |
| 16 | 1 2 | 2 | 2 1 |

|    |     |   |     |
|----|-----|---|-----|
| 20 | 1 2 | 2 | 1 1 |
| 5  | 2 2 | 2 | 2 1 |
| 2  | 2 2 | 2 | 2 1 |
| 20 | 1 2 | 2 | 2 1 |
| 1  | 2 2 | 2 | 2 1 |
| 27 | 1 2 | 1 | 2 1 |
| 25 | 1 2 | 2 | 1 1 |
| 4  | 2 2 | 2 | 1 1 |
| 1  | 2 2 | 2 | 2 1 |
| 14 | 2 2 | 2 | 2 1 |
| 9  | 2 2 | 2 | 2 1 |
| 17 | 1 2 | 2 | 2 1 |
| 14 | 2 2 | 2 | 2 1 |
| 17 | 1 2 | 2 | 1 1 |
| 41 | 1 2 | 2 | 1 1 |
| 1  | 2 2 | 2 | 2 1 |
| 17 | 1 2 | 2 | 2 1 |
| 4  | 2 2 | 2 | 2 1 |
| 4  | 2 2 | 2 | 2 1 |
| 20 | 1 2 | 2 | 2 1 |
| 2  | 2 2 | 2 | 2 1 |
| 29 | 1 2 | 2 | 1 1 |
| 9  | 2 2 | 2 | 2 1 |
| 9  | 2 2 | 2 | 2 1 |
| 3  | 2 2 | 2 | 2 1 |
| 2  | 2 2 | 2 | 2 1 |
| 22 | 1 2 | 2 | 2 1 |
| 3  | 2 2 | 2 | 2 1 |
| 25 | 1 2 | 1 | 2 1 |
| 17 | 1 2 | 2 | 2 1 |
| 26 | 1 2 | 1 | 1 1 |
| 5  | 2 2 | 2 | 1 1 |
| 1  | 2 2 | 2 | 2 1 |
| 2  | 2 2 | 2 | 2 1 |
| 2  | 2 2 | 2 | 2 1 |
| 17 | 1 2 | 2 | 2 1 |
| 4  | 2 2 | 2 | 2 1 |
| 9  | 2 2 | 2 | 1 1 |
| 2  | 2 2 | 2 | 2 1 |
| 19 | 1 2 | 2 | 2 1 |
| 14 | 2 2 | 2 | 2 1 |
| 5  | 2 2 | 2 | 2 1 |
| 9  | 2 2 | 2 | 2 1 |
| 2  | 2 2 | 2 | 2 1 |
| 2  | 2 2 | 2 | 2 1 |
| 3  | 2 2 | 2 | 2 1 |

|    |     |   |     |
|----|-----|---|-----|
| 14 | 2 2 | 2 | 1 1 |
| 1  | 2 2 | 2 | 2 1 |
| 24 | 1 2 | 2 | 1 1 |
| 6  | 2 2 | 2 | 2 1 |
| 22 | 1 2 | 2 | 1 1 |
| 8  | 2 2 | 2 | 2 1 |
| 14 | 2 2 | 2 | 2 1 |
| 2  | 2 2 | 2 | 2 1 |
| 3  | 2 2 | 2 | 1 1 |
| 17 | 1 2 | 2 | 1 1 |
| 17 | 1 2 | 2 | 2 1 |
| 8  | 2 2 | 2 | 2 1 |
| 9  | 2 2 | 1 | 2 1 |
| 33 | 1 2 | 2 | 1 1 |
| 5  | 2 2 | 2 | 2 1 |
| 5  | 2 2 | 2 | 1 1 |
| 9  | 2 2 | 2 | 1 1 |
| 4  | 2 2 | 2 | 2 1 |
| 1  | 2 2 | 2 | 1 1 |
| 25 | 1 2 | 1 | 2 1 |
| 26 | 1 2 | 2 | 1 1 |
| 6  | 2 2 | 2 | 2 1 |
| 22 | 1 2 | 2 | 1 1 |
| 2  | 2 2 | 2 | 2 1 |
| 2  | 2 2 | 2 | 2 1 |
| 2  | 2 2 | 2 | 2 1 |
| 1  | 2 2 | 2 | 2 1 |
| 1  | 2 2 | 2 | 2 1 |
| 29 | 1 2 | 1 | 1 1 |
| 4  | 2 2 | 2 | 2 1 |
| 2  | 2 2 | 2 | 1 1 |
| 2  | 2 2 | 2 | 2 1 |
| 21 | 1 2 | 2 | 1 1 |
| 16 | 1 2 | 2 | 1 1 |
| 10 | 2 2 | 2 | 2 1 |
| 17 | 1 2 | 2 | 2 1 |
| 10 | 2 2 | 2 | 2 1 |
| 17 | 1 2 | 2 | 1 1 |
| 11 | 2 2 | 2 | 2 1 |
| 6  | 2 2 | 2 | 2 1 |
| 22 | 1 2 | 2 | 2 1 |
| 4  | 2 2 | 2 | 2 1 |
| 9  | 2 2 | 2 | 1 1 |
| 10 | 2 2 | 2 | 1 1 |
| 29 | 1 2 | 2 | 1 1 |
| 2  | 2 2 | 2 | 2 1 |

|    |     |   |     |
|----|-----|---|-----|
| 17 | 1 2 | 2 | 1 1 |
| 9  | 2 2 | 1 | 1 1 |
| 29 | 1 2 | 1 | 2 1 |
| 20 | 1 2 | 1 | 1 1 |
| 9  | 2 2 | 2 | 1 1 |
| 2  | 2 2 | 2 | 2 1 |
| 8  | 2 2 | 2 | 2 1 |
| 17 | 1 2 | 2 | 2 1 |
| 1  | 2 2 | 2 | 2 1 |
| 5  | 2 2 | 2 | 1 1 |
| 14 | 2 2 | 2 | 2 1 |
| 17 | 1 2 | 2 | 2 1 |
| 5  | 2 2 | 2 | 2 1 |
| 5  | 2 2 | 1 | 1 1 |
| 3  | 2 2 | 2 | 2 1 |
| 3  | 2 2 | 2 | 1 1 |
| 14 | 2 2 | 2 | 1 1 |
| 10 | 2 2 | 2 | 2 1 |
| 3  | 2 2 | 2 | 2 1 |
| 2  | 2 2 | 2 | 2 1 |
| 17 | 1 2 | 2 | 1 1 |
| 21 | 1 2 | 2 | 2 1 |
| 24 | 1 2 | 2 | 2 1 |
| 5  | 2 2 | 2 | 2 1 |
| 2  | 2 2 | 2 | 2 1 |
| 3  | 2 2 | 2 | 2 1 |
| 22 | 1 2 | 2 | 1 1 |
| 10 | 2 2 | 1 | 1 1 |
| 1  | 2 2 | 2 | 2 1 |
| 25 | 1 2 | 2 | 1 1 |
| 2  | 2 2 | 2 | 2 1 |
| 26 | 1 2 | 2 | 1 1 |
| 25 | 1 2 | 1 | 1 1 |
| 14 | 2 2 | 2 | 2 1 |
| 12 | 2 2 | 2 | 1 1 |
| 5  | 2 2 | 2 | 2 1 |
| 14 | 2 2 | 2 | 1 1 |
| 3  | 2 2 | 2 | 2 1 |
| 2  | 2 2 | 2 | 2 1 |
| 5  | 2 2 | 2 | 2 1 |
| 3  | 2 2 | 2 | 2 1 |
| 29 | 1 2 | 1 | 2 1 |
| 2  | 2 2 | 2 | 2 1 |
| 10 | 2 2 | 2 | 2 1 |
| 5  | 2 2 | 2 | 2 1 |
| 10 | 2 2 | 2 | 2 1 |

|    |     |   |     |
|----|-----|---|-----|
| 33 | 1 2 | 2 | 2 1 |
| 2  | 2 2 | 2 | 2 1 |
| 6  | 2 2 | 2 | 2 1 |
| 11 | 2 2 | 2 | 2 1 |
| 25 | 1 2 | 2 | 1 1 |
| 19 | 1 2 | 2 | 1 1 |
| 17 | 1 2 | 2 | 1 1 |
| 6  | 2 2 | 2 | 2 1 |
| 5  | 2 2 | 2 | 2 1 |
| 13 | 2 2 | 2 | 2 1 |
| 9  | 2 2 | 2 | 2 1 |
| 9  | 2 2 | 2 | 2 1 |
| 3  | 2 2 | 2 | 2 1 |
| 17 | 1 2 | 2 | 2 1 |
| 3  | 2 2 | 2 | 2 1 |
| 10 | 2 2 | 2 | 2 1 |
| 1  | 2 2 | 2 | 2 1 |
| 22 | 1 2 | 2 | 2 1 |
| 11 | 2 2 | 2 | 1 1 |
| 24 | 1 2 | 2 | 2 1 |
| 10 | 2 2 | 2 | 1 1 |
| 8  | 2 2 | 2 | 2 1 |
| 3  | 2 2 | 2 | 2 1 |
| 1  | 2 2 | 2 | 2 1 |
| 6  | 2 2 | 2 | 2 1 |
| 25 | 1 2 | 2 | 1 1 |
| 13 | 2 2 | 2 | 1 1 |
| 10 | 2 2 | 2 | 2 1 |
| 16 | 2 2 | 2 | 1 1 |
| 22 | 1 2 | 2 | 1 1 |
| 22 | 1 2 | 2 | 1 1 |
| 5  | 2 2 | 2 | 1 1 |
| 29 | 1 2 | 2 | 1 1 |
| 9  | 2 2 | 2 | 2 1 |
| 3  | 2 2 | 2 | 2 1 |
| 19 | 1 2 | 2 | 1 1 |
| 17 | 1 2 | 2 | 1 1 |
|    | 2 2 | 2 | 2 1 |
| 19 | 1 2 | 2 | 1 1 |
| 6  | 2 2 | 2 | 2 1 |
| 2  | 2 2 | 2 | 2 1 |
| 14 | 2 2 | 1 | 1 1 |
| 6  | 2 2 | 2 | 2 1 |
| 1  | 2 2 | 2 | 2 1 |
| 13 | 2 2 | 2 | 1 1 |
| 5  | 2 2 | 2 | 2 1 |

|    |     |   |     |
|----|-----|---|-----|
| 9  | 2 2 | 2 | 2 1 |
| 24 | 1 2 | 2 | 1 1 |
| 3  | 2 2 | 2 | 2 1 |
| 9  | 2 2 | 2 | 2 1 |
| 22 | 1 2 | 2 | 1 1 |
| 1  | 2 2 | 2 | 2 1 |
| 2  | 2 2 | 2 | 1 1 |
| 9  | 2 2 | 2 | 1 1 |
| 38 | 1 2 | 1 | 1 1 |
| 5  | 2 2 | 2 | 2 1 |
| 25 | 1 2 | 2 | 1 1 |
| 11 | 2 2 | 2 | 2 1 |
| 17 | 1 2 | 2 | 2 1 |
| 17 | 1 2 | 2 | 2 1 |
| 2  | 2 2 | 2 | 2 1 |
| 2  | 2 2 | 2 | 2 1 |
| 17 | 1 2 | 1 | 2 1 |
| 3  | 2 2 | 2 | 2 1 |
| 14 | 2 2 | 2 | 1 1 |
| 8  | 2 2 | 2 | 2 1 |
| 8  | 2 2 | 2 | 2 1 |
| 29 | 1 2 | 2 | 1 1 |
| 9  | 2 2 | 2 | 2 1 |
| 14 | 2 2 | 2 | 1 1 |
| 9  | 2 2 | 2 | 2 1 |
| 9  | 2 2 | 2 | 1 1 |
| 9  | 2 2 | 2 | 2 1 |
| 4  | 2 2 | 2 | 2 1 |
| 14 | 2 2 | 2 | 2 1 |
| 14 | 2 2 | 2 | 1 1 |
| 2  | 2 2 | 2 | 2 1 |
| 13 | 2 2 | 2 | 1 1 |
| 3  | 2 2 | 2 | 2 1 |
| 9  | 2 2 | 2 | 2 1 |
| 50 | 1 2 | 2 | 1 1 |
| 10 | 2 2 | 2 | 2 1 |
| 18 | 1 2 | 2 | 1 1 |
| 9  | 2 2 | 2 | 2 1 |
| 9  | 2 2 | 2 | 2 1 |
| 4  | 2 2 | 2 | 2 1 |
| 9  | 2 2 | 2 | 1 1 |
| 6  | 2 2 | 2 | 2 1 |
| 16 | 1 2 | 1 | 1 1 |
| 50 | 1 2 | 2 | 1 1 |
| 9  | 2 2 | 2 | 2 1 |
| 29 | 1 2 | 2 | 1 1 |

|    |     |   |     |
|----|-----|---|-----|
| 13 | 2 2 | 2 | 2 1 |
| 9  | 2 2 | 2 | 1 1 |
| 17 | 1 2 | 2 | 1 1 |
| 20 | 1 2 | 2 | 1 1 |
| 21 | 1 2 | 2 | 1 1 |
| 14 | 2 2 | 1 | 1 1 |
| 26 | 1 2 | 2 | 1 1 |
| 9  | 2 2 | 2 | 2 1 |
| 6  | 2 2 | 2 | 2 1 |
| 25 | 1 2 | 2 | 2 1 |
|    | 2 2 | 2 | 2 1 |
| 13 | 2 2 | 2 | 1 1 |
| 4  | 2 2 | 2 | 2 1 |
| 4  | 2 2 | 2 | 2 1 |
| 17 | 1 2 | 2 | 2 1 |
| 22 | 1 2 | 2 | 1 1 |
| 17 | 1 2 | 2 | 1 1 |
| 3  | 2 2 | 2 | 2 1 |
| 3  | 2 2 | 2 | 2 1 |
| 10 | 2 2 | 2 | 2 1 |
| 3  | 2 2 | 2 | 2 1 |
| 3  | 2 2 | 2 | 2 1 |
| 11 | 2 2 | 2 | 2 1 |
| 6  | 2 2 | 2 | 2 1 |
| 2  | 2 2 | 2 | 2 1 |
| 17 | 1 2 | 2 | 2 1 |
| 6  | 2 2 | 2 | 2 1 |
| 11 | 2 2 | 2 | 2 1 |
| 3  | 2 2 | 2 | 2 1 |
| 12 | 2 2 | 2 | 2 1 |
| 14 | 2 2 | 2 | 2 1 |
| 9  | 2 2 | 2 | 2 1 |
| 4  | 2 2 | 2 | 2 1 |
| 2  | 2 2 | 2 | 2 1 |
| 11 | 2 2 | 2 | 2 1 |
| 11 | 2 2 | 2 | 2 1 |
| 9  | 2 2 | 2 | 2 1 |
| 24 | 1 2 | 2 | 2 1 |
| 6  | 2 2 | 2 | 2 1 |
| 12 | 2 2 | 2 | 2 1 |
| 25 | 1 2 | 1 | 2 1 |
| 14 | 2 2 | 2 | 1 1 |
| 5  | 2 2 | 2 | 2 1 |
| 22 | 1 2 | 2 | 1 1 |
| 14 | 2 2 | 2 | 2 1 |
| 17 | 1 2 | 2 | 1 1 |



|    |     |   |     |
|----|-----|---|-----|
| 4  | 2 2 | 2 | 2 1 |
| 2  | 2 2 | 2 | 2 1 |
| 2  | 2 2 | 2 | 2 1 |
| 9  | 2 2 | 2 | 2 1 |
| 10 | 2 2 | 2 | 2 1 |
| 3  | 2 2 | 2 | 2 1 |
| 38 | 1 2 | 2 | 1 1 |
| 9  | 2 2 | 2 | 1 1 |
| 9  | 2 2 | 2 | 2 1 |
| 33 | 1 2 | 1 | 1 1 |
| 8  | 2 2 | 2 | 2 1 |
| 5  | 2 2 | 2 | 2 1 |
| 22 | 1 2 | 2 | 2 1 |
| 6  | 2 2 | 2 | 2 1 |
| 17 | 1 2 | 2 | 1 1 |
| 6  | 2 2 | 2 | 1 1 |
| 18 | 1 2 | 1 | 1 1 |
| 26 | 1 2 | 1 | 1 1 |
| 17 | 1 2 | 2 | 1 1 |
| 3  | 2 2 | 2 | 2 1 |
| 50 | 1 2 | 2 | 1 1 |
| 22 | 1 2 | 2 | 1 1 |
| 11 | 2 2 | 2 | 2 1 |
| 25 | 1 2 | 2 | 2 1 |
| 17 | 1 2 | 2 | 1 1 |
| 11 | 2 2 | 2 | 2 1 |
| 10 | 2 2 | 2 | 2 1 |
| 9  | 2 2 | 2 | 1 1 |
| 10 | 2 2 | 2 | 2 1 |
| 3  | 2 2 | 2 | 2 1 |
| 17 | 1 2 | 2 | 1 1 |
| 9  | 2 2 | 2 | 2 1 |
| 13 | 2 2 | 2 | 1 1 |
| 6  | 2 2 | 2 | 1 1 |
| 9  | 2 2 | 2 | 2 1 |
| 9  | 2 2 | 2 | 2 1 |
| 11 | 2 2 | 2 | 2 1 |
| 17 | 1 2 | 2 | 1 1 |
| 21 | 1 2 | 2 | 2 1 |
| 24 | 1 2 | 2 | 2 1 |
| 22 | 1 2 | 1 | 1 1 |
| 11 | 2 2 | 2 | 2 1 |
| 14 | 2 2 | 2 | 1 1 |
| 1  | 2 2 | 2 | 2 1 |
| 11 | 2 2 | 2 | 1 1 |
| 29 | 1 2 | 2 | 1 1 |

|    |     |   |     |
|----|-----|---|-----|
| 9  | 2 2 | 2 | 2 1 |
| 13 | 2 2 | 2 | 2 1 |
| 25 | 1 2 | 1 | 1 1 |
| 14 | 2 2 | 2 | 1 1 |
| 2  | 2 2 | 2 | 2 1 |
| 14 | 2 2 | 2 | 2 1 |
| 10 | 2 2 | 2 | 1 1 |
| 4  | 2 2 | 2 | 2 1 |
| 29 | 1 2 | 2 | 1 1 |
| 6  | 2 2 | 2 | 2 1 |
| 6  | 2 2 | 2 | 2 1 |
| 25 | 1 2 | 1 | 1 1 |
| 12 | 2 2 | 2 | 1 1 |
| 3  | 2 2 | 2 | 2 1 |
| 14 | 2 2 | 2 | 2 1 |
| 4  | 2 2 | 2 | 2 1 |
| 14 | 2 2 | 2 | 1 1 |
| 17 | 1 2 | 2 | 2 1 |
| 3  | 2 2 | 2 | 2 1 |
| 6  | 2 2 | 2 | 1 1 |
| 14 | 2 2 | 2 | 2 1 |
| 4  | 2 2 | 2 | 1 1 |
| 29 | 1 2 | 2 | 2 1 |
| 10 | 2 2 | 2 | 2 1 |
| 10 | 2 2 | 2 | 1 1 |
| 29 | 1 2 | 2 | 1 1 |
| 18 | 1 2 | 2 | 1 1 |
| 6  | 2 2 | 2 | 2 1 |
| 10 | 2 2 | 1 | 1 1 |
| 41 | 1 2 | 2 | 2 1 |
| 35 | 1 2 | 2 | 2 1 |
| 6  | 2 2 | 2 | 2 1 |
| 34 | 1 2 | 2 | 2 1 |
| 26 | 1 2 | 2 | 2 1 |

| Zeit_bis_Tod | Austrittsort_Umcodiert | Unfallort_umcodiert | S_100  |
|--------------|------------------------|---------------------|--------|
|              |                        | 5                   | 1.6800 |
|              |                        | 5                   | .1440  |
|              |                        | 10                  | .2690  |
|              |                        | 7                   | .0670  |
|              |                        | 10                  | 9.4100 |
|              |                        | 7                   | .3560  |
|              | 3                      | 5                   | .5220  |
|              |                        | 7                   | .1270  |
|              | 8                      | 5                   | .0730  |
|              |                        | 14                  | .0490  |
|              |                        | 14                  | .3520  |
|              | 8                      | 10                  | .4890  |
|              |                        | 10                  | .1260  |
|              |                        | 10                  | .1340  |
|              | 8                      | 14                  | 1.5200 |
|              | 7                      | 5                   | .3560  |
|              |                        | 7                   | .2040  |
|              | 8                      | 14                  | .0960  |
|              | 7                      | 5                   | .3610  |
|              | 5                      | 5                   | .0640  |
|              | 8                      | 7                   | .0560  |
|              | 7                      | 10                  | .1130  |
|              |                        | 7                   | .2530  |
|              |                        | 5                   | .1000  |
| 1            |                        | 7                   | 3.1100 |
|              |                        |                     | .5690  |
|              |                        | 10                  | .3760  |
|              |                        | 10                  | .1040  |
|              |                        | 5                   | .0720  |
|              | 7                      | 7                   | .2140  |
|              |                        | 5                   | .1010  |
|              | 7                      | 7                   | .3090  |
|              |                        | 10                  | .1190  |
|              |                        | 5                   | .1020  |
|              | 7                      | 10                  | .1080  |
|              |                        | 5                   | .0900  |
|              |                        | 10                  | .1050  |
|              |                        | 10                  | 2.6500 |
|              |                        | 5                   | .2380  |
|              |                        | 5                   | .1520  |
|              |                        | 5                   | .1150  |
|              |                        | 10                  | .0650  |
|              | 5                      | 10                  | .2120  |
|              |                        | 7                   | .4830  |
|              |                        | 5                   | .1710  |

2

7

7

0

|    |         |
|----|---------|
| 14 | .6680   |
| 7  | .2090   |
| 5  | .7160   |
| 10 | .1470   |
| 10 | .9420   |
| 10 | .0900   |
| 10 | .2200   |
| 10 | .6750   |
| 5  | .3980   |
| 5  | .4970   |
| 5  | .1100   |
| 10 | 16.4900 |
| 10 | .2060   |
| 10 | .3880   |
| 7  | .0760   |
| 10 | .1190   |
| 7  | .3050   |
| 5  | .4530   |
| 10 | .2260   |
| 14 | 1.6600  |
| 10 | .3100   |
|    | 5.3000  |
| 7  | .1760   |
| 14 | 2.7700  |
| 7  | 1.2300  |
| 7  | .1020   |
| 10 | .2130   |
| 5  | 1.1700  |
| 14 | .0680   |
| 7  | .6730   |
| 7  | .1240   |
| 10 | .0730   |
| 7  | 1.0700  |
| 5  | .2300   |
| 10 | 6.7800  |
| 5  | 2.2000  |
| 14 | 1.4500  |
| 7  | .1500   |
| 10 | .4750   |
| 5  | .1120   |
| 5  | .1240   |
| 5  | .0900   |
| 7  | .4850   |
| 5  | 2.5900  |
| 14 | 8.3700  |
| 5  | .0930   |



237

0

27

3

3

3

7 .1500  
14 1.1300  
14 .1680  
5 .0630  
7 .0930  
7 .3080  
5 12.1000  
14 17.0800  
10 .1120  
14 .2460  
7 1.2800  
14 .5940  
5 15.2300  
14 5.6400  
5 .3070  
14 .3150  
5 .3010  
7 .4800  
7 .2210  
5 1.2500  
7 .1110  
14 3.6200  
10 .5020  
14 3.0600  
14 1.5000  
14 1.0100  
5 5.7000  
14 .9030  
7 .4200  
10 .4260  
7 1.5000  
14 1.7300  
7 .9470  
14 .8200  
14 .1810  
10 .0720  
14 .0800  
5 .9210  
14 .2660  
14 1.9800  
14 .7380  
14 .5450  
5 .4410  
10 .6580  
14 .7390  
10 .6330

|   |    |        |
|---|----|--------|
|   | 14 | 1.5700 |
|   | 5  | .0780  |
|   | 14 | 2.1700 |
|   | 5  | .1490  |
|   | 14 | .3070  |
|   | 5  | .8990  |
|   | 14 | 3.5200 |
|   | 5  | .9530  |
|   | 14 | 5.4000 |
|   | 5  | .6540  |
|   | 14 | .1290  |
|   | 14 | .0580  |
|   | 5  | .4520  |
|   | 14 | .1590  |
|   | 5  | .2010  |
|   | 7  | .0490  |
|   | 14 | .6510  |
|   | 7  | 1.9300 |
| 3 | 7  | .2090  |
|   | 10 | .3120  |
|   | 14 | .4670  |
|   | 5  | .6410  |
|   | 10 | .0990  |
|   | 10 | .0800  |
|   | 14 | .4490  |
|   | 5  | .3350  |
|   | 5  | .2880  |
|   | 5  | .1220  |
|   | 14 | .4200  |
|   | 7  | .8180  |
|   | 14 | .8490  |
| 3 | 10 | 2.5000 |
|   | 5  | .7720  |
|   | 7  | .1730  |
|   | 7  | 1.1800 |
| 7 | 14 | .9770  |
|   | 14 | 2.8300 |
|   | 14 | .1260  |
|   | 10 | .9000  |
|   | 10 | 2.2600 |
|   | 7  | .3980  |
|   | 14 | 1.0400 |
|   | 5  | .1880  |
|   | 5  | .7590  |
|   | 5  | .3010  |
|   | 5  | 2.8400 |

|    |   |    |        |
|----|---|----|--------|
| 47 |   | 5  | 3.0100 |
|    |   | 14 | .5210  |
|    |   | 14 | .1770  |
|    |   | 5  | .3820  |
|    |   | 5  | .6150  |
|    |   | 14 | .3100  |
|    |   | 5  | .3880  |
|    |   | 14 | .6360  |
|    |   | 14 | .5620  |
|    |   | 14 | .5740  |
|    | 5 | 5  | .2320  |
|    |   | 10 | .4320  |
|    |   | 14 | 2.5300 |
|    |   | 14 | .0820  |
|    |   | 14 | .8990  |
| 1  |   | 14 | 1.1200 |
|    | 5 | 14 | .0350  |
|    |   | 10 | .5410  |
|    |   | 14 | .2190  |
| 2  |   | 10 | 8.3800 |
|    |   | 10 | 1.2800 |
|    |   | 10 | .7390  |
|    |   | 14 | .6910  |
|    | 5 | 5  | .9300  |
|    |   | 14 | 2.2500 |
|    |   | 14 | 5.1100 |
|    |   | 14 | .9550  |
| 0  |   | 14 | 3.7300 |
|    |   | 14 | .1270  |
|    |   | 14 | .4180  |
|    |   | 7  | .4660  |
|    |   | 14 | 1.3000 |
|    |   | 10 | .1020  |
|    |   | 10 | .4280  |
|    |   | 14 | 6.7800 |
|    |   | 14 | .5940  |
|    |   | 7  | .1580  |
|    |   | 14 | .2000  |
|    |   | 14 | 1.5400 |
|    |   | 14 | 6.4900 |
|    |   | 14 | 4.0100 |
| 0  |   | 5  | 3.1400 |
|    |   | 14 | .2220  |
|    |   | 14 | .5300  |
|    |   |    | .3820  |
|    |   | 14 | 1.3000 |



1

14 3.4000  
14 2.4500  
5 .1740  
7 .7730  
5 1.7600  
14 1.2900  
5 .1670  
14 .9260  
14 .2850  
14 .1160  
7 .6330  
14 .4460  
5 5.9400  
7 3.0600  
7 .3560  
14 .5250  
5 .0980  
7 .4650  
10 .7140  
14 1.0300  
14 .0550  
5 .6600  
7 5.9000  
5 2.5600  
7 1.4000  
10 .9030  
10 .4090  
14 .7230  
14 .5100  
14 1.4000  
10 .7530  
7 3.7600  
10 .1280  
10 .4100  
10 1.4500  
14 .0780  
14 .3610  
5 .0870  
14 .8910  
10 .5910  
14 4.8500  
7 3.6200  
5 1.2600  
14 .2830  
5 .4770  
10 .5230

5

7

7

7

|   |    |         |
|---|----|---------|
|   | 14 | 1.6500  |
|   | 14 | .2850   |
|   | 10 | .8190   |
|   | 5  | .0670   |
| 7 | 14 | 1.6000  |
|   | 5  | .7930   |
| 7 | 7  | 32.5100 |
|   | 14 | 3.9000  |
|   | 10 | .2200   |
|   | 5  | .2160   |
| 5 | 5  | .2550   |
|   | 14 | .0560   |
|   | 7  | 2.0600  |
|   | 5  | .5160   |
|   | 14 | 1.3800  |
|   | 5  | .2260   |
|   | 10 | .1260   |
|   | 5  | 3.1800  |
| 7 | 14 | .2320   |
|   | 5  | 1.3600  |
| 7 | 14 | .3890   |
| 7 | 5  | .3750   |
|   | 10 | .3740   |
|   | 14 | .9270   |
|   | 14 | .5180   |
|   | 14 | .2820   |
| 7 | 10 | 2.7100  |
| 3 | 14 | 3.5400  |
|   | 5  | 1.6200  |
| 5 | 14 | .2260   |
|   | 5  | .2000   |
|   | 5  | 1.2100  |
|   | 5  | 2.2700  |
| 7 | 7  | 1.1600  |
|   | 14 | 8.2800  |
| 3 | 14 | .1240   |
|   | 14 | 1.5900  |
|   | 14 | .0520   |
|   | 14 | .4020   |
| 0 | 5  | 13.2900 |
|   | 10 | .9220   |
|   | 5  | .7020   |
|   | 14 | .6120   |
|   | 14 | .0440   |
|   | 10 | .6480   |
|   | 14 | .1770   |

|   |   |    |        |
|---|---|----|--------|
|   |   | 14 | 1.8700 |
|   |   | 5  | 8.3100 |
|   | 3 | 7  | .7190  |
|   |   | 14 | .0580  |
|   |   | 5  | .8100  |
|   |   | 14 | .0660  |
|   |   | 5  | .1700  |
|   |   | 7  | .3570  |
|   |   | 14 | .4050  |
|   |   | 14 | 2.7100 |
|   |   | 14 | .0820  |
|   | 5 | 14 | .8170  |
|   |   | 14 | .1100  |
|   |   | 14 | 2.2000 |
|   |   | 7  | 1.0900 |
|   |   | 5  | .2180  |
|   |   | 14 | .0450  |
|   |   | 10 | .6490  |
|   |   | 14 | .3250  |
|   |   | 5  | .1510  |
| 0 |   | 7  | 8.2300 |
|   |   | 7  | .1840  |
|   |   | 5  | .1790  |
|   |   | 14 | .7870  |
|   |   | 14 | 1.2600 |
|   | 5 | 7  | .1570  |
|   |   | 5  | .6890  |
|   | 5 | 10 | .1170  |
| 1 |   | 14 | 7.8400 |
|   |   | 5  | 4.2200 |
|   |   | 14 | 1.2900 |
|   |   | 5  | .8500  |
|   |   | 10 | .2560  |
|   |   | 14 | 2.1900 |
|   |   | 14 | .2500  |
|   | 3 | 10 | .1260  |
|   |   | 5  | .5250  |
|   |   | 5  | .0920  |
|   |   | 7  | .0740  |
|   |   | 7  | 1.0600 |
|   |   | 7  | .4300  |
|   |   | 14 | .0830  |
|   |   | 5  | .4410  |
|   | 7 | 14 | .0680  |
|   |   | 10 | .2680  |
|   | 5 | 14 | .2210  |

|   |    |        |
|---|----|--------|
| 3 | 5  | .6000  |
|   | 14 | 3.6000 |
|   | 10 | .3940  |
|   | 14 | .8160  |
| 5 | 5  | .1170  |
|   | 7  | .1990  |
|   | 14 | .2120  |
|   | 5  | .2820  |
|   | 14 | 5.2900 |
|   | 14 | .1010  |
|   | 14 | .0780  |
| 3 | 10 | .3600  |
|   | 5  | 1.8100 |
|   | 10 | .2610  |
|   | 14 | .4140  |
|   | 14 | .3660  |
|   | 5  | .4400  |
|   | 7  | .1000  |
| 5 | 10 | .1300  |
| 3 | 14 | 1.0100 |
|   | 5  | .7530  |
|   | 14 | .0860  |
|   | 10 | .4360  |
|   | 5  | .7170  |
|   | 14 | .1060  |
|   | 10 | .3030  |
|   | 14 | 3.9000 |
|   | 14 | .2160  |
| 5 | 7  | .0710  |
|   | 7  | .4070  |
|   | 5  | .5010  |
|   | 7  | .3500  |
|   | 14 | 2.3600 |
|   | 5  | .1630  |
|   | 14 | .5650  |
|   | 7  | 1.5600 |
|   | 14 | .2430  |
|   | 5  | .7640  |
|   | 14 | .1700  |
| 5 | 14 | .0890  |
|   | 10 | .7620  |
|   | 5  | 2.6400 |
|   | 7  | .2560  |
|   | 7  | .0980  |
|   | 5  | .1870  |
|   | 14 | .9690  |

|    |    |         |
|----|----|---------|
|    | 5  | .3940   |
| 12 | 14 | 2.1300  |
|    | 14 | .7330   |
|    | 14 | 7.7600  |
|    | 14 | 6.7600  |
|    | 10 | .4420   |
|    | 5  | .1560   |
|    | 5  | 1.8900  |
|    | 14 | .3300   |
|    | 10 | .3140   |
|    | 14 | .0810   |
|    | 5  | 1.7400  |
|    | 7  | 1.3600  |
|    | 5  | .5970   |
|    | 14 | .2210   |
|    | 7  | .2600   |
|    | 10 | 3.2900  |
| 1  | 7  | 2.5000  |
|    | 5  | .0810   |
| 1  | 7  | 16.1000 |
|    | 5  | .1220   |
|    | 7  | 1.1000  |
|    | 14 | .1030   |
|    | 7  | .2590   |
|    | 5  | 1.5600  |
|    | 5  | .1880   |
|    | 14 | .1430   |
|    | 7  | .1420   |
|    | 10 | 1.1700  |
| 1  | 7  | .8800   |
|    | 10 | .0910   |
|    | 10 | 2.6300  |
|    | 5  | .5140   |
|    | 5  | 6.7700  |
|    | 10 | .1750   |
|    | 7  | .2770   |
|    | 10 | .1500   |
|    | 14 | 2.3000  |
|    | 7  | 1.8800  |
|    |    | 5.0200  |
| 0  | 5  | 1.0700  |
|    | 10 | .6120   |
|    | 10 | 2.2300  |
|    | 5  | .1690   |
|    | 10 | .5490   |
|    | 10 | 2.5800  |

|   |   |    |         |
|---|---|----|---------|
|   |   | 5  | .2310   |
|   |   | 5  | .2870   |
|   |   | 7  | .1800   |
|   | 3 | 5  | 1.7500  |
|   | 5 | 14 | .3650   |
|   | 5 | 14 | .6960   |
| 1 |   | 5  | 11.7000 |
|   |   | 5  | .0790   |
|   |   | 7  | .6850   |
| 5 |   | 10 | 5.6000  |
| 2 |   |    | 2.2500  |
|   |   | 7  | 1.9500  |
|   | 5 | 14 | .2290   |
|   |   | 5  | 1.1400  |
|   |   | 7  | .8480   |
| 2 |   | 10 | 2.2900  |
|   |   | 7  | 1.0500  |
|   |   | 10 | .8860   |
|   |   | 10 | .1250   |
|   | 5 | 5  | .0820   |
|   |   | 14 | .0950   |
|   |   | 10 | .2670   |
|   |   | 10 | .8490   |
|   |   | 7  | .6520   |
|   |   | 5  | .1240   |
|   |   | 14 | 1.1300  |
|   |   | 5  | 2.3900  |
|   |   | 14 | .1360   |
|   |   | 14 | 1.2100  |
|   | 7 | 14 | 1.3400  |
|   |   | 7  | .7500   |
|   |   | 7  | .2910   |
|   | 7 | 5  | .0660   |
|   |   | 7  | .1590   |
|   |   | 10 | .2590   |
|   | 7 | 14 | 1.1700  |
|   | 7 | 5  | 1.3100  |
|   |   | 10 | .1540   |
|   | 7 | 7  | 1.3000  |
|   | 7 | 14 | 3.0900  |
|   | 7 | 7  | .1730   |
|   | 7 | 14 | .0990   |
|   | 7 | 5  | .5750   |
|   | 7 | 14 | .5740   |
|   |   | 7  | .2530   |
|   | 7 | 5  | .1810   |

|     |   |    |        |
|-----|---|----|--------|
|     |   | 5  | .1650  |
|     |   | 10 | .4860  |
| 3   |   | 7  | .4670  |
|     | 7 | 10 | .1540  |
|     | 7 | 7  | .2630  |
|     | 7 | 7  | .2030  |
|     | 7 | 5  | .1130  |
|     | 5 | 10 | .0590  |
|     |   | 14 | .1160  |
|     | 7 | 7  | .3680  |
|     | 3 | 7  | .1580  |
|     | 3 | 14 | .4030  |
|     |   | 14 | .0970  |
| 212 | 5 | 5  | 2.3800 |
|     |   | 5  | 1.0600 |
|     | 5 | 5  | .1790  |
|     | 3 | 10 | .3020  |
|     |   | 14 | .4320  |
|     |   | 5  | .1910  |
|     | 7 | 14 | .8570  |
|     | 5 | 10 | .0570  |
|     | 7 | 14 | .0680  |
|     | 5 | 7  | .4590  |
|     |   | 10 | 2.6000 |
|     | 7 | 10 | .1070  |
|     |   | 10 | .1020  |
|     | 5 | 10 | .4020  |
|     |   | 10 | .1790  |
|     |   | 5  | .3880  |
|     | 3 | 14 | .1710  |
|     | 7 | 14 | .4270  |
|     | 7 | 14 | .5350  |
|     | 7 | 5  | .5050  |
|     | 7 | 5  | 7.1700 |
|     |   | 10 | .9840  |
|     |   | 5  | .7400  |
|     | 7 | 14 | .1540  |
| 3   |   | 7  | .4890  |
|     |   | 5  | 2.9400 |
|     |   | 5  | 6.4200 |
|     | 7 | 10 | 1.6900 |
|     | 7 | 5  | .1240  |
|     | 5 | 14 | .2610  |
|     | 7 | 10 | .3010  |
|     |   | 10 | 1.2800 |
|     |   | 10 | .5410  |

0

|   |    |         |
|---|----|---------|
|   | 14 | 6.4300  |
|   | 14 | .6260   |
|   | 5  | 11.3300 |
|   | 10 | .9080   |
|   | 5  | .8910   |
| 3 | 14 | .5050   |
| 7 | 5  | .3250   |
| 7 | 5  | .8750   |
|   | 14 | 1.3600  |
|   | 14 | 3.3400  |
|   | 5  | 1.0000  |
|   | 14 | .9400   |
|   | 7  | .1450   |
| 7 | 10 | .7850   |
|   | 14 | 2.5100  |
|   | 10 | .1480   |
|   | 10 | .5260   |
| 7 | 10 | .1520   |
|   | 10 | .1100   |
|   | 14 | 7.1500  |
|   | 14 | .6710   |
| 7 | 14 | .2930   |
| 3 | 5  | 1.7600  |
|   | 14 | 4.7500  |
| 7 | 14 | .1020   |
| 3 | 10 | 5.6200  |
| 7 | 14 | .2790   |
| 3 | 14 | .9350   |
| 7 | 5  | .2610   |
|   | 5  | .2900   |
| 7 | 5  | .1200   |
|   | 10 | .4560   |
| 7 | 5  | .0630   |
| 3 | 7  | 1.0100  |
|   | 14 | .5970   |
|   | 7  | .1080   |
| 7 | 5  | .1600   |
|   | 10 | 1.7800  |
|   | 14 | .3010   |
|   | 14 | 4.1900  |
|   | 10 | 3.4300  |
|   | 14 | .9060   |
|   | 14 | 1.8400  |
| 7 | 5  | .0450   |
| 7 | 14 | .3720   |
|   | 14 | .1000   |



|   |   |    |         |
|---|---|----|---------|
|   | 7 | 14 | .1500   |
|   |   | 7  | 1.2100  |
|   | 5 | 14 | .4550   |
|   | 3 | 14 | .3590   |
|   | 3 | 10 | .1570   |
|   |   | 14 | .7210   |
|   | 3 | 7  | .2070   |
|   | 7 | 7  | 1.4100  |
|   | 7 | 7  | .1140   |
|   |   | 14 | 1.7200  |
|   |   | 7  | 2.9700  |
|   | 7 | 14 | .1630   |
|   |   | 7  | 2.8100  |
|   | 7 | 7  | 3.1500  |
|   |   | 5  | 1.3000  |
|   |   | 7  | .2600   |
| 0 |   | 14 | 10.7200 |
|   |   | 14 | .0730   |
|   | 7 | 14 | 1.1500  |
|   |   | 10 | .2010   |
|   |   | 14 | .9930   |
|   |   | 14 | .0860   |
|   |   | 14 | .2070   |
|   | 7 | 10 | .4870   |
|   | 5 | 7  | .2620   |
|   |   | 7  | .9500   |
|   | 5 | 5  | .1200   |
|   |   | 14 | .1140   |
|   | 3 | 14 | .3370   |
|   | 3 | 14 | .0840   |
|   | 7 | 14 | .6100   |
|   |   | 10 | 1.4000  |
|   | 5 | 14 | .1640   |
|   | 7 | 14 | 3.7700  |
|   |   | 10 | 3.2100  |
|   |   | 5  | 2.0100  |
|   |   | 5  | 5.3200  |
| 0 |   | 14 | 2.8800  |
|   |   | 10 | 1.3100  |
|   |   | 14 | 5.1900  |
|   | 7 | 14 | 1.0600  |
|   |   | 14 | .3860   |
|   | 7 | 14 | .1190   |
|   | 7 | 7  | .0950   |
|   | 3 | 14 | .3740   |
|   | 7 | 14 | .5650   |

0

|   |    |        |
|---|----|--------|
| 3 | 14 | .2040  |
| 7 | 5  | .3340  |
|   | 14 | 1.1000 |
| 7 | 7  | .3410  |
|   | 14 | .2800  |
|   | 14 | 1.7800 |
| 5 | 7  | 1.2700 |
| 3 | 10 | .5310  |
|   | 7  | .1410  |
| 3 | 7  | .4900  |
|   | 14 | 2.4800 |
|   | 14 | 1.0100 |
|   | 14 | .1450  |
|   | 14 | 1.2500 |
|   | 14 | .2970  |
|   | 10 | .0690  |
| 7 | 5  | .0620  |
|   | 14 | 5.4600 |
|   | 7  | .5870  |
|   | 7  | .2510  |
| 3 | 10 | .1420  |
|   | 14 | 4.1200 |
| 7 | 14 | .0640  |
| 7 | 14 | .0570  |
|   | 7  | 1.5300 |
| 3 | 14 | .0280  |
|   | 7  | .4230  |
|   | 5  | .0780  |
|   | 14 | 1.3800 |
| 3 | 14 | .3970  |
| 7 | 14 | 1.7700 |
|   | 5  | 1.1400 |
|   | 10 | 1.0500 |
| 7 | 5  | .7740  |
| 5 | 7  | .0850  |
|   | 5  | 3.2800 |
|   | 14 | .6450  |
| 7 | 14 | .8790  |
| 7 | 14 | .0790  |
| 7 | 14 | .2010  |
|   | 14 | 1.5000 |
|   | 5  | .1760  |
| 7 | 14 | .5590  |
|   | 14 | 4.4000 |
|   | 14 | 5.7400 |
| 3 | 7  | 1.5400 |

|   |   |    |         |
|---|---|----|---------|
|   |   | 5  | .8020   |
|   | 7 | 14 | 1.0000  |
|   |   | 14 | 1.5000  |
| 5 |   | 7  | .6590   |
|   |   | 5  | .1450   |
|   | 7 | 5  | 1.0300  |
|   | 7 | 14 | .1910   |
|   |   | 5  | .6640   |
|   |   | 14 | 2.4700  |
|   | 7 | 14 | 2.9800  |
|   | 7 | 10 | .9420   |
|   |   | 14 | 2.0900  |
|   | 5 | 14 | .4670   |
|   |   | 14 | .7090   |
|   | 7 | 10 | .4460   |
|   | 5 | 7  | 2.3600  |
| 1 |   | 14 | 9.5600  |
|   |   | 14 | .2390   |
|   |   | 14 | .0590   |
|   | 3 | 10 | .0730   |
|   |   | 10 | .4480   |
|   |   | 14 | .1480   |
|   |   | 14 | .0690   |
|   |   | 14 | .4500   |
|   | 3 | 7  | 1.0500  |
|   | 3 | 14 | .6400   |
|   |   | 5  | 1.6800  |
|   |   | 5  | .4790   |
|   | 7 | 14 | .3250   |
|   |   | 14 | .4730   |
|   | 3 | 14 | 1.2100  |
|   |   | 14 | .2240   |
|   |   | 14 | .1790   |
|   |   | 14 | 2.3800  |
|   | 3 | 14 | .6340   |
|   | 7 | 14 | .7390   |
|   |   | 14 | 2.8100  |
|   | 5 | 5  | 1.5200  |
|   | 7 | 5  | 1.0500  |
|   | 7 | 14 | .2960   |
|   | 7 | 14 | .5620   |
|   | 7 | 14 | .8100   |
|   |   | 5  | .1450   |
|   |   | 14 | 3.4500  |
|   |   | 14 | 1.6700  |
| 1 |   | 14 | 18.3300 |

|   |   |    |         |
|---|---|----|---------|
|   |   | 10 | 1.9900  |
|   |   | 10 | .6940   |
|   |   | 7  | .0790   |
|   |   | 7  | 7.7800  |
|   | 5 | 7  | 1.1900  |
|   |   | 10 | .3750   |
|   | 7 | 10 | 1.9800  |
| 2 |   | 14 | 5.2400  |
| 0 |   | 14 | 39.0000 |
| 0 |   | 7  | 39.0000 |
|   | 3 | 7  | .2480   |
|   | 7 | 14 | .1120   |
|   |   | 14 | 1.0100  |
|   |   | 14 | 6.2700  |
|   | 7 | 14 | 1.2100  |
|   |   | 14 | .5380   |
|   |   | 14 | .2110   |
|   | 3 | 5  | .1300   |
|   |   | 10 | .3840   |
|   | 7 | 10 | .3920   |
|   | 7 | 7  | .2710   |
|   |   | 14 | .2100   |
|   | 5 | 14 | .2750   |
|   |   | 5  | .1890   |
|   |   | 7  | 1.6300  |
|   | 7 | 14 | .2560   |
|   |   | 14 | .4160   |
|   | 7 | 5  | 4.1200  |
|   | 7 | 5  | .0500   |
| 8 |   | 14 | 7.4300  |
|   |   | 7  | .5750   |
|   |   | 5  | .1840   |
|   |   | 7  | 2.6700  |
|   | 3 | 7  | .4090   |
|   | 7 | 7  | 1.8200  |
| 4 |   | 14 | 1.3700  |
|   |   | 7  | 1.6900  |
|   | 7 | 5  | .0550   |
|   | 3 | 14 | 2.3600  |
|   |   | 14 | .6800   |
| 3 |   | 5  | 15.0300 |
|   |   | 14 | 3.8400  |
| 3 |   | 7  | .2600   |
|   |   | 7  | .5060   |
| 3 |   | 7  | 1.9000  |
|   |   | 14 | 1.9900  |

|    |   |    |         |
|----|---|----|---------|
|    |   | 14 | 2.1700  |
|    |   | 14 | .1980   |
|    | 7 | 14 | .9350   |
|    |   | 10 | .4630   |
|    | 3 | 7  | .1190   |
|    | 3 | 7  | 1.0300  |
|    |   | 10 | 1.7200  |
|    |   | 14 | .6640   |
|    |   | 10 | 1.0800  |
|    | 3 | 10 | 1.0900  |
|    |   | 7  | .6830   |
|    | 7 | 10 | .1650   |
| 0  |   | 7  | 7.9900  |
|    | 7 | 5  | 2.2200  |
|    | 5 | 14 | .1210   |
| 10 |   | 5  | 2.6200  |
|    |   | 7  | .2450   |
|    | 7 | 5  | .5090   |
|    |   | 14 | .0640   |
|    |   | 14 | 2.5400  |
|    |   | 14 | .2840   |
|    | 3 | 14 | 3.6700  |
|    | 7 | 14 | .2460   |
|    | 7 | 5  | 1.1500  |
|    |   | 10 | 2.6700  |
|    | 7 | 7  | .1750   |
|    |   |    | .1720   |
| 0  |   | 14 | 16.2100 |
|    |   | 10 | 2.7600  |
|    |   | 14 | 3.3100  |
|    |   | 10 | 1.2100  |
|    | 7 | 14 | .1300   |
| 0  |   | 10 | 21.7100 |
|    |   | 14 | 2.1700  |
|    |   | 10 | 2.9100  |
| 1  |   | 10 | 2.3100  |
|    |   | 14 | .3560   |
|    |   | 10 | .1730   |
|    |   | 14 | 2.2400  |
|    |   | 5  | .1060   |
|    | 7 | 7  | .2860   |
|    | 7 | 14 | .7590   |
|    | 5 | 5  | 1.1800  |
|    |   | 14 | 1.0200  |
|    | 7 | 5  | 1.6600  |
|    |   | 14 | .7300   |

|   |   |    |        |
|---|---|----|--------|
|   |   | 14 | .7080  |
|   |   | 10 | 1.4600 |
|   | 3 | 14 | .8800  |
|   | 7 | 10 | .9990  |
|   | 5 | 5  | .2890  |
|   |   | 10 | 2.7000 |
|   | 7 | 14 | .0840  |
|   |   | 10 | 2.2700 |
| 1 |   | 5  | 1.4200 |
|   | 7 | 10 | .0620  |
|   |   | 14 | 1.5000 |
|   |   | 5  | .2020  |
| 0 |   | 7  | .1210  |
|   | 3 | 14 | 5.3300 |
|   |   | 10 | .5180  |
|   |   | 14 | .1020  |
|   |   | 14 | .3800  |
|   |   | 14 | 3.1800 |
|   | 7 | 5  | 1.5500 |
|   | 3 | 5  | .2310  |
|   |   | 14 | .2370  |
|   | 7 | 10 | 1.1900 |
|   | 7 | 14 | .4760  |
|   |   | 14 | .3210  |
|   |   | 14 | 1.6400 |
|   | 7 | 10 | 2.0200 |
|   |   | 14 | 1.4500 |
|   |   | 5  | 4.7900 |
|   |   | 14 | 2.7500 |
|   | 7 | 7  | .0650  |
|   |   | 14 | 1.4600 |
|   |   | 5  | 1.3000 |
|   |   | 5  | .6880  |
|   |   | 14 | .3350  |
|   |   | 14 | 3.8900 |
|   |   | 10 | 2.3900 |
| 0 |   | 14 | 1.3600 |
|   | 3 | 14 | 2.6800 |
|   | 7 | 14 | .0890  |
|   |   | 10 | .2300  |
|   |   | 10 | 1.9900 |
|   | 7 | 14 | .6430  |
|   |   | 10 | 2.2600 |
|   | 7 | 14 | .2350  |
|   | 5 | 7  | .1760  |
|   | 3 | 7  | .5180  |

|   |    |         |
|---|----|---------|
|   | 5  | .1440   |
|   | 10 | 1.3500  |
|   | 10 | 1.4700  |
|   | 5  | .6300   |
| 3 | 5  | .9500   |
|   | 10 | .1350   |
|   | 10 | 3.8100  |
| 3 | 14 | 2.3300  |
| 7 | 14 | .1550   |
| 0 | 10 | 39.0000 |
| 7 | 14 | .2420   |
|   | 7  | .8030   |
|   | 14 | 2.1500  |
| 7 | 14 | .8550   |
| 5 | 14 | .3440   |
| 7 | 5  | .2480   |
| 5 | 7  | .4360   |
| 5 | 14 | .5710   |
|   | 14 | .6780   |
| 7 | 5  | .2910   |
|   | 5  | 5.1100  |
|   | 10 | 1.5500  |
| 3 | 14 | .7320   |
|   | 14 | .9300   |
|   | 7  | .2710   |
| 7 | 10 | .5020   |
|   | 14 | 4.2900  |
|   | 5  | .0800   |
|   | 14 | 5.4000  |
|   | 14 | .5660   |
|   | 14 | 3.0200  |
|   | 10 | 9.5900  |
| 7 | 14 | 1.0500  |
|   | 10 | .4090   |
|   | 14 | 3.7700  |
| 5 | 5  | .0630   |
|   | 5  | 2.1200  |
| 3 | 7  | .3530   |
| 7 | 14 | .1500   |
| 3 | 7  | 1.2900  |
| 5 | 10 | .2760   |
|   | 5  | .0570   |
|   | 14 | .2220   |
| 7 | 14 | 1.4700  |
| 3 | 5  | 1.5000  |
|   | 5  | 1.9000  |

|   |    |        |
|---|----|--------|
|   | 5  | 1.2600 |
|   | 5  | 3.0200 |
|   | 7  | 3.9400 |
| 5 | 14 | .0900  |
|   | 5  | 1.0200 |
| 3 | 5  | .3640  |
| 7 | 14 | .1010  |
| 3 | 10 | 3.2100 |
|   | 14 | .6660  |
| 7 | 14 | .2010  |
|   | 10 | .7150  |
| 7 | 14 | .0790  |
|   | 14 | 1.0200 |
|   | 14 | 4.8100 |
| 7 | 5  | .2610  |
|   | 14 | 1.6000 |
| 5 | 5  | .5530  |
|   | 7  | .4650  |
|   | 10 | .1290  |
|   | 14 | .2120  |
|   | 10 | .3530  |
|   | 5  | .9280  |
| 7 | 14 | .8410  |
|   | 14 | .2850  |
| 7 | 5  | .0610  |
|   | 5  | 1.1500 |
| 7 | 14 | 1.1000 |
|   | 5  | 1.5100 |
| 7 | 10 | 1.2400 |
| 7 | 10 | .3450  |
|   | 14 | .2730  |
| 7 | 14 | .4540  |
|   | 14 | .4440  |
| 7 | 5  | .0480  |
|   | 7  | 4.0800 |
| 7 | 14 | .0920  |
| 3 | 7  | .7560  |
| 3 | 14 | 1.1900 |
|   | 14 | 1.5000 |
|   | 5  | 1.5400 |
|   | 5  | 2.7100 |
| 7 | 14 | .5970  |
| 7 | 7  | .5610  |
|   | 14 | 3.6100 |
|   | 7  | 1.5300 |
| 7 | 7  | 1.5300 |



|   |   |    |         |
|---|---|----|---------|
|   |   | 14 | 1.7400  |
|   | 5 | 10 | .8890   |
|   | 7 | 7  | .2970   |
|   | 7 | 10 | .3170   |
|   | 7 | 14 | .2430   |
| 0 |   | 14 | 24.6500 |
|   |   | 7  | .4610   |
|   | 7 | 7  | .2790   |
|   | 5 | 10 | .0990   |
|   | 7 | 5  | 1.9100  |
|   | 7 | 5  | .8900   |
|   |   | 14 | 5.0500  |
|   |   | 5  | .5450   |
|   | 3 | 7  | 3.5000  |
|   |   | 10 | 8.5200  |
|   | 7 | 14 | .0320   |
|   | 7 | 7  | .1800   |
|   |   | 7  | .5400   |
|   | 7 | 7  | .1770   |
|   |   | 14 | .2620   |
|   | 7 | 14 | .0580   |
|   |   | 14 | 2.3100  |
|   | 3 | 10 | .1660   |
|   |   | 5  | 6.1900  |
|   | 7 | 10 | .7480   |
|   | 7 | 14 | .0840   |
|   | 7 | 14 | 6.8700  |
|   | 7 | 14 | .2060   |
| 1 |   | 7  | 1.6100  |
|   |   | 14 | 5.1300  |
| 1 |   | 14 | 9.0000  |
|   |   | 14 | 1.5100  |
|   | 7 | 5  | .1600   |
|   | 5 | 14 | .0340   |
|   | 5 | 14 | .7860   |
|   |   | 5  | 3.7600  |
|   | 7 | 5  | .5380   |
|   |   | 14 | .4850   |
|   | 5 | 5  | .1320   |
|   | 7 | 7  | .6520   |
|   |   | 5  | .5810   |
|   | 7 | 10 | 3.8100  |
|   | 3 | 7  | .2570   |
|   | 7 | 14 | .1910   |
|   | 5 | 14 | .0560   |
|   | 5 | 14 | .2380   |

|   |   |    |         |
|---|---|----|---------|
|   | 3 | 14 | .9420   |
|   | 7 | 5  | 3.2800  |
|   |   | 14 | 1.4300  |
|   | 7 | 14 | .6000   |
|   |   | 14 | 5.5800  |
|   | 7 | 5  | .1700   |
|   |   | 7  | .1880   |
|   | 7 | 5  | .0710   |
|   |   | 7  | .4250   |
|   |   | 14 | 5.8500  |
|   |   | 10 | .3170   |
|   | 7 | 14 | .3250   |
| 0 |   | 5  | 39.0000 |
|   |   | 10 | .7170   |
|   | 7 | 10 | .5140   |
|   |   | 10 | .5120   |
|   |   | 7  | .8850   |
|   |   | 10 | .7870   |
|   | 7 | 5  | .1810   |
| 0 | 3 | 10 | 6.1200  |
|   |   | 10 | .7810   |
|   | 3 | 10 | .7790   |
|   |   | 14 | 1.5100  |
|   | 7 | 14 | .0560   |
|   | 7 | 5  | .1450   |
|   | 7 | 14 | .0860   |
|   | 7 | 14 | .7100   |
|   | 5 | 10 | .0840   |
| 2 |   | 7  | 2.1200  |
|   | 7 | 14 | .9430   |
|   | 7 | 14 | 3.0400  |
|   | 7 | 14 | .2360   |
|   |   | 5  | 2.0400  |
|   |   | 5  | 1.2400  |
|   | 5 | 14 | .6950   |
|   |   | 10 | .1870   |
|   | 5 | 7  | .1590   |
|   |   | 10 | 4.0400  |
|   |   | 10 | .3570   |
|   | 7 | 14 | 1.0900  |
|   |   | 10 | .3600   |
|   | 7 | 14 | 2.2900  |
|   |   | 10 | .1220   |
|   |   | 5  | 5.5000  |
|   |   | 5  | 8.4400  |
|   | 7 | 10 | .1990   |

|    |   |    |         |
|----|---|----|---------|
|    |   | 14 | .7790   |
| 1  |   | 5  | 3.8700  |
| 0  |   | 10 | 12.1800 |
| 1  |   | 14 | 1.3200  |
| 10 |   | 7  | .9160   |
|    | 5 | 5  | .7320   |
|    | 7 | 14 | 2.3600  |
|    | 3 | 10 | .6200   |
|    | 5 | 5  | .0850   |
|    |   | 14 | 3.3300  |
|    |   | 14 | 1.0500  |
|    | 3 | 5  | 2.5100  |
|    | 7 | 5  | .2410   |
| 2  | 7 | 7  | 6.7900  |
|    | 7 | 14 | .2420   |
|    |   | 5  | .2770   |
|    |   | 14 | 3.0100  |
|    | 7 | 7  | .0500   |
|    | 3 | 14 | .8670   |
|    | 7 | 10 | .0730   |
|    |   | 5  | 1.6500  |
|    |   | 7  | 5.3200  |
|    |   | 10 | 5.0900  |
|    | 7 | 5  | .2940   |
|    | 5 | 14 | .0510   |
|    | 7 | 14 | .1490   |
|    | 3 | 5  | 2.3400  |
| 5  |   | 5  | 3.3300  |
|    | 7 | 10 | .9120   |
|    |   | 7  | .1340   |
|    | 7 | 7  | .0600   |
|    |   | 5  | 3.3800  |
| 1  |   | 14 | 13.0300 |
|    |   | 10 | 1.8400  |
|    | 3 | 10 | .9060   |
|    |   | 7  | .8440   |
|    |   | 5  | 7.2800  |
|    | 7 | 7  | .6380   |
| 55 | 7 | 14 | 15.0100 |
|    |   | 14 | .8700   |
|    | 3 | 14 | .1250   |
| 0  |   | 5  | 1.6200  |
|    | 7 | 7  | .2840   |
|    |   | 14 | 6.1900  |
|    | 7 | 14 | .3680   |
|    |   | 5  | .2980   |

|   |    |        |
|---|----|--------|
|   | 10 | 1.9000 |
| 7 | 10 | .2020  |
|   | 5  | .9120  |
| 7 | 5  | .6930  |
|   | 10 | .1150  |
|   | 10 | 1.0800 |
|   | 5  | .8060  |
| 7 | 14 | .1820  |
| 5 | 14 | 1.1200 |
| 3 | 14 | 5.5100 |
| 3 | 14 | .3030  |
| 5 | 7  | .1130  |
| 7 | 14 | 1.2900 |
|   | 14 | 1.6900 |
| 5 | 14 | .3140  |
| 5 | 14 | .0640  |
| 5 | 10 | .1150  |
|   | 14 | 5.6700 |
| 3 | 5  | .0460  |
| 7 | 5  | 1.7500 |
|   | 14 | .6730  |
|   | 10 | .2390  |
| 7 | 14 | .1750  |
| 5 | 10 | .1230  |
| 3 | 7  | .4910  |
|   | 5  | 1.7200 |
|   | 14 | .2640  |
|   | 5  | .1870  |
|   | 7  | .4240  |
|   | 5  | 3.9400 |
|   | 14 | 4.0700 |
| 7 | 10 | .1230  |
|   | 10 | 1.3100 |
|   | 10 | 2.9300 |
| 7 | 14 | .2990  |
|   | 14 | 1.4400 |
|   | 14 | 5.3700 |
|   | 14 | .2850  |
|   | 14 | 1.5200 |
|   | 14 | .4770  |
| 5 | 14 | .5490  |
|   | 14 | 9.0300 |
| 7 | 10 | 1.6300 |
| 5 | 7  | .0380  |
|   | 14 | .7140  |
|   | 10 | .2030  |

|   |   |    |         |
|---|---|----|---------|
|   | 7 | 14 | .6530   |
|   |   | 14 | 1.2000  |
|   | 5 | 7  | 2.2000  |
|   |   | 14 | .4300   |
|   |   | 7  | 1.1800  |
|   | 7 | 7  | .0850   |
|   | 5 | 7  | .4000   |
|   |   | 10 | 1.4400  |
| 3 |   | 7  | 1.0400  |
|   | 5 | 14 | .1070   |
|   |   | 7  | .2520   |
|   | 7 | 14 | .7530   |
|   |   | 14 | .9960   |
|   |   | 5  | 5.1400  |
|   | 7 | 5  | .0680   |
|   | 7 | 14 | .1930   |
| 0 |   | 7  | 27.8400 |
|   | 7 | 7  | .6120   |
|   |   | 7  | .6430   |
|   |   | 14 | .8500   |
|   |   | 5  | .2590   |
|   |   | 5  | 7.3200  |
|   | 7 | 14 | 1.9300  |
|   |   | 10 | .6930   |
|   | 7 | 5  | .3660   |
|   |   | 14 | .6720   |
|   |   | 10 | .9650   |
|   |   | 5  | .5000   |
|   | 7 | 14 | .3420   |
|   | 3 | 14 | 1.5100  |
|   | 7 | 7  | .0790   |
|   |   | 14 | 1.3900  |
|   | 5 | 14 | .1890   |
|   |   | 10 | .6900   |
|   |   | 14 | 6.6700  |
|   | 7 | 14 | .9460   |
|   |   | 5  | 2.8300  |
|   |   | 5  | 2.7200  |
|   | 7 | 5  | 1.3900  |
|   | 7 | 5  | .0970   |
|   |   | 14 | .3460   |
|   | 7 | 10 | 1.8100  |
| 5 |   | 14 | 2.6700  |
|   |   | 5  | 4.2300  |
|   |   | 14 | .2160   |
|   | 3 | 5  | .1960   |

|   |   |    |         |
|---|---|----|---------|
|   | 7 | 10 | .4280   |
|   | 7 | 14 | .4370   |
|   |   | 14 | .8090   |
|   |   | 5  | .7980   |
|   |   | 5  | .7480   |
| 1 | 7 | 5  | 12.2200 |
|   |   | 7  | 4.7500  |
|   |   | 14 | 3.7500  |
|   | 7 | 14 | .4840   |
|   |   | 14 | 2.0100  |
|   |   |    | 1.8900  |
|   |   | 10 | .4280   |
|   | 7 | 10 | 1.2700  |
|   | 5 | 10 | .1800   |
|   | 3 | 14 | 3.1700  |
|   |   | 14 | 1.9700  |
|   |   | 14 | 1.4200  |
|   | 7 | 14 | .1740   |
|   | 3 | 14 | .1420   |
|   | 7 | 10 | .9550   |
|   | 7 | 14 | .2410   |
|   |   | 14 | .2400   |
|   |   | 5  | 4.9900  |
|   | 7 | 5  | .2440   |
|   | 7 | 14 | .0380   |
|   |   | 14 | 5.6700  |
|   | 5 | 14 | 3.1200  |
|   | 3 | 10 | .2970   |
|   | 7 | 14 | .3330   |
|   |   | 10 | 1.6700  |
|   |   | 14 | .3760   |
|   |   | 14 | .1710   |
|   |   | 14 | .1300   |
|   | 5 | 5  | .7070   |
|   | 7 | 14 | .4940   |
|   |   | 5  | .8700   |
|   |   | 5  | 2.7100  |
|   |   | 10 | 3.5200  |
|   |   | 14 | .4710   |
|   | 3 | 10 | 1.9000  |
| 0 |   | 5  | 19.4300 |
|   |   | 7  | 1.8200  |
|   | 7 | 10 | 1.5300  |
|   | 3 | 10 | 3.6700  |
|   |   | 14 | 1.5600  |
|   |   | 5  | 1.7000  |

|   |   |    |        |
|---|---|----|--------|
|   |   | 10 | .7380  |
|   | 5 | 14 | .0550  |
|   | 5 | 14 | .5450  |
|   |   | 14 | .7830  |
|   |   | 5  | .8860  |
|   | 5 | 5  | .2470  |
|   |   | 14 | 9.3600 |
|   |   | 5  | 1.3300 |
|   | 3 | 14 | .2140  |
| 1 |   | 7  | 3.2900 |
|   | 7 | 14 | 3.2100 |
|   |   | 14 | .1950  |
|   |   | 14 | .6460  |
|   | 7 | 14 | .9530  |
|   |   | 7  | 2.1300 |
|   | 7 | 10 | .6590  |
| 0 |   | 7  | 8.3700 |
| 2 |   | 7  | .6480  |
|   |   | 5  | .6060  |
|   | 7 | 5  | 1.1400 |
|   |   | 14 | 9.5100 |
|   |   | 7  | 1.0400 |
|   | 7 | 10 | .0730  |
|   |   | 10 | .6380  |
|   | 3 | 5  | 5.7200 |
|   | 7 | 7  | .1530  |
|   | 7 | 7  | .2390  |
|   | 7 | 5  | 1.2100 |
|   |   | 10 | 3.4400 |
|   | 7 | 14 | .2970  |
|   |   | 14 | .6150  |
|   |   | 7  | 4.9900 |
|   |   | 14 | .7180  |
|   |   | 14 | .2540  |
|   | 3 | 14 | .2420  |
|   | 5 | 14 | .0620  |
|   |   | 14 | .6600  |
|   |   | 5  | 1.2700 |
|   |   | 10 | 1.6000 |
|   | 7 | 5  | 3.7200 |
| 1 |   | 10 | 8.8800 |
|   | 7 | 5  | .3630  |
|   |   | 14 | 2.2700 |
|   | 7 | 7  | .0660  |
|   |   | 5  | 5.1800 |
|   |   | 7  | 5.7400 |

|   |   |    |         |
|---|---|----|---------|
|   |   | 10 | .3440   |
|   |   | 10 | 3.1100  |
| 1 |   | 7  | 2.2000  |
|   |   | 14 | 4.5100  |
|   | 5 | 10 | 1.3900  |
|   |   | 10 | 2.8700  |
|   |   | 10 | 2.3000  |
|   |   | 10 | 1.3300  |
|   |   | 14 | .6040   |
|   | 7 | 14 | .1570   |
|   |   | 5  | 1.8300  |
| 1 |   | 5  | 2.4800  |
|   |   | 7  | 3.1200  |
|   | 7 | 14 | .0640   |
|   |   | 7  | .3710   |
|   |   | 10 | .3440   |
|   |   | 7  | 1.2800  |
|   | 7 | 10 | 5.5300  |
|   | 5 | 14 | .3450   |
|   | 3 | 14 | 1.4000  |
|   |   | 10 | 1.8200  |
|   |   | 10 | .2530   |
|   |   | 7  | .3510   |
|   |   | 14 | 1.3800  |
|   | 7 | 5  | 5.4100  |
|   |   | 14 | 2.6000  |
|   |   | 5  | .7510   |
|   | 5 | 5  | .4570   |
| 1 |   | 5  | 15.0900 |
|   |   | 7  | 2.8200  |
|   |   | 5  | 1.1900  |
|   |   | 7  | .1950   |
|   |   | 10 | 1.4700  |
|   |   | 7  | .2850   |
